# Supplementary material for: Towards Genomic Criteria for Delineating Fungal Species
Source: J Fungi (Basel). 2020 Oct 24;6(4):246. doi: 10.3390/jof6040246 (PMC7711752; doi:10.3390/jof6040246)
Supplement: Supplementary file 1 [file jof-06-00246-s001.zip › Sup2.ods]

## Sheet: species
Species pairs with larger within-pair genome distance than the species-genus threshold as determined by dashing on the fungal genomes whole GenBank database
Anncaliia_algerae	GCA_000385875.2*	GCA_000385855.2*	*GenBank accession numbers of genomic assemblies
Anncaliia_algerae	GCA_000385875.2	GCA_000313815.1		Species with larger intraspecific distances than expected (at least one genome pair above the threshold)
Arthrobotrys_oligospora	GCA_000225545.1	GCA_011066885.1		Unique species names in the list
Arthrobotrys_oligospora	GCA_000225545.1	GCA_011066985.1		Anncaliia_algerae
Arthrobotrys_oligospora	GCA_000225545.1	GCA_011066905.1		Arthrobotrys_oligospora
Aspergillus_terreus	GCA_002749855.1	GCA_000166915.1		Aspergillus_terreus
Aspergillus_terreus	GCA_009834425.1	GCA_000166915.1		Austropuccinia_psidii
Aspergillus_terreus	GCA_001630395.1	GCA_000166915.1		Blastomyces_sp_MA2018
Aspergillus_terreus	GCA_009014675.1	GCA_002930435.1		Blumeria_graminis
Aspergillus_terreus	GCA_009014675.1	GCA_000166915.1		Byssochlamys_spectabilis
Aspergillus_terreus	GCA_000149615.1	GCA_000166915.1		Candida_boidinii
Aspergillus_terreus	GCA_002930435.1	GCA_000166915.1		Clarireedia_homoeocarpa
Aspergillus_terreus	GCA_002930435.1	GCA_009932835.1		Colletotrichum_gloeosporioides
Aspergillus_terreus	GCA_000166915.1	GCA_009932835.1		Cutaneotrichosporon_curvatum
Austropuccinia_psidii	GCA_902702905.1	GCA_000469055.1		Cutaneotrichosporon_cutaneum
Austropuccinia_psidii	GCA_000469055.1	GCA_001443065.1		Debaryomyces_hansenii
Austropuccinia_psidii	GCA_000469055.1	GCA_003724095.1		Diplocarpon_rosae
Blastomyces_sp_MA2018	GCA_003206205.1	GCA_003206215.1		Eurotiomycetes_sp
Blastomyces_sp_MA2018	GCA_003206745.1	GCA_003206215.1		Exophiala_mesophila
Blastomyces_sp_MA2018	GCA_003206725.1	GCA_003206215.1		Exophiala_spinifera
Blastomyces_sp_MA2018	GCA_003206845.1	GCA_003206215.1		Fusarium_equiseti
Blastomyces_sp_MA2018	GCA_003226315.1	GCA_003206215.1		Fusarium_incarnatum
Blastomyces_sp_MA2018	GCA_003206195.1	GCA_003206215.1		Fusarium_tricinctum
Blastomyces_sp_MA2018	GCA_003206215.1	GCA_003206755.1		Ganoderma_lucidum
Blumeria_graminis	GCA_000417865.1	GCA_000401675.1		Golovinomyces_cichoracearum
Blumeria_graminis	GCA_000417865.1	GCA_900638725.1		Hortaea_werneckii
Blumeria_graminis	GCA_000417865.1	GCA_900237765.1		Malassezia_furfur
Blumeria_graminis	GCA_000417865.1	GCA_900239735.1		Malassezia_globosa
Blumeria_graminis	GCA_000417865.1	GCA_000151065.3		Meyerozyma_caribbica
Blumeria_graminis	GCA_000417865.1	GCA_000401615.1		Microbotryum_lychnidisdioicae
Blumeria_graminis	GCA_000401675.1	GCA_000441875.1		Microbotryum_violaceum
Blumeria_graminis	GCA_000401675.1	GCA_000418435.1		Moesziomyces_antarcticus
Blumeria_graminis	GCA_000401675.1	GCA_900519115.1		Mortierella_alpina
Blumeria_graminis	GCA_900638725.1	GCA_000441875.1		Mucor_circinelloides
Blumeria_graminis	GCA_900638725.1	GCA_000418435.1		Naganishia_albida
Blumeria_graminis	GCA_900638725.1	GCA_900519115.1		Nectria_haematococca
Blumeria_graminis	GCA_900237765.1	GCA_000441875.1		Neurospora_discreta
Blumeria_graminis	GCA_900237765.1	GCA_000418435.1		Parastagonospora_avenae
Blumeria_graminis	GCA_900237765.1	GCA_900519115.1		Penicillium_expansum
Blumeria_graminis	GCA_000441875.1	GCA_900239735.1		Penicillium_solitum
Blumeria_graminis	GCA_000441875.1	GCA_000151065.3		Pleurotus_ostreatus
Blumeria_graminis	GCA_000441875.1	GCA_000401615.1		Pleurotus_salmoneostramineus
Blumeria_graminis	GCA_900239735.1	GCA_000418435.1		Pyricularia_grisea
Blumeria_graminis	GCA_900239735.1	GCA_900519115.1		Rhizoctonia_solani
Blumeria_graminis	GCA_000151065.3	GCA_000418435.1		Rhizopogon_sp_AM2018a
Blumeria_graminis	GCA_000151065.3	GCA_900519115.1		Rhizopus_microsporus
Blumeria_graminis	GCA_000418435.1	GCA_000401615.1		Rhodotorula_toruloides
Blumeria_graminis	GCA_900519115.1	GCA_000401615.1		Saccharomyces_cerevisiae
Byssochlamys_spectabilis	GCA_000497085.1	GCA_004015385.1		Saccharomyces_cerevisiae_x_Saccharomyces_eubayanus
Byssochlamys_spectabilis	GCA_000497085.1	GCA_003990805.1		Saccharomyces_eubayanus
Byssochlamys_spectabilis	GCA_000497085.1	GCA_004022145.1		Saccharomyces_kudriavzevii
Candida_boidinii	GCA_002008095.1	GCA_002008075.1		Saccharomyces_pastorianus
Candida_boidinii	GCA_002008095.1	GCA_002007985.1		Saccharomyces_uvarum
Candida_boidinii	GCA_002008095.1	GCA_002008015.1		Saitozyma_podzolica
Candida_boidinii	GCA_002008065.1	GCA_002008075.1		Schizophyllum_commune
Candida_boidinii	GCA_002008065.1	GCA_002007985.1		Serpula_lacrymans
Candida_boidinii	GCA_002008065.1	GCA_002008015.1		Starmerella_bombicola
Candida_boidinii	GCA_002008075.1	GCA_002008085.1		Synchytrium_endobioticum
Candida_boidinii	GCA_002008075.1	GCA_002864065.1		Trichoderma_harzianum
Candida_boidinii	GCA_002008075.1	GCA_003243125.1		Trichosporon_inkin
Candida_boidinii	GCA_002008075.1	GCA_002007995.1		Wickerhamiella_versatilis
Candida_boidinii	GCA_002008075.1	GCA_001442605.1		Yarrowia_lipolytica
Candida_boidinii	GCA_002007985.1	GCA_002008085.1
Candida_boidinii	GCA_002007985.1	GCA_002864065.1
Candida_boidinii	GCA_002007985.1	GCA_003243125.1
Candida_boidinii	GCA_002007985.1	GCA_002007995.1
Candida_boidinii	GCA_002007985.1	GCA_001442605.1
Candida_boidinii	GCA_002008085.1	GCA_002008015.1
Candida_boidinii	GCA_002864065.1	GCA_002008015.1
Candida_boidinii	GCA_003243125.1	GCA_002008015.1
Candida_boidinii	GCA_002008015.1	GCA_002007995.1
Candida_boidinii	GCA_002008015.1	GCA_001442605.1
Clarireedia_homoeocarpa	GCA_002242905.1	GCA_002242865.1
Clarireedia_homoeocarpa	GCA_002242995.1	GCA_002242865.1
Clarireedia_homoeocarpa	GCA_001465935.1	GCA_002242865.1
Clarireedia_homoeocarpa	GCA_002242985.1	GCA_002242865.1
Clarireedia_homoeocarpa	GCA_002242955.1	GCA_002242865.1
Clarireedia_homoeocarpa	GCA_002242865.1	GCA_000280825.1
Clarireedia_homoeocarpa	GCA_002242865.1	GCA_002242835.1
Clarireedia_homoeocarpa	GCA_002242865.1	GCA_001465945.1
Clarireedia_homoeocarpa	GCA_002242865.1	GCA_002242965.1
Colletotrichum_gloeosporioides	GCA_000446055.1	GCA_002901105.1
Colletotrichum_gloeosporioides	GCA_000446055.1	GCA_003666125.1
Colletotrichum_gloeosporioides	GCA_000446055.1	GCA_002189585.1
Colletotrichum_gloeosporioides	GCA_000446055.1	GCA_003568745.1
Colletotrichum_gloeosporioides	GCA_002901105.1	GCA_003243855.1
Colletotrichum_gloeosporioides	GCA_002901105.1	GCA_003666125.1
Colletotrichum_gloeosporioides	GCA_002901105.1	GCA_002189585.1
Colletotrichum_gloeosporioides	GCA_002901105.1	GCA_003568745.1
Colletotrichum_gloeosporioides	GCA_003243855.1	GCA_003666125.1
Colletotrichum_gloeosporioides	GCA_003243855.1	GCA_002189585.1
Colletotrichum_gloeosporioides	GCA_003243855.1	GCA_003568745.1
Colletotrichum_gloeosporioides	GCA_003666125.1	GCA_002189585.1
Colletotrichum_gloeosporioides	GCA_002189585.1	GCA_003568745.1
Cutaneotrichosporon_curvatum	GCA_001028165.1	GCA_001712445.1
Cutaneotrichosporon_curvatum	GCA_001712445.1	GCA_001600275.1
Cutaneotrichosporon_cutaneum	GCA_001600715.1	GCA_001636075.1
Cutaneotrichosporon_cutaneum	GCA_001600715.1	GCA_001613755.1
Cutaneotrichosporon_cutaneum	GCA_001636075.1	GCA_001613755.1
Debaryomyces_hansenii	GCA_006942325.1	GCA_000239015.2
Debaryomyces_hansenii	GCA_006942325.1	GCA_006942235.1
Debaryomyces_hansenii	GCA_006942325.1	GCA_006942225.1
Debaryomyces_hansenii	GCA_006942325.1	GCA_001682995.1
Debaryomyces_hansenii	GCA_006942325.1	GCA_006942305.1
Debaryomyces_hansenii	GCA_006942325.1	GCA_006942205.1
Debaryomyces_hansenii	GCA_006942325.1	GCA_006942215.1
Debaryomyces_hansenii	GCA_006942325.1	GCA_003349505.1
Debaryomyces_hansenii	GCA_006942325.1	GCA_000006445.2
Debaryomyces_hansenii	GCA_000239015.2	GCA_006942235.1
Debaryomyces_hansenii	GCA_000239015.2	GCA_006942225.1
Debaryomyces_hansenii	GCA_000239015.2	GCA_006942305.1
Debaryomyces_hansenii	GCA_000239015.2	GCA_006942205.1
Debaryomyces_hansenii	GCA_000239015.2	GCA_006942215.1
Debaryomyces_hansenii	GCA_000239015.2	GCA_003349505.1
Debaryomyces_hansenii	GCA_000239015.2	GCA_000006445.2
Debaryomyces_hansenii	GCA_006942235.1	GCA_006942225.1
Debaryomyces_hansenii	GCA_006942235.1	GCA_001682995.1
Debaryomyces_hansenii	GCA_006942235.1	GCA_003349505.1
Debaryomyces_hansenii	GCA_006942225.1	GCA_001682995.1
Debaryomyces_hansenii	GCA_006942225.1	GCA_006942305.1
Debaryomyces_hansenii	GCA_006942225.1	GCA_006942205.1
Debaryomyces_hansenii	GCA_006942225.1	GCA_006942215.1
Debaryomyces_hansenii	GCA_006942225.1	GCA_000006445.2
Debaryomyces_hansenii	GCA_001682995.1	GCA_006942305.1
Debaryomyces_hansenii	GCA_001682995.1	GCA_006942205.1
Debaryomyces_hansenii	GCA_001682995.1	GCA_006942215.1
Debaryomyces_hansenii	GCA_001682995.1	GCA_003349505.1
Debaryomyces_hansenii	GCA_001682995.1	GCA_000006445.2
Debaryomyces_hansenii	GCA_006942305.1	GCA_003349505.1
Debaryomyces_hansenii	GCA_006942205.1	GCA_003349505.1
Debaryomyces_hansenii	GCA_006942215.1	GCA_003349505.1
Debaryomyces_hansenii	GCA_003349505.1	GCA_000006445.2
Diplocarpon_rosae	GCA_011320215.1	GCA_011320175.1
Eurotiomycetes_sp	GCA_002916945.1	GCA_002917005.1
Eurotiomycetes_sp	GCA_002916945.1	GCA_002917015.1
Eurotiomycetes_sp	GCA_002917005.1	GCA_002917015.1
Exophiala_mesophila	GCA_004011775.1	GCA_000836275.1
Exophiala_mesophila	GCA_000785215.1	GCA_000836275.1
Exophiala_spinifera	GCA_010883435.1	GCA_001599535.1
Exophiala_spinifera	GCA_001599535.1	GCA_010883305.1
Exophiala_spinifera	GCA_001599535.1	GCA_010883315.1
Exophiala_spinifera	GCA_001599535.1	GCA_010883385.1
Exophiala_spinifera	GCA_001599535.1	GCA_010883335.1
Exophiala_spinifera	GCA_001599535.1	GCA_000836115.1
Exophiala_spinifera	GCA_001599535.1	GCA_010882995.1
Exophiala_spinifera	GCA_001599535.1	GCA_010882975.1
Exophiala_spinifera	GCA_001599535.1	GCA_010882955.1
Fusarium_equiseti	GCA_004367125.1	GCA_002894235.1
Fusarium_equiseti	GCA_002894235.1	GCA_003316835.1
Fusarium_equiseti	GCA_002894235.1	GCA_003313175.1
Fusarium_incarnatum	GCA_004367075.1	GCA_003704985.1
Fusarium_incarnatum	GCA_004367075.1	GCA_003709435.1
Fusarium_tricinctum	GCA_003045085.1	GCA_900382705.2
Fusarium_tricinctum	GCA_003045085.1	GCA_003149365.1
Ganoderma_lucidum	GCA_000262775.1	GCA_000271565.1
Ganoderma_lucidum	GCA_000262775.1	GCA_000338035.1
Ganoderma_lucidum	GCA_000271565.1	GCA_000338035.1
Golovinomyces_cichoracearum	GCA_003611235.1	GCA_003611195.1
Golovinomyces_cichoracearum	GCA_003611235.1	GCA_003611215.1
Hortaea_werneckii	GCA_003704615.1	GCA_003704645.1
Hortaea_werneckii	GCA_003704615.1	GCA_003704675.1
Hortaea_werneckii	GCA_003704615.1	GCA_000410955.1
Hortaea_werneckii	GCA_003704615.1	GCA_003704575.1
Hortaea_werneckii	GCA_003704615.1	GCA_003704375.1
Hortaea_werneckii	GCA_003704615.1	GCA_003704685.1
Hortaea_werneckii	GCA_003704615.1	GCA_002127715.1
Hortaea_werneckii	GCA_003704595.1	GCA_003704645.1
Hortaea_werneckii	GCA_003704595.1	GCA_003704675.1
Hortaea_werneckii	GCA_003704595.1	GCA_000410955.1
Hortaea_werneckii	GCA_003704595.1	GCA_003704575.1
Hortaea_werneckii	GCA_003704595.1	GCA_003704375.1
Hortaea_werneckii	GCA_003704595.1	GCA_003704685.1
Hortaea_werneckii	GCA_003704595.1	GCA_002127715.1
Hortaea_werneckii	GCA_003704645.1	GCA_003704675.1
Hortaea_werneckii	GCA_003704645.1	GCA_003704585.1
Hortaea_werneckii	GCA_003704645.1	GCA_000410955.1
Hortaea_werneckii	GCA_003704645.1	GCA_003704575.1
Hortaea_werneckii	GCA_003704645.1	GCA_003704375.1
Hortaea_werneckii	GCA_003704645.1	GCA_003704685.1
Hortaea_werneckii	GCA_003704645.1	GCA_002127715.1
Hortaea_werneckii	GCA_003704675.1	GCA_003704585.1
Hortaea_werneckii	GCA_003704675.1	GCA_003704575.1
Hortaea_werneckii	GCA_003704675.1	GCA_003704375.1
Hortaea_werneckii	GCA_003704585.1	GCA_000410955.1
Hortaea_werneckii	GCA_003704585.1	GCA_003704685.1
Hortaea_werneckii	GCA_003704585.1	GCA_002127715.1
Hortaea_werneckii	GCA_000410955.1	GCA_003704575.1
Hortaea_werneckii	GCA_000410955.1	GCA_003704375.1
Hortaea_werneckii	GCA_003704575.1	GCA_003704685.1
Hortaea_werneckii	GCA_003704575.1	GCA_002127715.1
Hortaea_werneckii	GCA_003704375.1	GCA_003704685.1
Hortaea_werneckii	GCA_003704375.1	GCA_002127715.1
Malassezia_furfur	GCA_001265045.1	GCA_009938135.1
Malassezia_furfur	GCA_001265045.1	GCA_001265065.1
Malassezia_furfur	GCA_002549865.1	GCA_009938135.1
Malassezia_furfur	GCA_002549865.1	GCA_001265065.1
Malassezia_globosa	GCA_001264815.1	GCA_000181695.1
Malassezia_globosa	GCA_001264815.1	GCA_001264795.1
Malassezia_globosa	GCA_001264815.1	GCA_001264805.1
Meyerozyma_caribbica	GCA_900232065.1	GCA_000755205.1
Meyerozyma_caribbica	GCA_900231995.1	GCA_000755205.1
Meyerozyma_caribbica	GCA_000755205.1	GCA_900231965.1
Meyerozyma_caribbica	GCA_000755205.1	GCA_900232055.1
Meyerozyma_caribbica	GCA_000755205.1	GCA_003707125.2
Microbotryum_lychnidisdioicae	GCA_900010535.1	GCA_900016695.1
Microbotryum_lychnidisdioicae	GCA_900012385.1	GCA_900016695.1
Microbotryum_lychnidisdioicae	GCA_900011025.1	GCA_900016695.1
Microbotryum_lychnidisdioicae	GCA_900015445.1	GCA_900016695.1
Microbotryum_lychnidisdioicae	GCA_000166175.1	GCA_900016695.1
Microbotryum_lychnidisdioicae	GCA_003121355.1	GCA_900016695.1
Microbotryum_lychnidisdioicae	GCA_900009975.1	GCA_900016695.1
Microbotryum_lychnidisdioicae	GCA_900011535.1	GCA_900016695.1
Microbotryum_lychnidisdioicae	GCA_900010545.1	GCA_900016695.1
Microbotryum_violaceum	GCA_900009495.1	GCA_900008855.1
Microbotryum_violaceum	GCA_900009495.1	GCA_900013405.1
Microbotryum_violaceum	GCA_900009495.1	GCA_009602455.1
Microbotryum_violaceum	GCA_900009495.1	GCA_900015505.1
Microbotryum_violaceum	GCA_900008855.1	GCA_900015435.1
Microbotryum_violaceum	GCA_900008855.1	GCA_900015965.1
Microbotryum_violaceum	GCA_900008855.1	GCA_900013405.1
Microbotryum_violaceum	GCA_900008855.1	GCA_009602455.1
Microbotryum_violaceum	GCA_900008855.1	GCA_900015425.1
Microbotryum_violaceum	GCA_900008855.1	GCA_900015455.1
Microbotryum_violaceum	GCA_900008855.1	GCA_900011735.1
Microbotryum_violaceum	GCA_900008855.1	GCA_900015505.1
Microbotryum_violaceum	GCA_900015435.1	GCA_900013405.1
Microbotryum_violaceum	GCA_900015435.1	GCA_009602455.1
Microbotryum_violaceum	GCA_900015435.1	GCA_900015505.1
Microbotryum_violaceum	GCA_900015965.1	GCA_900013405.1
Microbotryum_violaceum	GCA_900015965.1	GCA_009602455.1
Microbotryum_violaceum	GCA_900015965.1	GCA_900015505.1
Microbotryum_violaceum	GCA_900013405.1	GCA_009602455.1
Microbotryum_violaceum	GCA_900013405.1	GCA_900015425.1
Microbotryum_violaceum	GCA_900013405.1	GCA_900015455.1
Microbotryum_violaceum	GCA_900013405.1	GCA_900011735.1
Microbotryum_violaceum	GCA_009602455.1	GCA_900015425.1
Microbotryum_violaceum	GCA_009602455.1	GCA_900015455.1
Microbotryum_violaceum	GCA_009602455.1	GCA_900011735.1
Microbotryum_violaceum	GCA_009602455.1	GCA_900015505.1
Microbotryum_violaceum	GCA_900015425.1	GCA_900015505.1
Microbotryum_violaceum	GCA_900015455.1	GCA_900015505.1
Microbotryum_violaceum	GCA_900011735.1	GCA_900015505.1
Moesziomyces_antarcticus	GCA_900322835.1	GCA_000334475.1
Moesziomyces_antarcticus	GCA_000747765.1	GCA_000334475.1
Mortierella_alpina	GCA_001021685.1	GCA_000507065.1
Mortierella_alpina	GCA_000240685.2	GCA_000507065.1
Mucor_circinelloides	GCA_000696935.1	GCA_010203745.1
Mucor_circinelloides	GCA_010203745.1	GCA_001276145.1
Mucor_circinelloides	GCA_010203745.1	GCA_000401635.1
Mucor_circinelloides	GCA_010203745.1	GCA_001599575.1
Naganishia_albida	GCA_001444555.1	GCA_001599735.1
Naganishia_albida	GCA_001444555.1	GCA_001468955.1
Nectria_haematococca	GCA_010015875.1	GCA_004026335.1
Nectria_haematococca	GCA_010015875.1	GCA_000151355.1
Nectria_haematococca	GCA_004026335.1	GCA_000151355.1
Nectria_haematococca	GCA_004026335.1	GCA_004026385.1
Nectria_haematococca	GCA_000151355.1	GCA_004026385.1
Neurospora_discreta	GCA_009802435.1	GCA_009803745.1
Neurospora_discreta	GCA_009802435.1	GCA_009804765.1
Neurospora_discreta	GCA_009802435.1	GCA_009804785.1
Neurospora_discreta	GCA_009802435.1	GCA_009803905.1
Neurospora_discreta	GCA_009802435.1	GCA_009803635.1
Neurospora_discreta	GCA_009802435.1	GCA_009803645.1
Neurospora_discreta	GCA_009802435.1	GCA_009803775.1
Neurospora_discreta	GCA_009802435.1	GCA_009804105.1
Neurospora_discreta	GCA_009803745.1	GCA_009802365.1
Neurospora_discreta	GCA_009804765.1	GCA_009802365.1
Neurospora_discreta	GCA_009804785.1	GCA_009802365.1
Neurospora_discreta	GCA_009802365.1	GCA_009803905.1
Neurospora_discreta	GCA_009802365.1	GCA_009803635.1
Neurospora_discreta	GCA_009802365.1	GCA_009803645.1
Neurospora_discreta	GCA_009802365.1	GCA_009803775.1
Neurospora_discreta	GCA_009802365.1	GCA_009804105.1
Parastagonospora_avenae	GCA_003501975.1	GCA_003501955.1
Parastagonospora_avenae	GCA_003501975.1	GCA_003503125.1
Parastagonospora_avenae	GCA_003501975.1	GCA_003503205.1
Parastagonospora_avenae	GCA_003501975.1	GCA_003502015.1
Parastagonospora_avenae	GCA_003501975.1	GCA_003503165.1
Parastagonospora_avenae	GCA_003501975.1	GCA_003502495.1
Parastagonospora_avenae	GCA_003501975.1	GCA_003503195.1
Parastagonospora_avenae	GCA_003501975.1	GCA_003501935.1
Parastagonospora_avenae	GCA_003501955.1	GCA_003503115.1
Parastagonospora_avenae	GCA_003501955.1	GCA_003503125.1
Parastagonospora_avenae	GCA_003501955.1	GCA_003503205.1
Parastagonospora_avenae	GCA_003501955.1	GCA_003502015.1
Parastagonospora_avenae	GCA_003501955.1	GCA_003503165.1
Parastagonospora_avenae	GCA_003501955.1	GCA_003502495.1
Parastagonospora_avenae	GCA_003501955.1	GCA_003503195.1
Parastagonospora_avenae	GCA_003503115.1	GCA_003503125.1
Parastagonospora_avenae	GCA_003503115.1	GCA_003503205.1
Parastagonospora_avenae	GCA_003503115.1	GCA_003502015.1
Parastagonospora_avenae	GCA_003503115.1	GCA_003503165.1
Parastagonospora_avenae	GCA_003503115.1	GCA_003502495.1
Parastagonospora_avenae	GCA_003503115.1	GCA_003503195.1
Parastagonospora_avenae	GCA_003503115.1	GCA_003501935.1
Parastagonospora_avenae	GCA_003503125.1	GCA_003503205.1
Parastagonospora_avenae	GCA_003503125.1	GCA_003503165.1
Parastagonospora_avenae	GCA_003503125.1	GCA_003502495.1
Parastagonospora_avenae	GCA_003503125.1	GCA_003503195.1
Parastagonospora_avenae	GCA_003503125.1	GCA_003501935.1
Parastagonospora_avenae	GCA_003503205.1	GCA_003502015.1
Parastagonospora_avenae	GCA_003503205.1	GCA_003502495.1
Parastagonospora_avenae	GCA_003503205.1	GCA_003501935.1
Parastagonospora_avenae	GCA_003502015.1	GCA_003503165.1
Parastagonospora_avenae	GCA_003502015.1	GCA_003502495.1
Parastagonospora_avenae	GCA_003502015.1	GCA_003503195.1
Parastagonospora_avenae	GCA_003502015.1	GCA_003501935.1
Parastagonospora_avenae	GCA_003503165.1	GCA_003502495.1
Parastagonospora_avenae	GCA_003503165.1	GCA_003501935.1
Parastagonospora_avenae	GCA_003502495.1	GCA_003503195.1
Parastagonospora_avenae	GCA_003502495.1	GCA_003501935.1
Parastagonospora_avenae	GCA_003503195.1	GCA_003501935.1
Penicillium_expansum	GCA_004302965.1	GCA_002072455.1
Penicillium_expansum	GCA_000688875.1	GCA_002072455.1
Penicillium_expansum	GCA_000769735.1	GCA_002072455.1
Penicillium_expansum	GCA_000584915.1	GCA_002072455.1
Penicillium_expansum	GCA_000769755.1	GCA_002072455.1
Penicillium_expansum	GCA_002072455.1	GCA_001008385.1
Penicillium_expansum	GCA_002072455.1	GCA_000769745.1
Penicillium_expansum	GCA_002072455.1	GCA_001750045.2
Penicillium_solitum	GCA_002072235.1	GCA_001750005.1
Penicillium_solitum	GCA_002072235.1	GCA_000952775.2
Penicillium_solitum	GCA_001750005.1	GCA_000952775.2
Pleurotus_ostreatus	GCA_000697685.1	GCA_001956935.2
Pleurotus_ostreatus	GCA_003313235.2	GCA_001956935.2
Pleurotus_salmoneostramineus	GCA_001742905.1	GCA_002583695.1
Pleurotus_salmoneostramineus	GCA_001742905.1	GCA_002933715.1
Pyricularia_grisea	GCA_002925245.1	GCA_003933175.1
Pyricularia_grisea	GCA_002866905.1	GCA_003933175.1
Pyricularia_grisea	GCA_002871045.1	GCA_003933175.1
Pyricularia_grisea	GCA_004355905.1	GCA_003933175.1
Pyricularia_grisea	GCA_001548795.1	GCA_003933175.1
Pyricularia_grisea	GCA_002924675.1	GCA_003933175.1
Pyricularia_grisea	GCA_001548815.1	GCA_003933175.1
Rhizoctonia_solani	GCA_000350255.1	GCA_000695385.1
Rhizoctonia_solani	GCA_000350255.1	GCA_000334115.1
Rhizoctonia_solani	GCA_000350255.1	GCA_900185085.1
Rhizoctonia_solani	GCA_000350255.1	GCA_000715385.1
Rhizoctonia_solani	GCA_000350255.1	GCA_000524645.1
Rhizoctonia_solani	GCA_000350255.1	GCA_001899475.2
Rhizoctonia_solani	GCA_000350255.1	GCA_003268435.1
Rhizoctonia_solani	GCA_000350255.1	GCA_001286725.1
Rhizoctonia_solani	GCA_000695385.1	GCA_000334115.1
Rhizoctonia_solani	GCA_000695385.1	GCA_000832345.2
Rhizoctonia_solani	GCA_000695385.1	GCA_900185085.1
Rhizoctonia_solani	GCA_000695385.1	GCA_000715385.1
Rhizoctonia_solani	GCA_000695385.1	GCA_000524645.1
Rhizoctonia_solani	GCA_000695385.1	GCA_001899475.2
Rhizoctonia_solani	GCA_000695385.1	GCA_003268435.1
Rhizoctonia_solani	GCA_000695385.1	GCA_001286725.1
Rhizoctonia_solani	GCA_000334115.1	GCA_000832345.2
Rhizoctonia_solani	GCA_000334115.1	GCA_900185085.1
Rhizoctonia_solani	GCA_000334115.1	GCA_000715385.1
Rhizoctonia_solani	GCA_000334115.1	GCA_000524645.1
Rhizoctonia_solani	GCA_000334115.1	GCA_003268435.1
Rhizoctonia_solani	GCA_000334115.1	GCA_001286725.1
Rhizoctonia_solani	GCA_000832345.2	GCA_900185085.1
Rhizoctonia_solani	GCA_000832345.2	GCA_000715385.1
Rhizoctonia_solani	GCA_000832345.2	GCA_000524645.1
Rhizoctonia_solani	GCA_000832345.2	GCA_001899475.2
Rhizoctonia_solani	GCA_000832345.2	GCA_003268435.1
Rhizoctonia_solani	GCA_000832345.2	GCA_001286725.1
Rhizoctonia_solani	GCA_900185085.1	GCA_001899475.2
Rhizoctonia_solani	GCA_900185085.1	GCA_001286725.1
Rhizoctonia_solani	GCA_000715385.1	GCA_001899475.2
Rhizoctonia_solani	GCA_000715385.1	GCA_001286725.1
Rhizoctonia_solani	GCA_000524645.1	GCA_001899475.2
Rhizoctonia_solani	GCA_000524645.1	GCA_001286725.1
Rhizoctonia_solani	GCA_001899475.2	GCA_003268435.1
Rhizoctonia_solani	GCA_001899475.2	GCA_001286725.1
Rhizoctonia_solani	GCA_003268435.1	GCA_001286725.1
Rhizopogon_sp_AM2018a	GCA_002994855.1	GCA_002995095.1
Rhizopogon_sp_AM2018a	GCA_002994855.1	GCA_002994955.1
Rhizopogon_sp_AM2018a	GCA_002994855.1	GCA_002995235.1
Rhizopogon_sp_AM2018a	GCA_002994855.1	GCA_002995135.1
Rhizopogon_sp_AM2018a	GCA_002995095.1	GCA_002994955.1
Rhizopogon_sp_AM2018a	GCA_002995095.1	GCA_002995135.1
Rhizopogon_sp_AM2018a	GCA_002994955.1	GCA_002995235.1
Rhizopogon_sp_AM2018a	GCA_002995235.1	GCA_002995135.1
Rhizopus_microsporus	GCA_000825725.1	GCA_002083745.1
Rhizopus_microsporus	GCA_000825725.1	GCA_000697275.1
Rhizopus_microsporus	GCA_000825725.1	GCA_002708625.1
Rhizopus_microsporus	GCA_000325505.1	GCA_002083745.1
Rhizopus_microsporus	GCA_000325505.1	GCA_000697275.1
Rhizopus_microsporus	GCA_000325505.1	GCA_002708625.1
Rhizopus_microsporus	GCA_002083745.1	GCA_006680115.1
Rhizopus_microsporus	GCA_002083745.1	GCA_000697275.1
Rhizopus_microsporus	GCA_002083745.1	GCA_002083735.1
Rhizopus_microsporus	GCA_002083745.1	GCA_000738565.1
Rhizopus_microsporus	GCA_006680115.1	GCA_000697275.1
Rhizopus_microsporus	GCA_006680115.1	GCA_002708625.1
Rhizopus_microsporus	GCA_000697275.1	GCA_900000135.1
Rhizopus_microsporus	GCA_000697275.1	GCA_002708625.1
Rhizopus_microsporus	GCA_000697275.1	GCA_002083735.1
Rhizopus_microsporus	GCA_002708625.1	GCA_002083735.1
Rhizopus_microsporus	GCA_002708625.1	GCA_000738565.1
Rhodotorula_toruloides	GCA_007990605.1	GCA_001456015.1
Rhodotorula_toruloides	GCA_007990605.1	GCA_005387725.1
Rhodotorula_toruloides	GCA_007990605.1	GCA_001542265.1
Rhodotorula_toruloides	GCA_007990605.1	GCA_001600115.1
Rhodotorula_toruloides	GCA_007990605.1	GCA_001600155.1
Rhodotorula_toruloides	GCA_007990605.1	GCA_000222205.2
Rhodotorula_toruloides	GCA_007990605.1	GCA_001255795.1
Rhodotorula_toruloides	GCA_007990605.1	GCA_000258745.1
Rhodotorula_toruloides	GCA_007990605.1	GCA_000988875.2
Rhodotorula_toruloides	GCA_001456015.1	GCA_005387725.1
Rhodotorula_toruloides	GCA_005387725.1	GCA_001542265.1
Rhodotorula_toruloides	GCA_005387725.1	GCA_001600115.1
Rhodotorula_toruloides	GCA_005387725.1	GCA_001600155.1
Rhodotorula_toruloides	GCA_005387725.1	GCA_000222205.2
Rhodotorula_toruloides	GCA_005387725.1	GCA_001255795.1
Rhodotorula_toruloides	GCA_005387725.1	GCA_000258745.1
Rhodotorula_toruloides	GCA_005387725.1	GCA_000988875.2
Rhodotorula_toruloides	GCA_001542265.1	GCA_001600115.1
Rhodotorula_toruloides	GCA_001542265.1	GCA_001600155.1
Rhodotorula_toruloides	GCA_001542265.1	GCA_000258745.1
Rhodotorula_toruloides	GCA_001600115.1	GCA_000222205.2
Rhodotorula_toruloides	GCA_001600115.1	GCA_001255795.1
Rhodotorula_toruloides	GCA_001600115.1	GCA_000988875.2
Rhodotorula_toruloides	GCA_001600155.1	GCA_000222205.2
Rhodotorula_toruloides	GCA_001600155.1	GCA_001255795.1
Rhodotorula_toruloides	GCA_001600155.1	GCA_000988875.2
Rhodotorula_toruloides	GCA_000222205.2	GCA_000258745.1
Rhodotorula_toruloides	GCA_001255795.1	GCA_000258745.1
Rhodotorula_toruloides	GCA_000258745.1	GCA_000988875.2
Saccharomyces_cerevisiae	GCA_009667515.1	GCA_009667055.1
Saccharomyces_cerevisiae	GCA_009667515.1	GCA_009666875.1
Saccharomyces_cerevisiae	GCA_009667515.1	GCA_009666495.1
Saccharomyces_cerevisiae	GCA_009667515.1	GCA_009665985.1
Saccharomyces_cerevisiae	GCA_009667515.1	GCA_000326105.1
Saccharomyces_cerevisiae	GCA_009667515.1	GCA_009667545.1
Saccharomyces_cerevisiae	GCA_009667515.1	GCA_009666265.1
Saccharomyces_cerevisiae	GCA_009667515.1	GCA_009667415.1
Saccharomyces_cerevisiae	GCA_009667515.1	GCA_009665535.1
Saccharomyces_cerevisiae	GCA_009667515.1	GCA_009665545.1
Saccharomyces_cerevisiae	GCA_009667515.1	GCA_003273395.1
Saccharomyces_cerevisiae	GCA_009667515.1	GCA_003274975.1
Saccharomyces_cerevisiae	GCA_009667515.1	GCA_001739075.1
Saccharomyces_cerevisiae	GCA_009667515.1	GCA_001671625.1
Saccharomyces_cerevisiae	GCA_009667515.1	GCA_002250225.1
Saccharomyces_cerevisiae	GCA_009667515.1	GCA_900178365.1
Saccharomyces_cerevisiae	GCA_009667515.1	GCA_001741705.1
Saccharomyces_cerevisiae	GCA_009667515.1	GCA_003272315.1
Saccharomyces_cerevisiae_x_Saccharomyces_eubayanus	GCA_009667515.1	GCA_009667055.1
Saccharomyces_cerevisiae_x_Saccharomyces_eubayanus	GCA_009667515.1	GCA_009666875.1
Saccharomyces_cerevisiae_x_Saccharomyces_eubayanus	GCA_009667515.1	GCA_009666495.1
Saccharomyces_eubayanus	GCA_001515405.2	GCA_009666335.1
Saccharomyces_eubayanus	GCA_001515405.2	GCA_009666905.1
Saccharomyces_eubayanus	GCA_001515405.2	GCA_009667055.1
Saccharomyces_eubayanus	GCA_001515405.2	GCA_009666875.1
Saccharomyces_eubayanus	GCA_001515405.2	GCA_009666495.1
Saccharomyces_eubayanus	GCA_001298625.1	GCA_009666335.1
Saccharomyces_eubayanus	GCA_001298625.1	GCA_009666905.1
Saccharomyces_eubayanus	GCA_001298625.1	GCA_009667055.1
Saccharomyces_eubayanus	GCA_001298625.1	GCA_009666875.1
Saccharomyces_eubayanus	GCA_001298625.1	GCA_009666495.1
Saccharomyces_eubayanus	GCA_003327605.1	GCA_009666335.1
Saccharomyces_eubayanus	GCA_003327605.1	GCA_009666905.1
Saccharomyces_eubayanus	GCA_003327605.1	GCA_009667055.1
Saccharomyces_eubayanus	GCA_003327605.1	GCA_009666875.1
Saccharomyces_eubayanus	GCA_003327605.1	GCA_009666495.1
Saccharomyces_eubayanus	GCA_009666145.1	GCA_009667385.1
Saccharomyces_eubayanus	GCA_009666145.1	GCA_009666335.1
Saccharomyces_eubayanus	GCA_009666145.1	GCA_009666905.1
Saccharomyces_eubayanus	GCA_009666145.1	GCA_009666865.1
Saccharomyces_eubayanus	GCA_009666095.1	GCA_009667385.1
Saccharomyces_eubayanus	GCA_009666095.1	GCA_009666335.1
Saccharomyces_eubayanus	GCA_009666095.1	GCA_009666905.1
Saccharomyces_eubayanus	GCA_009666095.1	GCA_009666865.1
Saccharomyces_eubayanus	GCA_009667515.1	GCA_009666335.1
Saccharomyces_eubayanus	GCA_009667515.1	GCA_009666905.1
Saccharomyces_eubayanus	GCA_009667515.1	GCA_009666865.1
Saccharomyces_eubayanus	GCA_009667515.1	GCA_009667055.1
Saccharomyces_eubayanus	GCA_009667515.1	GCA_009666875.1
Saccharomyces_eubayanus	GCA_009667515.1	GCA_009666495.1
Saccharomyces_eubayanus	GCA_009665555.1	GCA_009667385.1
Saccharomyces_eubayanus	GCA_009665555.1	GCA_009666335.1
Saccharomyces_eubayanus	GCA_009665555.1	GCA_009666905.1
Saccharomyces_eubayanus	GCA_009665555.1	GCA_009666865.1
Saccharomyces_eubayanus	GCA_009666015.1	GCA_009667385.1
Saccharomyces_eubayanus	GCA_009666015.1	GCA_009666335.1
Saccharomyces_eubayanus	GCA_009666015.1	GCA_009666905.1
Saccharomyces_eubayanus	GCA_009666015.1	GCA_009666865.1
Saccharomyces_eubayanus	GCA_009665685.1	GCA_009667385.1
Saccharomyces_eubayanus	GCA_009665685.1	GCA_009666335.1
Saccharomyces_eubayanus	GCA_009665685.1	GCA_009666905.1
Saccharomyces_eubayanus	GCA_009665685.1	GCA_009666865.1
Saccharomyces_eubayanus	GCA_009667345.1	GCA_009666335.1
Saccharomyces_eubayanus	GCA_009667345.1	GCA_009666905.1
Saccharomyces_eubayanus	GCA_009667345.1	GCA_009666865.1
Saccharomyces_eubayanus	GCA_009666185.1	GCA_009667385.1
Saccharomyces_eubayanus	GCA_009666185.1	GCA_009666335.1
Saccharomyces_eubayanus	GCA_009666185.1	GCA_009666905.1
Saccharomyces_eubayanus	GCA_009666185.1	GCA_009666865.1
Saccharomyces_eubayanus	GCA_009665705.1	GCA_009667385.1
Saccharomyces_eubayanus	GCA_009665705.1	GCA_009666335.1
Saccharomyces_eubayanus	GCA_009665705.1	GCA_009666905.1
Saccharomyces_eubayanus	GCA_009665705.1	GCA_009666865.1
Saccharomyces_eubayanus	GCA_009666635.1	GCA_009667385.1
Saccharomyces_eubayanus	GCA_009666635.1	GCA_009666335.1
Saccharomyces_eubayanus	GCA_009666635.1	GCA_009666905.1
Saccharomyces_eubayanus	GCA_009666635.1	GCA_009666865.1
Saccharomyces_eubayanus	GCA_009667385.1	GCA_009667055.1
Saccharomyces_eubayanus	GCA_009667385.1	GCA_009666875.1
Saccharomyces_eubayanus	GCA_009667385.1	GCA_009666495.1
Saccharomyces_eubayanus	GCA_009666765.1	GCA_009667055.1
Saccharomyces_eubayanus	GCA_009666765.1	GCA_009666875.1
Saccharomyces_eubayanus	GCA_009666765.1	GCA_009666495.1
Saccharomyces_eubayanus	GCA_009666405.1	GCA_009666875.1
Saccharomyces_eubayanus	GCA_009667275.1	GCA_009667055.1
Saccharomyces_eubayanus	GCA_009667275.1	GCA_009666875.1
Saccharomyces_eubayanus	GCA_009667275.1	GCA_009666495.1
Saccharomyces_eubayanus	GCA_009666585.1	GCA_009667055.1
Saccharomyces_eubayanus	GCA_009666585.1	GCA_009666875.1
Saccharomyces_eubayanus	GCA_009666585.1	GCA_009666495.1
Saccharomyces_eubayanus	GCA_009667145.1	GCA_009667055.1
Saccharomyces_eubayanus	GCA_009667145.1	GCA_009666875.1
Saccharomyces_eubayanus	GCA_009667145.1	GCA_009666495.1
Saccharomyces_eubayanus	GCA_009667075.1	GCA_009667055.1
Saccharomyces_eubayanus	GCA_009667075.1	GCA_009666875.1
Saccharomyces_eubayanus	GCA_009667075.1	GCA_009666495.1
Saccharomyces_kudriavzevii	GCA_000256785.1	GCA_000257065.1
Saccharomyces_kudriavzevii	GCA_000256785.1	GCA_000257085.1
Saccharomyces_kudriavzevii	GCA_000256785.1	GCA_000167075.2
Saccharomyces_kudriavzevii	GCA_000256785.1	GCA_900682695.1
Saccharomyces_kudriavzevii	GCA_000256785.1	GCA_009667055.1
Saccharomyces_kudriavzevii	GCA_000256785.1	GCA_009666875.1
Saccharomyces_kudriavzevii	GCA_000256785.1	GCA_009666495.1
Saccharomyces_kudriavzevii	GCA_000256785.1	GCA_009665985.1
Saccharomyces_kudriavzevii	GCA_000256785.1	GCA_000326105.1
Saccharomyces_kudriavzevii	GCA_000256785.1	GCA_009667545.1
Saccharomyces_kudriavzevii	GCA_000256785.1	GCA_009666265.1
Saccharomyces_kudriavzevii	GCA_000256785.1	GCA_009667415.1
Saccharomyces_kudriavzevii	GCA_000256785.1	GCA_009665535.1
Saccharomyces_kudriavzevii	GCA_000256785.1	GCA_009665545.1
Saccharomyces_kudriavzevii	GCA_000256785.1	GCA_003004545.1
Saccharomyces_kudriavzevii	GCA_000257065.1	GCA_000256845.1
Saccharomyces_kudriavzevii	GCA_000257065.1	GCA_000257025.1
Saccharomyces_kudriavzevii	GCA_000257065.1	GCA_000256885.1
Saccharomyces_kudriavzevii	GCA_000257065.1	GCA_000257005.1
Saccharomyces_kudriavzevii	GCA_000257065.1	GCA_009667055.1
Saccharomyces_kudriavzevii	GCA_000257065.1	GCA_009666875.1
Saccharomyces_kudriavzevii	GCA_000257065.1	GCA_009666495.1
Saccharomyces_kudriavzevii	GCA_000257065.1	GCA_009665985.1
Saccharomyces_kudriavzevii	GCA_000257065.1	GCA_000326105.1
Saccharomyces_kudriavzevii	GCA_000257065.1	GCA_009667545.1
Saccharomyces_kudriavzevii	GCA_000257065.1	GCA_009666265.1
Saccharomyces_kudriavzevii	GCA_000257065.1	GCA_009667415.1
Saccharomyces_kudriavzevii	GCA_000257065.1	GCA_009665535.1
Saccharomyces_kudriavzevii	GCA_000257065.1	GCA_009665545.1
Saccharomyces_kudriavzevii	GCA_000257065.1	GCA_003004545.1
Saccharomyces_kudriavzevii	GCA_000256845.1	GCA_009667055.1
Saccharomyces_kudriavzevii	GCA_000256845.1	GCA_009666875.1
Saccharomyces_kudriavzevii	GCA_000256845.1	GCA_009666495.1
Saccharomyces_kudriavzevii	GCA_000256845.1	GCA_009665985.1
Saccharomyces_kudriavzevii	GCA_000256845.1	GCA_000326105.1
Saccharomyces_kudriavzevii	GCA_000256845.1	GCA_009667545.1
Saccharomyces_kudriavzevii	GCA_000256845.1	GCA_009666265.1
Saccharomyces_kudriavzevii	GCA_000256845.1	GCA_009667415.1
Saccharomyces_kudriavzevii	GCA_000256845.1	GCA_009665535.1
Saccharomyces_kudriavzevii	GCA_000256845.1	GCA_009665545.1
Saccharomyces_kudriavzevii	GCA_000256845.1	GCA_003004545.1
Saccharomyces_kudriavzevii	GCA_000257085.1	GCA_009667055.1
Saccharomyces_kudriavzevii	GCA_000257085.1	GCA_009666875.1
Saccharomyces_kudriavzevii	GCA_000257085.1	GCA_009666495.1
Saccharomyces_kudriavzevii	GCA_000257085.1	GCA_009665985.1
Saccharomyces_kudriavzevii	GCA_000257085.1	GCA_009667545.1
Saccharomyces_kudriavzevii	GCA_000257085.1	GCA_009666265.1
Saccharomyces_kudriavzevii	GCA_000257085.1	GCA_009667415.1
Saccharomyces_kudriavzevii	GCA_000257085.1	GCA_009665535.1
Saccharomyces_kudriavzevii	GCA_000257085.1	GCA_009665545.1
Saccharomyces_kudriavzevii	GCA_000257085.1	GCA_003004545.1
Saccharomyces_kudriavzevii	GCA_000257045.1	GCA_009667055.1
Saccharomyces_kudriavzevii	GCA_000257045.1	GCA_009666875.1
Saccharomyces_kudriavzevii	GCA_000257045.1	GCA_009666495.1
Saccharomyces_kudriavzevii	GCA_000257045.1	GCA_009665985.1
Saccharomyces_kudriavzevii	GCA_000257045.1	GCA_009667545.1
Saccharomyces_kudriavzevii	GCA_000257045.1	GCA_009666265.1
Saccharomyces_kudriavzevii	GCA_000257045.1	GCA_009665535.1
Saccharomyces_kudriavzevii	GCA_000257045.1	GCA_009665545.1
Saccharomyces_kudriavzevii	GCA_000257045.1	GCA_003004545.1
Saccharomyces_kudriavzevii	GCA_000257025.1	GCA_009667055.1
Saccharomyces_kudriavzevii	GCA_000257025.1	GCA_009666875.1
Saccharomyces_kudriavzevii	GCA_000257025.1	GCA_009666495.1
Saccharomyces_kudriavzevii	GCA_000257025.1	GCA_009665985.1
Saccharomyces_kudriavzevii	GCA_000257025.1	GCA_000326105.1
Saccharomyces_kudriavzevii	GCA_000257025.1	GCA_009667545.1
Saccharomyces_kudriavzevii	GCA_000257025.1	GCA_009666265.1
Saccharomyces_kudriavzevii	GCA_000257025.1	GCA_009667415.1
Saccharomyces_kudriavzevii	GCA_000257025.1	GCA_009665535.1
Saccharomyces_kudriavzevii	GCA_000257025.1	GCA_009665545.1
Saccharomyces_kudriavzevii	GCA_000257025.1	GCA_003004545.1
Saccharomyces_kudriavzevii	GCA_000167075.2	GCA_009667055.1
Saccharomyces_kudriavzevii	GCA_000167075.2	GCA_009666875.1
Saccharomyces_kudriavzevii	GCA_000167075.2	GCA_009666495.1
Saccharomyces_kudriavzevii	GCA_000167075.2	GCA_009665985.1
Saccharomyces_kudriavzevii	GCA_000167075.2	GCA_009667545.1
Saccharomyces_kudriavzevii	GCA_000167075.2	GCA_009666265.1
Saccharomyces_kudriavzevii	GCA_000167075.2	GCA_009665535.1
Saccharomyces_kudriavzevii	GCA_000167075.2	GCA_009665545.1
Saccharomyces_kudriavzevii	GCA_000167075.2	GCA_003004545.1
Saccharomyces_kudriavzevii	GCA_900682695.1	GCA_009667055.1
Saccharomyces_kudriavzevii	GCA_900682695.1	GCA_009666495.1
Saccharomyces_kudriavzevii	GCA_900682695.1	GCA_009666265.1
Saccharomyces_kudriavzevii	GCA_900682695.1	GCA_009665545.1
Saccharomyces_kudriavzevii	GCA_900682695.1	GCA_003004545.1
Saccharomyces_kudriavzevii	GCA_000256885.1	GCA_009667055.1
Saccharomyces_kudriavzevii	GCA_000256885.1	GCA_009666875.1
Saccharomyces_kudriavzevii	GCA_000256885.1	GCA_009666495.1
Saccharomyces_kudriavzevii	GCA_000256885.1	GCA_009665985.1
Saccharomyces_kudriavzevii	GCA_000256885.1	GCA_000326105.1
Saccharomyces_kudriavzevii	GCA_000256885.1	GCA_009667545.1
Saccharomyces_kudriavzevii	GCA_000256885.1	GCA_009666265.1
Saccharomyces_kudriavzevii	GCA_000256885.1	GCA_009667415.1
Saccharomyces_kudriavzevii	GCA_000256885.1	GCA_009665535.1
Saccharomyces_kudriavzevii	GCA_000256885.1	GCA_009665545.1
Saccharomyces_kudriavzevii	GCA_000256885.1	GCA_003004545.1
Saccharomyces_kudriavzevii	GCA_000257005.1	GCA_009667055.1
Saccharomyces_kudriavzevii	GCA_000257005.1	GCA_009666875.1
Saccharomyces_kudriavzevii	GCA_000257005.1	GCA_009666495.1
Saccharomyces_kudriavzevii	GCA_000257005.1	GCA_009665985.1
Saccharomyces_kudriavzevii	GCA_000257005.1	GCA_009667545.1
Saccharomyces_kudriavzevii	GCA_000257005.1	GCA_009666265.1
Saccharomyces_kudriavzevii	GCA_000257005.1	GCA_009667415.1
Saccharomyces_kudriavzevii	GCA_000257005.1	GCA_009665535.1
Saccharomyces_kudriavzevii	GCA_000257005.1	GCA_009665545.1
Saccharomyces_kudriavzevii	GCA_000257005.1	GCA_003004545.1
Saccharomyces_pastorianus	GCA_002557695.1	GCA_003004515.1
Saccharomyces_pastorianus	GCA_003004515.1	GCA_001515445.2
Saccharomyces_pastorianus	GCA_003004515.1	GCA_000586595.1
Saccharomyces_uvarum	GCA_009667385.1	GCA_009667055.1
Saccharomyces_uvarum	GCA_009667385.1	GCA_009666875.1
Saccharomyces_uvarum	GCA_009667385.1	GCA_009666495.1
Saccharomyces_uvarum	GCA_009666765.1	GCA_009667055.1
Saccharomyces_uvarum	GCA_009666765.1	GCA_009666875.1
Saccharomyces_uvarum	GCA_009666765.1	GCA_009666495.1
Saccharomyces_uvarum	GCA_009666405.1	GCA_009666875.1
Saccharomyces_uvarum	GCA_009667275.1	GCA_009667055.1
Saccharomyces_uvarum	GCA_009667275.1	GCA_009666875.1
Saccharomyces_uvarum	GCA_009667275.1	GCA_009666495.1
Saccharomyces_uvarum	GCA_009666585.1	GCA_009667055.1
Saccharomyces_uvarum	GCA_009666585.1	GCA_009666875.1
Saccharomyces_uvarum	GCA_009666585.1	GCA_009666495.1
Saccharomyces_uvarum	GCA_009667145.1	GCA_009667055.1
Saccharomyces_uvarum	GCA_009667145.1	GCA_009666875.1
Saccharomyces_uvarum	GCA_009667145.1	GCA_009666495.1
Saccharomyces_uvarum	GCA_009667075.1	GCA_009667055.1
Saccharomyces_uvarum	GCA_009667075.1	GCA_009666875.1
Saccharomyces_uvarum	GCA_009667075.1	GCA_009666495.1
Saitozyma_podzolica	GCA_902501155.1	GCA_902501335.1
Saitozyma_podzolica	GCA_902501155.1	GCA_902501265.1
Saitozyma_podzolica	GCA_902501155.1	GCA_902501425.1
Saitozyma_podzolica	GCA_902501155.1	GCA_902501395.1
Schizophyllum_commune	GCA_009746445.1	GCA_001599475.1
Schizophyllum_commune	GCA_009746445.1	GCA_003313685.1
Schizophyllum_commune	GCA_009746445.1	GCA_009746475.1
Schizophyllum_commune	GCA_009746445.1	GCA_009746485.1
Schizophyllum_commune	GCA_009746445.1	GCA_009746505.1
Schizophyllum_commune	GCA_009746445.1	GCA_000143185.1
Schizophyllum_commune	GCA_001599475.1	GCA_003313685.1
Schizophyllum_commune	GCA_001599475.1	GCA_009746475.1
Schizophyllum_commune	GCA_001599475.1	GCA_009746485.1
Schizophyllum_commune	GCA_001599475.1	GCA_009746505.1
Schizophyllum_commune	GCA_001599475.1	GCA_000143185.1
Schizophyllum_commune	GCA_003313685.1	GCA_009746475.1
Schizophyllum_commune	GCA_003313685.1	GCA_009746485.1
Schizophyllum_commune	GCA_003313685.1	GCA_009746505.1
Schizophyllum_commune	GCA_003313685.1	GCA_000143185.1
Schizophyllum_commune	GCA_009746475.1	GCA_009746485.1
Schizophyllum_commune	GCA_009746475.1	GCA_000143185.1
Schizophyllum_commune	GCA_009746485.1	GCA_009746505.1
Schizophyllum_commune	GCA_009746485.1	GCA_000143185.1
Schizophyllum_commune	GCA_009746505.1	GCA_000143185.1
Serpula_lacrymans	GCA_002891375.1	GCA_002891385.1
Serpula_lacrymans	GCA_002891385.1	GCA_000218685.1
Serpula_lacrymans	GCA_002891385.1	GCA_000218725.1
Starmerella_bombicola	GCA_004124885.1	GCA_003033785.1
Starmerella_bombicola	GCA_000950655.1	GCA_003033785.1
Starmerella_bombicola	GCA_001599315.1	GCA_003033785.1
Synchytrium_endobioticum	GCA_001399855.1	GCA_006535955.1
Synchytrium_endobioticum	GCA_001399855.1	GCA_006536045.1
Trichoderma_harzianum	GCA_001990665.1	GCA_002894145.1
Trichoderma_harzianum	GCA_001990665.1	GCA_000988865.1
Trichoderma_harzianum	GCA_001990665.1	GCA_010015525.1
Trichoderma_harzianum	GCA_002894145.1	GCA_000988865.1
Trichoderma_harzianum	GCA_002894145.1	GCA_002838845.1
Trichoderma_harzianum	GCA_002894145.1	GCA_010015525.1
Trichoderma_harzianum	GCA_002894145.1	GCA_003025095.1
Trichoderma_harzianum	GCA_000988865.1	GCA_002838845.1
Trichoderma_harzianum	GCA_000988865.1	GCA_003025095.1
Trichoderma_harzianum	GCA_002838845.1	GCA_010015525.1
Trichoderma_harzianum	GCA_010015525.1	GCA_003025095.1
Trichosporon_inkin	GCA_004023515.1	GCA_004011275.1
Trichosporon_inkin	GCA_001752625.1	GCA_004011275.1
Wickerhamiella_versatilis	GCA_001600375.1	GCA_001659765.1
Wickerhamiella_versatilis	GCA_001659765.1	GCA_004125065.1
Yarrowia_lipolytica	GCA_003698155.1	GCA_001069125.1
Yarrowia_lipolytica	GCA_003698155.1	GCA_003571375.1
Yarrowia_lipolytica	GCA_003367925.1	GCA_001069125.1
Yarrowia_lipolytica	GCA_003367925.1	GCA_003571375.1
Yarrowia_lipolytica	GCA_003571385.1	GCA_001069125.1
Yarrowia_lipolytica	GCA_003571385.1	GCA_003571375.1
Yarrowia_lipolytica	GCA_003367845.1	GCA_001069125.1
Yarrowia_lipolytica	GCA_003367845.1	GCA_003571375.1
Yarrowia_lipolytica	GCA_009194645.1	GCA_001069125.1
Yarrowia_lipolytica	GCA_009194645.1	GCA_003571375.1
Yarrowia_lipolytica	GCA_003054345.1	GCA_001069125.1
Yarrowia_lipolytica	GCA_003054345.1	GCA_003571375.1
Yarrowia_lipolytica	GCA_001069125.1	GCA_003571375.1
Yarrowia_lipolytica	GCA_001069125.1	GCA_003054305.1
Yarrowia_lipolytica	GCA_001069125.1	GCA_009372015.1
Yarrowia_lipolytica	GCA_003571375.1	GCA_003054305.1
Yarrowia_lipolytica	GCA_003571375.1	GCA_009372015.1

## Sheet: genus
Pairs of different species of the same genus with smaller within-pair genome distance than the species-genus threshold as determined by dashing on the fungal genomes whole GenBank database
Alternaria	Alternaria_tenuissima	GCA_004168565.1*	Alternaria_arborescens	GCA_000256225.1*	*GenBank accession numbers of genomic assemblies
Alternaria	Alternaria_tenuissima	GCA_004168565.1	Alternaria_arborescens	GCA_004634205.1		Pairs of species with smaller genomic distance than expected (at least one genome pair below the threshold)
Alternaria	Alternaria_tenuissima	GCA_004168565.1	Alternaria_arborescens	GCA_004154835.1		Unique pairs in the list
Alternaria	Alternaria_tenuissima	GCA_004168565.1	Alternaria_arborescens	GCA_004155955.1		Alternaria_arborescens	Alternaria_alternata
Alternaria	Alternaria_tenuissima	GCA_004168565.1	Alternaria_arborescens	GCA_004154815.1		Alternaria_tenuissima	Alternaria_alternata
Alternaria	Alternaria_tenuissima	GCA_004168565.1	Alternaria_alternata	GCA_001642055.1		Alternaria_tenuissima	Alternaria_arborescens
Alternaria	Alternaria_tenuissima	GCA_004168565.1	Alternaria_alternata	GCA_004634295.1		Aspergillus_flavus	Aspergillus_oryzae
Alternaria	Alternaria_tenuissima	GCA_004168565.1	Alternaria_alternata	GCA_001696825.1		Aspergillus_flavus	Aspergillus_parasiticus
Alternaria	Alternaria_tenuissima	GCA_004168565.1	Alternaria_alternata	GCA_001572055.1		Aspergillus_oryzae	Aspergillus_parasiticus
Alternaria	Alternaria_tenuissima	GCA_004168565.1	Alternaria_alternata	GCA_004154755.1		Aspergillus_sojae	Aspergillus_flavus
Alternaria	Alternaria_tenuissima	GCA_004168565.1	Alternaria_alternata	GCA_001443195.1		Aspergillus_sojae	Aspergillus_oryzae
Alternaria	Alternaria_tenuissima	GCA_004168565.1	Alternaria_alternata	GCA_009650635.1		Aspergillus_sojae	Aspergillus_parasiticus
Alternaria	Alternaria_tenuissima	GCA_004168565.1	Alternaria_alternata	GCA_009932595.1		Blastomyces_percursus	Blastomyces_sp_MA2018
Alternaria	Alternaria_tenuissima	GCA_004156015.1	Alternaria_arborescens	GCA_000256225.1		Calonectria_henricotiae	Calonectria_pseudonaviculata
Alternaria	Alternaria_tenuissima	GCA_004156015.1	Alternaria_arborescens	GCA_004634205.1		Coccidioides_posadasii	Coccidioides
Alternaria	Alternaria_tenuissima	GCA_004156015.1	Alternaria_arborescens	GCA_004154835.1		Colletotrichum_gloeosporioides	Colletotrichum_fructicola
Alternaria	Alternaria_tenuissima	GCA_004156015.1	Alternaria_arborescens	GCA_004155955.1		Cryptococcus_gattii_VGII	Cryptococcus_gattii_VGI
Alternaria	Alternaria_tenuissima	GCA_004156015.1	Alternaria_arborescens	GCA_004154815.1		Fusarium_fujikuroi	Fusarium_proliferatum
Alternaria	Alternaria_tenuissima	GCA_004156015.1	Alternaria_alternata	GCA_001642055.1		Fusarium_meridionale	Fusarium_graminearum
Alternaria	Alternaria_tenuissima	GCA_004156015.1	Alternaria_alternata	GCA_004634295.1		Fusarium_pseudograminearum	Fusarium_graminearum
Alternaria	Alternaria_tenuissima	GCA_004156015.1	Alternaria_alternata	GCA_001696825.1		Fusarium_pseudograminearum	Fusarium_meridionale
Alternaria	Alternaria_tenuissima	GCA_004156015.1	Alternaria_alternata	GCA_001572055.1		Fusarium_tucumaniae	Fusarium_virguliforme
Alternaria	Alternaria_tenuissima	GCA_004156015.1	Alternaria_alternata	GCA_004154755.1		Heterobasidion_annosum	Heterobasidion_irregulare
Alternaria	Alternaria_tenuissima	GCA_004156015.1	Alternaria_alternata	GCA_001443195.1		Komagataella_phaffii	Komagataella_pastoris
Alternaria	Alternaria_tenuissima	GCA_004156015.1	Alternaria_alternata	GCA_009650635.1		Metschnikowia_bowlesiae	Metschnikowia_dekortorum
Alternaria	Alternaria_tenuissima	GCA_004156015.1	Alternaria_alternata	GCA_009932595.1		Meyerozyma_guilliermondii	Meyerozyma_caribbica
Alternaria	Alternaria_tenuissima	GCA_004154745.1	Alternaria_arborescens	GCA_000256225.1		Microbotryum_lychnidisdioicae	Microbotryum_saponariae
Alternaria	Alternaria_tenuissima	GCA_004154745.1	Alternaria_arborescens	GCA_004634205.1		Microbotryum_lychnidisdioicae	Microbotryum_violaceum
Alternaria	Alternaria_tenuissima	GCA_004154745.1	Alternaria_arborescens	GCA_004154835.1		Neurospora_sp_CHS2018a	Neurospora_sp_CHS2018b
Alternaria	Alternaria_tenuissima	GCA_004154745.1	Alternaria_arborescens	GCA_004155955.1		Neurospora_sp_CHS2018a	Neurospora_sp_CHS2018c
Alternaria	Alternaria_tenuissima	GCA_004154745.1	Alternaria_arborescens	GCA_004154815.1		Neurospora_sp_CHS2018b	Neurospora_sp_CHS2018c
Alternaria	Alternaria_tenuissima	GCA_004154745.1	Alternaria_alternata	GCA_001642055.1		Penicillium_expansum	Penicillium_oxalicum
Alternaria	Alternaria_tenuissima	GCA_004154745.1	Alternaria_alternata	GCA_004634295.1		Rhizopogon_rudus	Rhizopogon_sp_AM2018a
Alternaria	Alternaria_tenuissima	GCA_004154745.1	Alternaria_alternata	GCA_001696825.1		Rhizopus_oryzae	Rhizopus_delemar
Alternaria	Alternaria_tenuissima	GCA_004154745.1	Alternaria_alternata	GCA_001572055.1		Saccharomyces_cerevisiae_x_Saccharomyces_eubayanus	Saccharomyces_cerevisiae
Alternaria	Alternaria_tenuissima	GCA_004154745.1	Alternaria_alternata	GCA_004154755.1		Saccharomyces_cerevisiae_x_Saccharomyces_eubayanus	Saccharomyces_cerevisiae_x_Saccharomyces_eubayanus_x_Saccharomyces_kudriavzevii_x_Saccharomyces_uvarum
Alternaria	Alternaria_tenuissima	GCA_004154745.1	Alternaria_alternata	GCA_001443195.1		Saccharomyces_cerevisiae_x_Saccharomyces_eubayanus	Saccharomyces_cerevisiae_x_Saccharomyces_kudriavzevii
Alternaria	Alternaria_tenuissima	GCA_004154745.1	Alternaria_alternata	GCA_009650635.1		Saccharomyces_cerevisiae_x_Saccharomyces_eubayanus	Saccharomyces_eubayanus_x_Saccharomyces_uvarum
Alternaria	Alternaria_tenuissima	GCA_004154745.1	Alternaria_alternata	GCA_009932595.1		Saccharomyces_cerevisiae_x_Saccharomyces_eubayanus	Saccharomyces_pastorianus
Alternaria	Alternaria_tenuissima	GCA_004154735.1	Alternaria_arborescens	GCA_000256225.1		Saccharomyces_cerevisiae_x_Saccharomyces_eubayanus	Saccharomyces_sp_boulardii
Alternaria	Alternaria_tenuissima	GCA_004154735.1	Alternaria_arborescens	GCA_004634205.1		Saccharomyces_cerevisiae_x_Saccharomyces_eubayanus_x_Saccharomyces_kudriavzevii_x_Saccharomyces_uvarum	Saccharomyces_cerevisiae
Alternaria	Alternaria_tenuissima	GCA_004154735.1	Alternaria_arborescens	GCA_004154835.1		Saccharomyces_cerevisiae_x_Saccharomyces_eubayanus_x_Saccharomyces_kudriavzevii_x_Saccharomyces_uvarum	Saccharomyces_cerevisiae_x_Saccharomyces_kudriavzevii
Alternaria	Alternaria_tenuissima	GCA_004154735.1	Alternaria_arborescens	GCA_004155955.1		Saccharomyces_cerevisiae_x_Saccharomyces_eubayanus_x_Saccharomyces_kudriavzevii_x_Saccharomyces_uvarum	Saccharomyces_pastorianus
Alternaria	Alternaria_tenuissima	GCA_004154735.1	Alternaria_arborescens	GCA_004154815.1		Saccharomyces_cerevisiae_x_Saccharomyces_kudriavzevii	Saccharomyces_cerevisiae
Alternaria	Alternaria_tenuissima	GCA_004154735.1	Alternaria_alternata	GCA_001642055.1		Saccharomyces_eubayanus	Saccharomyces_cerevisiae_x_Saccharomyces_eubayanus
Alternaria	Alternaria_tenuissima	GCA_004154735.1	Alternaria_alternata	GCA_004634295.1		Saccharomyces_eubayanus	Saccharomyces_cerevisiae_x_Saccharomyces_kudriavzevii
Alternaria	Alternaria_tenuissima	GCA_004154735.1	Alternaria_alternata	GCA_001696825.1		Saccharomyces_eubayanus	Saccharomyces_eubayanus_x_Saccharomyces_uvarum
Alternaria	Alternaria_tenuissima	GCA_004154735.1	Alternaria_alternata	GCA_001572055.1		Saccharomyces_eubayanus	Saccharomyces_pastorianus
Alternaria	Alternaria_tenuissima	GCA_004154735.1	Alternaria_alternata	GCA_004154755.1		Saccharomyces_eubayanus_x_Saccharomyces_uvarum	Saccharomyces_cerevisiae_x_Saccharomyces_eubayanus_x_Saccharomyces_kudriavzevii_x_Saccharomyces_uvarum
Alternaria	Alternaria_tenuissima	GCA_004154735.1	Alternaria_alternata	GCA_001443195.1		Saccharomyces_eubayanus_x_Saccharomyces_uvarum	Saccharomyces_cerevisiae_x_Saccharomyces_kudriavzevii
Alternaria	Alternaria_tenuissima	GCA_004154735.1	Alternaria_alternata	GCA_009650635.1		Saccharomyces_eubayanus_x_Saccharomyces_uvarum	Saccharomyces_pastorianus
Alternaria	Alternaria_tenuissima	GCA_004154735.1	Alternaria_alternata	GCA_009932595.1		Saccharomyces_eubayanus_x_Saccharomyces_uvarum	Saccharomyces_uvarum
Alternaria	Alternaria_tenuissima	GCA_004154845.1	Alternaria_arborescens	GCA_000256225.1		Saccharomyces_kudriavzevii	Saccharomyces_cerevisiae_x_Saccharomyces_eubayanus_x_Saccharomyces_kudriavzevii_x_Saccharomyces_uvarum
Alternaria	Alternaria_tenuissima	GCA_004154845.1	Alternaria_arborescens	GCA_004634205.1		Saccharomyces_kudriavzevii	Saccharomyces_cerevisiae_x_Saccharomyces_kudriavzevii
Alternaria	Alternaria_tenuissima	GCA_004154845.1	Alternaria_arborescens	GCA_004154835.1		Saccharomyces_kudriavzevii	Saccharomyces_pastorianus
Alternaria	Alternaria_tenuissima	GCA_004154845.1	Alternaria_arborescens	GCA_004155955.1		Saccharomyces_pastorianus	Saccharomyces_cerevisiae
Alternaria	Alternaria_tenuissima	GCA_004154845.1	Alternaria_arborescens	GCA_004154815.1		Saccharomyces_pastorianus	Saccharomyces_cerevisiae_x_Saccharomyces_kudriavzevii
Alternaria	Alternaria_tenuissima	GCA_004154845.1	Alternaria_alternata	GCA_001642055.1		Saccharomyces_sp_boulardii	Saccharomyces_cerevisiae
Alternaria	Alternaria_tenuissima	GCA_004154845.1	Alternaria_alternata	GCA_004634295.1		Saccharomyces_sp_boulardii	Saccharomyces_cerevisiae_x_Saccharomyces_eubayanus_x_Saccharomyces_kudriavzevii_x_Saccharomyces_uvarum
Alternaria	Alternaria_tenuissima	GCA_004154845.1	Alternaria_alternata	GCA_001696825.1		Saccharomyces_sp_boulardii	Saccharomyces_cerevisiae_x_Saccharomyces_kudriavzevii
Alternaria	Alternaria_tenuissima	GCA_004154845.1	Alternaria_alternata	GCA_001572055.1		Saccharomyces_sp_boulardii	Saccharomyces_pastorianus
Alternaria	Alternaria_tenuissima	GCA_004154845.1	Alternaria_alternata	GCA_004154755.1		Saccharomyces_uvarum	Saccharomyces_cerevisiae_x_Saccharomyces_eubayanus_x_Saccharomyces_kudriavzevii_x_Saccharomyces_uvarum
Alternaria	Alternaria_tenuissima	GCA_004154845.1	Alternaria_alternata	GCA_001443195.1		Trichophyton_interdigitale	Trichophyton_mentagrophytes
Alternaria	Alternaria_tenuissima	GCA_004154845.1	Alternaria_alternata	GCA_009650635.1
Alternaria	Alternaria_tenuissima	GCA_004154845.1	Alternaria_alternata	GCA_009932595.1
Alternaria	Alternaria_tenuissima	GCA_004156035.1	Alternaria_arborescens	GCA_000256225.1
Alternaria	Alternaria_tenuissima	GCA_004156035.1	Alternaria_arborescens	GCA_004634205.1
Alternaria	Alternaria_tenuissima	GCA_004156035.1	Alternaria_arborescens	GCA_004154835.1
Alternaria	Alternaria_tenuissima	GCA_004156035.1	Alternaria_arborescens	GCA_004155955.1
Alternaria	Alternaria_tenuissima	GCA_004156035.1	Alternaria_arborescens	GCA_004154815.1
Alternaria	Alternaria_tenuissima	GCA_004156035.1	Alternaria_alternata	GCA_001642055.1
Alternaria	Alternaria_tenuissima	GCA_004156035.1	Alternaria_alternata	GCA_004634295.1
Alternaria	Alternaria_tenuissima	GCA_004156035.1	Alternaria_alternata	GCA_001696825.1
Alternaria	Alternaria_tenuissima	GCA_004156035.1	Alternaria_alternata	GCA_001572055.1
Alternaria	Alternaria_tenuissima	GCA_004156035.1	Alternaria_alternata	GCA_004154755.1
Alternaria	Alternaria_tenuissima	GCA_004156035.1	Alternaria_alternata	GCA_001443195.1
Alternaria	Alternaria_tenuissima	GCA_004156035.1	Alternaria_alternata	GCA_009650635.1
Alternaria	Alternaria_tenuissima	GCA_004156035.1	Alternaria_alternata	GCA_009932595.1
Alternaria	Alternaria_tenuissima	GCA_004154765.1	Alternaria_arborescens	GCA_000256225.1
Alternaria	Alternaria_tenuissima	GCA_004154765.1	Alternaria_arborescens	GCA_004634205.1
Alternaria	Alternaria_tenuissima	GCA_004154765.1	Alternaria_arborescens	GCA_004154835.1
Alternaria	Alternaria_tenuissima	GCA_004154765.1	Alternaria_arborescens	GCA_004155955.1
Alternaria	Alternaria_tenuissima	GCA_004154765.1	Alternaria_arborescens	GCA_004154815.1
Alternaria	Alternaria_tenuissima	GCA_004154765.1	Alternaria_alternata	GCA_001642055.1
Alternaria	Alternaria_tenuissima	GCA_004154765.1	Alternaria_alternata	GCA_004634295.1
Alternaria	Alternaria_tenuissima	GCA_004154765.1	Alternaria_alternata	GCA_001696825.1
Alternaria	Alternaria_tenuissima	GCA_004154765.1	Alternaria_alternata	GCA_001572055.1
Alternaria	Alternaria_tenuissima	GCA_004154765.1	Alternaria_alternata	GCA_004154755.1
Alternaria	Alternaria_tenuissima	GCA_004154765.1	Alternaria_alternata	GCA_001443195.1
Alternaria	Alternaria_tenuissima	GCA_004154765.1	Alternaria_alternata	GCA_009650635.1
Alternaria	Alternaria_tenuissima	GCA_004154765.1	Alternaria_alternata	GCA_009932595.1
Alternaria	Alternaria_arborescens	GCA_000256225.1	Alternaria_alternata	GCA_001642055.1
Alternaria	Alternaria_arborescens	GCA_000256225.1	Alternaria_alternata	GCA_004634295.1
Alternaria	Alternaria_arborescens	GCA_000256225.1	Alternaria_alternata	GCA_001696825.1
Alternaria	Alternaria_arborescens	GCA_000256225.1	Alternaria_alternata	GCA_001572055.1
Alternaria	Alternaria_arborescens	GCA_000256225.1	Alternaria_alternata	GCA_004154755.1
Alternaria	Alternaria_arborescens	GCA_000256225.1	Alternaria_alternata	GCA_001443195.1
Alternaria	Alternaria_arborescens	GCA_000256225.1	Alternaria_alternata	GCA_009650635.1
Alternaria	Alternaria_arborescens	GCA_000256225.1	Alternaria_alternata	GCA_009932595.1
Alternaria	Alternaria_arborescens	GCA_004634205.1	Alternaria_alternata	GCA_001642055.1
Alternaria	Alternaria_arborescens	GCA_004634205.1	Alternaria_alternata	GCA_004634295.1
Alternaria	Alternaria_arborescens	GCA_004634205.1	Alternaria_alternata	GCA_001696825.1
Alternaria	Alternaria_arborescens	GCA_004634205.1	Alternaria_alternata	GCA_001572055.1
Alternaria	Alternaria_arborescens	GCA_004634205.1	Alternaria_alternata	GCA_004154755.1
Alternaria	Alternaria_arborescens	GCA_004634205.1	Alternaria_alternata	GCA_001443195.1
Alternaria	Alternaria_arborescens	GCA_004634205.1	Alternaria_alternata	GCA_009650635.1
Alternaria	Alternaria_arborescens	GCA_004634205.1	Alternaria_alternata	GCA_009932595.1
Alternaria	Alternaria_arborescens	GCA_004154835.1	Alternaria_alternata	GCA_001642055.1
Alternaria	Alternaria_arborescens	GCA_004154835.1	Alternaria_alternata	GCA_004634295.1
Alternaria	Alternaria_arborescens	GCA_004154835.1	Alternaria_alternata	GCA_001696825.1
Alternaria	Alternaria_arborescens	GCA_004154835.1	Alternaria_alternata	GCA_001572055.1
Alternaria	Alternaria_arborescens	GCA_004154835.1	Alternaria_alternata	GCA_004154755.1
Alternaria	Alternaria_arborescens	GCA_004154835.1	Alternaria_alternata	GCA_001443195.1
Alternaria	Alternaria_arborescens	GCA_004154835.1	Alternaria_alternata	GCA_009650635.1
Alternaria	Alternaria_arborescens	GCA_004154835.1	Alternaria_alternata	GCA_009932595.1
Alternaria	Alternaria_arborescens	GCA_004155955.1	Alternaria_alternata	GCA_001642055.1
Alternaria	Alternaria_arborescens	GCA_004155955.1	Alternaria_alternata	GCA_004634295.1
Alternaria	Alternaria_arborescens	GCA_004155955.1	Alternaria_alternata	GCA_001696825.1
Alternaria	Alternaria_arborescens	GCA_004155955.1	Alternaria_alternata	GCA_001572055.1
Alternaria	Alternaria_arborescens	GCA_004155955.1	Alternaria_alternata	GCA_004154755.1
Alternaria	Alternaria_arborescens	GCA_004155955.1	Alternaria_alternata	GCA_001443195.1
Alternaria	Alternaria_arborescens	GCA_004155955.1	Alternaria_alternata	GCA_009650635.1
Alternaria	Alternaria_arborescens	GCA_004155955.1	Alternaria_alternata	GCA_009932595.1
Alternaria	Alternaria_arborescens	GCA_004154815.1	Alternaria_alternata	GCA_001642055.1
Alternaria	Alternaria_arborescens	GCA_004154815.1	Alternaria_alternata	GCA_004634295.1
Alternaria	Alternaria_arborescens	GCA_004154815.1	Alternaria_alternata	GCA_001696825.1
Alternaria	Alternaria_arborescens	GCA_004154815.1	Alternaria_alternata	GCA_001572055.1
Alternaria	Alternaria_arborescens	GCA_004154815.1	Alternaria_alternata	GCA_004154755.1
Alternaria	Alternaria_arborescens	GCA_004154815.1	Alternaria_alternata	GCA_001443195.1
Alternaria	Alternaria_arborescens	GCA_004154815.1	Alternaria_alternata	GCA_009650635.1
Alternaria	Alternaria_arborescens	GCA_004154815.1	Alternaria_alternata	GCA_009932595.1
Aspergillus	Aspergillus_sojae	GCA_009687785.1	Aspergillus_flavus	GCA_001576655.1
Aspergillus	Aspergillus_sojae	GCA_009687785.1	Aspergillus_flavus	GCA_003967675.1
Aspergillus	Aspergillus_sojae	GCA_009687785.1	Aspergillus_flavus	GCA_002456175.2
Aspergillus	Aspergillus_sojae	GCA_009687785.1	Aspergillus_flavus	GCA_009017415.1
Aspergillus	Aspergillus_sojae	GCA_009687785.1	Aspergillus_flavus	GCA_003711345.1
Aspergillus	Aspergillus_sojae	GCA_009687785.1	Aspergillus_oryzae	GCA_009687685.1
Aspergillus	Aspergillus_sojae	GCA_009687785.1	Aspergillus_oryzae	GCA_009687125.1
Aspergillus	Aspergillus_sojae	GCA_009687785.1	Aspergillus_oryzae	GCA_009687365.1
Aspergillus	Aspergillus_sojae	GCA_009687785.1	Aspergillus_oryzae	GCA_009685095.1
Aspergillus	Aspergillus_sojae	GCA_009687785.1	Aspergillus_oryzae	GCA_009686585.1
Aspergillus	Aspergillus_sojae	GCA_009687785.1	Aspergillus_oryzae	GCA_009687525.1
Aspergillus	Aspergillus_sojae	GCA_009687785.1	Aspergillus_oryzae	GCA_009686465.1
Aspergillus	Aspergillus_sojae	GCA_009687785.1	Aspergillus_oryzae	GCA_009686945.1
Aspergillus	Aspergillus_sojae	GCA_009687785.1	Aspergillus_oryzae	GCA_009686825.1
Aspergillus	Aspergillus_sojae	GCA_009687785.1	Aspergillus_parasiticus	GCA_001576805.1
Aspergillus	Aspergillus_sojae	GCA_009687785.1	Aspergillus_parasiticus	GCA_000956085.1
Aspergillus	Aspergillus_sojae	GCA_009687785.1	Aspergillus_parasiticus	GCA_009176385.1
Aspergillus	Aspergillus_sojae	GCA_009687785.1	Aspergillus_parasiticus	GCA_000731695.1
Aspergillus	Aspergillus_sojae	GCA_009687805.1	Aspergillus_flavus	GCA_001576655.1
Aspergillus	Aspergillus_sojae	GCA_009687805.1	Aspergillus_flavus	GCA_003967675.1
Aspergillus	Aspergillus_sojae	GCA_009687805.1	Aspergillus_flavus	GCA_002456175.2
Aspergillus	Aspergillus_sojae	GCA_009687805.1	Aspergillus_flavus	GCA_009017415.1
Aspergillus	Aspergillus_sojae	GCA_009687805.1	Aspergillus_flavus	GCA_003711345.1
Aspergillus	Aspergillus_sojae	GCA_009687805.1	Aspergillus_oryzae	GCA_009687685.1
Aspergillus	Aspergillus_sojae	GCA_009687805.1	Aspergillus_oryzae	GCA_009687125.1
Aspergillus	Aspergillus_sojae	GCA_009687805.1	Aspergillus_oryzae	GCA_009687365.1
Aspergillus	Aspergillus_sojae	GCA_009687805.1	Aspergillus_oryzae	GCA_009685095.1
Aspergillus	Aspergillus_sojae	GCA_009687805.1	Aspergillus_oryzae	GCA_009686585.1
Aspergillus	Aspergillus_sojae	GCA_009687805.1	Aspergillus_oryzae	GCA_009687525.1
Aspergillus	Aspergillus_sojae	GCA_009687805.1	Aspergillus_oryzae	GCA_009686465.1
Aspergillus	Aspergillus_sojae	GCA_009687805.1	Aspergillus_oryzae	GCA_009686945.1
Aspergillus	Aspergillus_sojae	GCA_009687805.1	Aspergillus_oryzae	GCA_009686825.1
Aspergillus	Aspergillus_sojae	GCA_009687805.1	Aspergillus_parasiticus	GCA_001576805.1
Aspergillus	Aspergillus_sojae	GCA_009687805.1	Aspergillus_parasiticus	GCA_000956085.1
Aspergillus	Aspergillus_sojae	GCA_009687805.1	Aspergillus_parasiticus	GCA_009176385.1
Aspergillus	Aspergillus_sojae	GCA_009687805.1	Aspergillus_parasiticus	GCA_000731695.1
Aspergillus	Aspergillus_sojae	GCA_009687765.1	Aspergillus_flavus	GCA_001576655.1
Aspergillus	Aspergillus_sojae	GCA_009687765.1	Aspergillus_flavus	GCA_003967675.1
Aspergillus	Aspergillus_sojae	GCA_009687765.1	Aspergillus_flavus	GCA_002456175.2
Aspergillus	Aspergillus_sojae	GCA_009687765.1	Aspergillus_flavus	GCA_009017415.1
Aspergillus	Aspergillus_sojae	GCA_009687765.1	Aspergillus_flavus	GCA_003711345.1
Aspergillus	Aspergillus_sojae	GCA_009687765.1	Aspergillus_oryzae	GCA_009687685.1
Aspergillus	Aspergillus_sojae	GCA_009687765.1	Aspergillus_oryzae	GCA_009687125.1
Aspergillus	Aspergillus_sojae	GCA_009687765.1	Aspergillus_oryzae	GCA_009687365.1
Aspergillus	Aspergillus_sojae	GCA_009687765.1	Aspergillus_oryzae	GCA_009685095.1
Aspergillus	Aspergillus_sojae	GCA_009687765.1	Aspergillus_oryzae	GCA_009686585.1
Aspergillus	Aspergillus_sojae	GCA_009687765.1	Aspergillus_oryzae	GCA_009687525.1
Aspergillus	Aspergillus_sojae	GCA_009687765.1	Aspergillus_oryzae	GCA_009686465.1
Aspergillus	Aspergillus_sojae	GCA_009687765.1	Aspergillus_oryzae	GCA_009686945.1
Aspergillus	Aspergillus_sojae	GCA_009687765.1	Aspergillus_oryzae	GCA_009686825.1
Aspergillus	Aspergillus_sojae	GCA_009687765.1	Aspergillus_parasiticus	GCA_001576805.1
Aspergillus	Aspergillus_sojae	GCA_009687765.1	Aspergillus_parasiticus	GCA_000956085.1
Aspergillus	Aspergillus_sojae	GCA_009687765.1	Aspergillus_parasiticus	GCA_009176385.1
Aspergillus	Aspergillus_sojae	GCA_009687765.1	Aspergillus_parasiticus	GCA_000731695.1
Aspergillus	Aspergillus_sojae	GCA_000226655.1	Aspergillus_flavus	GCA_001576655.1
Aspergillus	Aspergillus_sojae	GCA_000226655.1	Aspergillus_flavus	GCA_003967675.1
Aspergillus	Aspergillus_sojae	GCA_000226655.1	Aspergillus_flavus	GCA_002456175.2
Aspergillus	Aspergillus_sojae	GCA_000226655.1	Aspergillus_flavus	GCA_009017415.1
Aspergillus	Aspergillus_sojae	GCA_000226655.1	Aspergillus_flavus	GCA_003953735.1
Aspergillus	Aspergillus_sojae	GCA_000226655.1	Aspergillus_flavus	GCA_003711345.1
Aspergillus	Aspergillus_sojae	GCA_000226655.1	Aspergillus_oryzae	GCA_009687125.1
Aspergillus	Aspergillus_sojae	GCA_000226655.1	Aspergillus_oryzae	GCA_000269785.2
Aspergillus	Aspergillus_sojae	GCA_000226655.1	Aspergillus_oryzae	GCA_009685095.1
Aspergillus	Aspergillus_sojae	GCA_000226655.1	Aspergillus_oryzae	GCA_009686585.1
Aspergillus	Aspergillus_sojae	GCA_000226655.1	Aspergillus_oryzae	GCA_009687525.1
Aspergillus	Aspergillus_sojae	GCA_000226655.1	Aspergillus_oryzae	GCA_009686945.1
Aspergillus	Aspergillus_sojae	GCA_000226655.1	Aspergillus_parasiticus	GCA_001576805.1
Aspergillus	Aspergillus_sojae	GCA_000226655.1	Aspergillus_parasiticus	GCA_000956085.1
Aspergillus	Aspergillus_sojae	GCA_000226655.1	Aspergillus_parasiticus	GCA_009176385.1
Aspergillus	Aspergillus_sojae	GCA_000226655.1	Aspergillus_parasiticus	GCA_000731695.1
Aspergillus	Aspergillus_sojae	GCA_008274985.1	Aspergillus_flavus	GCA_001576655.1
Aspergillus	Aspergillus_sojae	GCA_008274985.1	Aspergillus_flavus	GCA_003967675.1
Aspergillus	Aspergillus_sojae	GCA_008274985.1	Aspergillus_flavus	GCA_002456175.2
Aspergillus	Aspergillus_sojae	GCA_008274985.1	Aspergillus_flavus	GCA_009017415.1
Aspergillus	Aspergillus_sojae	GCA_008274985.1	Aspergillus_flavus	GCA_003711345.1
Aspergillus	Aspergillus_sojae	GCA_008274985.1	Aspergillus_oryzae	GCA_009687685.1
Aspergillus	Aspergillus_sojae	GCA_008274985.1	Aspergillus_oryzae	GCA_009687125.1
Aspergillus	Aspergillus_sojae	GCA_008274985.1	Aspergillus_oryzae	GCA_009687365.1
Aspergillus	Aspergillus_sojae	GCA_008274985.1	Aspergillus_oryzae	GCA_009685095.1
Aspergillus	Aspergillus_sojae	GCA_008274985.1	Aspergillus_oryzae	GCA_009686585.1
Aspergillus	Aspergillus_sojae	GCA_008274985.1	Aspergillus_oryzae	GCA_009687525.1
Aspergillus	Aspergillus_sojae	GCA_008274985.1	Aspergillus_oryzae	GCA_009686465.1
Aspergillus	Aspergillus_sojae	GCA_008274985.1	Aspergillus_oryzae	GCA_009686945.1
Aspergillus	Aspergillus_sojae	GCA_008274985.1	Aspergillus_oryzae	GCA_009686825.1
Aspergillus	Aspergillus_sojae	GCA_008274985.1	Aspergillus_parasiticus	GCA_001576805.1
Aspergillus	Aspergillus_sojae	GCA_008274985.1	Aspergillus_parasiticus	GCA_000956085.1
Aspergillus	Aspergillus_sojae	GCA_008274985.1	Aspergillus_parasiticus	GCA_009176385.1
Aspergillus	Aspergillus_sojae	GCA_008274985.1	Aspergillus_parasiticus	GCA_000731695.1
Aspergillus	Aspergillus_flavus	GCA_004329145.1	Aspergillus_oryzae	GCA_009687685.1
Aspergillus	Aspergillus_flavus	GCA_004329145.1	Aspergillus_oryzae	GCA_009687125.1
Aspergillus	Aspergillus_flavus	GCA_004329145.1	Aspergillus_oryzae	GCA_000269785.2
Aspergillus	Aspergillus_flavus	GCA_004329145.1	Aspergillus_oryzae	GCA_009687365.1
Aspergillus	Aspergillus_flavus	GCA_004329145.1	Aspergillus_oryzae	GCA_009685095.1
Aspergillus	Aspergillus_flavus	GCA_004329145.1	Aspergillus_oryzae	GCA_009686585.1
Aspergillus	Aspergillus_flavus	GCA_004329145.1	Aspergillus_oryzae	GCA_009687525.1
Aspergillus	Aspergillus_flavus	GCA_004329145.1	Aspergillus_oryzae	GCA_009686465.1
Aspergillus	Aspergillus_flavus	GCA_004329145.1	Aspergillus_oryzae	GCA_009686945.1
Aspergillus	Aspergillus_flavus	GCA_004329145.1	Aspergillus_oryzae	GCA_009686825.1
Aspergillus	Aspergillus_flavus	GCA_004329145.1	Aspergillus_parasiticus	GCA_009176385.1
Aspergillus	Aspergillus_flavus	GCA_002217635.1	Aspergillus_oryzae	GCA_009687685.1
Aspergillus	Aspergillus_flavus	GCA_002217635.1	Aspergillus_oryzae	GCA_009687125.1
Aspergillus	Aspergillus_flavus	GCA_002217635.1	Aspergillus_oryzae	GCA_000269785.2
Aspergillus	Aspergillus_flavus	GCA_002217635.1	Aspergillus_oryzae	GCA_009687365.1
Aspergillus	Aspergillus_flavus	GCA_002217635.1	Aspergillus_oryzae	GCA_009685095.1
Aspergillus	Aspergillus_flavus	GCA_002217635.1	Aspergillus_oryzae	GCA_009686585.1
Aspergillus	Aspergillus_flavus	GCA_002217635.1	Aspergillus_oryzae	GCA_009687525.1
Aspergillus	Aspergillus_flavus	GCA_002217635.1	Aspergillus_oryzae	GCA_009686465.1
Aspergillus	Aspergillus_flavus	GCA_002217635.1	Aspergillus_oryzae	GCA_009686945.1
Aspergillus	Aspergillus_flavus	GCA_002217635.1	Aspergillus_oryzae	GCA_009686825.1
Aspergillus	Aspergillus_flavus	GCA_002217635.1	Aspergillus_parasiticus	GCA_009176385.1
Aspergillus	Aspergillus_flavus	GCA_001576655.1	Aspergillus_oryzae	GCA_009687685.1
Aspergillus	Aspergillus_flavus	GCA_001576655.1	Aspergillus_oryzae	GCA_009687125.1
Aspergillus	Aspergillus_flavus	GCA_001576655.1	Aspergillus_oryzae	GCA_000269785.2
Aspergillus	Aspergillus_flavus	GCA_001576655.1	Aspergillus_oryzae	GCA_009687365.1
Aspergillus	Aspergillus_flavus	GCA_001576655.1	Aspergillus_oryzae	GCA_009685095.1
Aspergillus	Aspergillus_flavus	GCA_001576655.1	Aspergillus_oryzae	GCA_009686585.1
Aspergillus	Aspergillus_flavus	GCA_001576655.1	Aspergillus_oryzae	GCA_009687525.1
Aspergillus	Aspergillus_flavus	GCA_001576655.1	Aspergillus_oryzae	GCA_009686465.1
Aspergillus	Aspergillus_flavus	GCA_001576655.1	Aspergillus_oryzae	GCA_009686945.1
Aspergillus	Aspergillus_flavus	GCA_001576655.1	Aspergillus_oryzae	GCA_009686825.1
Aspergillus	Aspergillus_flavus	GCA_001576655.1	Aspergillus_parasiticus	GCA_000956085.1
Aspergillus	Aspergillus_flavus	GCA_001576655.1	Aspergillus_parasiticus	GCA_009176385.1
Aspergillus	Aspergillus_flavus	GCA_001576655.1	Aspergillus_parasiticus	GCA_000731695.1
Aspergillus	Aspergillus_flavus	GCA_003967675.1	Aspergillus_oryzae	GCA_009687685.1
Aspergillus	Aspergillus_flavus	GCA_003967675.1	Aspergillus_oryzae	GCA_009687125.1
Aspergillus	Aspergillus_flavus	GCA_003967675.1	Aspergillus_oryzae	GCA_000269785.2
Aspergillus	Aspergillus_flavus	GCA_003967675.1	Aspergillus_oryzae	GCA_009687365.1
Aspergillus	Aspergillus_flavus	GCA_003967675.1	Aspergillus_oryzae	GCA_009685095.1
Aspergillus	Aspergillus_flavus	GCA_003967675.1	Aspergillus_oryzae	GCA_009686585.1
Aspergillus	Aspergillus_flavus	GCA_003967675.1	Aspergillus_oryzae	GCA_009687525.1
Aspergillus	Aspergillus_flavus	GCA_003967675.1	Aspergillus_oryzae	GCA_009686465.1
Aspergillus	Aspergillus_flavus	GCA_003967675.1	Aspergillus_oryzae	GCA_009686945.1
Aspergillus	Aspergillus_flavus	GCA_003967675.1	Aspergillus_oryzae	GCA_009686825.1
Aspergillus	Aspergillus_flavus	GCA_003967675.1	Aspergillus_parasiticus	GCA_000956085.1
Aspergillus	Aspergillus_flavus	GCA_003967675.1	Aspergillus_parasiticus	GCA_009176385.1
Aspergillus	Aspergillus_flavus	GCA_003967675.1	Aspergillus_parasiticus	GCA_000731695.1
Aspergillus	Aspergillus_flavus	GCA_003953515.1	Aspergillus_oryzae	GCA_009687685.1
Aspergillus	Aspergillus_flavus	GCA_003953515.1	Aspergillus_oryzae	GCA_009687125.1
Aspergillus	Aspergillus_flavus	GCA_003953515.1	Aspergillus_oryzae	GCA_000269785.2
Aspergillus	Aspergillus_flavus	GCA_003953515.1	Aspergillus_oryzae	GCA_009687365.1
Aspergillus	Aspergillus_flavus	GCA_003953515.1	Aspergillus_oryzae	GCA_009685095.1
Aspergillus	Aspergillus_flavus	GCA_003953515.1	Aspergillus_oryzae	GCA_009686585.1
Aspergillus	Aspergillus_flavus	GCA_003953515.1	Aspergillus_oryzae	GCA_009687525.1
Aspergillus	Aspergillus_flavus	GCA_003953515.1	Aspergillus_oryzae	GCA_009686465.1
Aspergillus	Aspergillus_flavus	GCA_003953515.1	Aspergillus_oryzae	GCA_009686945.1
Aspergillus	Aspergillus_flavus	GCA_003953515.1	Aspergillus_oryzae	GCA_009686825.1
Aspergillus	Aspergillus_flavus	GCA_003953515.1	Aspergillus_parasiticus	GCA_009176385.1
Aspergillus	Aspergillus_flavus	GCA_002456175.2	Aspergillus_oryzae	GCA_009687685.1
Aspergillus	Aspergillus_flavus	GCA_002456175.2	Aspergillus_oryzae	GCA_009687125.1
Aspergillus	Aspergillus_flavus	GCA_002456175.2	Aspergillus_oryzae	GCA_000269785.2
Aspergillus	Aspergillus_flavus	GCA_002456175.2	Aspergillus_oryzae	GCA_009687365.1
Aspergillus	Aspergillus_flavus	GCA_002456175.2	Aspergillus_oryzae	GCA_009685095.1
Aspergillus	Aspergillus_flavus	GCA_002456175.2	Aspergillus_oryzae	GCA_009686585.1
Aspergillus	Aspergillus_flavus	GCA_002456175.2	Aspergillus_oryzae	GCA_009687525.1
Aspergillus	Aspergillus_flavus	GCA_002456175.2	Aspergillus_oryzae	GCA_009686465.1
Aspergillus	Aspergillus_flavus	GCA_002456175.2	Aspergillus_oryzae	GCA_009686945.1
Aspergillus	Aspergillus_flavus	GCA_002456175.2	Aspergillus_oryzae	GCA_009686825.1
Aspergillus	Aspergillus_flavus	GCA_002456175.2	Aspergillus_parasiticus	GCA_000956085.1
Aspergillus	Aspergillus_flavus	GCA_002456175.2	Aspergillus_parasiticus	GCA_009176385.1
Aspergillus	Aspergillus_flavus	GCA_002456175.2	Aspergillus_parasiticus	GCA_000731695.1
Aspergillus	Aspergillus_flavus	GCA_002443195.2	Aspergillus_oryzae	GCA_009687685.1
Aspergillus	Aspergillus_flavus	GCA_002443195.2	Aspergillus_oryzae	GCA_009687125.1
Aspergillus	Aspergillus_flavus	GCA_002443195.2	Aspergillus_oryzae	GCA_000269785.2
Aspergillus	Aspergillus_flavus	GCA_002443195.2	Aspergillus_oryzae	GCA_009687365.1
Aspergillus	Aspergillus_flavus	GCA_002443195.2	Aspergillus_oryzae	GCA_009685095.1
Aspergillus	Aspergillus_flavus	GCA_002443195.2	Aspergillus_oryzae	GCA_009686585.1
Aspergillus	Aspergillus_flavus	GCA_002443195.2	Aspergillus_oryzae	GCA_009687525.1
Aspergillus	Aspergillus_flavus	GCA_002443195.2	Aspergillus_oryzae	GCA_009686465.1
Aspergillus	Aspergillus_flavus	GCA_002443195.2	Aspergillus_oryzae	GCA_009686945.1
Aspergillus	Aspergillus_flavus	GCA_002443195.2	Aspergillus_oryzae	GCA_009686825.1
Aspergillus	Aspergillus_flavus	GCA_002443195.2	Aspergillus_parasiticus	GCA_009176385.1
Aspergillus	Aspergillus_flavus	GCA_009017415.1	Aspergillus_oryzae	GCA_009687685.1
Aspergillus	Aspergillus_flavus	GCA_009017415.1	Aspergillus_oryzae	GCA_009687125.1
Aspergillus	Aspergillus_flavus	GCA_009017415.1	Aspergillus_oryzae	GCA_000269785.2
Aspergillus	Aspergillus_flavus	GCA_009017415.1	Aspergillus_oryzae	GCA_009687365.1
Aspergillus	Aspergillus_flavus	GCA_009017415.1	Aspergillus_oryzae	GCA_009685095.1
Aspergillus	Aspergillus_flavus	GCA_009017415.1	Aspergillus_oryzae	GCA_009686585.1
Aspergillus	Aspergillus_flavus	GCA_009017415.1	Aspergillus_oryzae	GCA_009687525.1
Aspergillus	Aspergillus_flavus	GCA_009017415.1	Aspergillus_oryzae	GCA_009686465.1
Aspergillus	Aspergillus_flavus	GCA_009017415.1	Aspergillus_oryzae	GCA_009686945.1
Aspergillus	Aspergillus_flavus	GCA_009017415.1	Aspergillus_oryzae	GCA_009686825.1
Aspergillus	Aspergillus_flavus	GCA_009017415.1	Aspergillus_parasiticus	GCA_000956085.1
Aspergillus	Aspergillus_flavus	GCA_009017415.1	Aspergillus_parasiticus	GCA_009176385.1
Aspergillus	Aspergillus_flavus	GCA_003953735.1	Aspergillus_oryzae	GCA_009687685.1
Aspergillus	Aspergillus_flavus	GCA_003953735.1	Aspergillus_oryzae	GCA_009687125.1
Aspergillus	Aspergillus_flavus	GCA_003953735.1	Aspergillus_oryzae	GCA_000269785.2
Aspergillus	Aspergillus_flavus	GCA_003953735.1	Aspergillus_oryzae	GCA_009687365.1
Aspergillus	Aspergillus_flavus	GCA_003953735.1	Aspergillus_oryzae	GCA_009685095.1
Aspergillus	Aspergillus_flavus	GCA_003953735.1	Aspergillus_oryzae	GCA_009686585.1
Aspergillus	Aspergillus_flavus	GCA_003953735.1	Aspergillus_oryzae	GCA_009687525.1
Aspergillus	Aspergillus_flavus	GCA_003953735.1	Aspergillus_oryzae	GCA_009686465.1
Aspergillus	Aspergillus_flavus	GCA_003953735.1	Aspergillus_oryzae	GCA_009686945.1
Aspergillus	Aspergillus_flavus	GCA_003953735.1	Aspergillus_oryzae	GCA_009686825.1
Aspergillus	Aspergillus_flavus	GCA_003953735.1	Aspergillus_parasiticus	GCA_000956085.1
Aspergillus	Aspergillus_flavus	GCA_003953735.1	Aspergillus_parasiticus	GCA_009176385.1
Aspergillus	Aspergillus_flavus	GCA_003711345.1	Aspergillus_oryzae	GCA_009687685.1
Aspergillus	Aspergillus_flavus	GCA_003711345.1	Aspergillus_oryzae	GCA_009687125.1
Aspergillus	Aspergillus_flavus	GCA_003711345.1	Aspergillus_oryzae	GCA_000269785.2
Aspergillus	Aspergillus_flavus	GCA_003711345.1	Aspergillus_oryzae	GCA_009687365.1
Aspergillus	Aspergillus_flavus	GCA_003711345.1	Aspergillus_oryzae	GCA_009685095.1
Aspergillus	Aspergillus_flavus	GCA_003711345.1	Aspergillus_oryzae	GCA_009686585.1
Aspergillus	Aspergillus_flavus	GCA_003711345.1	Aspergillus_oryzae	GCA_009687525.1
Aspergillus	Aspergillus_flavus	GCA_003711345.1	Aspergillus_oryzae	GCA_009686465.1
Aspergillus	Aspergillus_flavus	GCA_003711345.1	Aspergillus_oryzae	GCA_009686945.1
Aspergillus	Aspergillus_flavus	GCA_003711345.1	Aspergillus_oryzae	GCA_009686825.1
Aspergillus	Aspergillus_flavus	GCA_003711345.1	Aspergillus_parasiticus	GCA_009176385.1
Aspergillus	Aspergillus_oryzae	GCA_009687685.1	Aspergillus_parasiticus	GCA_009176385.1
Aspergillus	Aspergillus_oryzae	GCA_009687125.1	Aspergillus_parasiticus	GCA_009176385.1
Aspergillus	Aspergillus_oryzae	GCA_000269785.2	Aspergillus_parasiticus	GCA_000956085.1
Aspergillus	Aspergillus_oryzae	GCA_000269785.2	Aspergillus_parasiticus	GCA_009176385.1
Aspergillus	Aspergillus_oryzae	GCA_000269785.2	Aspergillus_parasiticus	GCA_000731695.1
Aspergillus	Aspergillus_oryzae	GCA_009687365.1	Aspergillus_parasiticus	GCA_009176385.1
Aspergillus	Aspergillus_oryzae	GCA_009685095.1	Aspergillus_parasiticus	GCA_009176385.1
Aspergillus	Aspergillus_oryzae	GCA_009686585.1	Aspergillus_parasiticus	GCA_009176385.1
Aspergillus	Aspergillus_oryzae	GCA_009686465.1	Aspergillus_parasiticus	GCA_009176385.1
Aspergillus	Aspergillus_oryzae	GCA_009686825.1	Aspergillus_parasiticus	GCA_009176385.1
Blastomyces	Blastomyces_percursus	GCA_003206295.1	Blastomyces_sp_MA2018	GCA_003206215.1
Blastomyces	Blastomyces_percursus	GCA_003206805.1	Blastomyces_sp_MA2018	GCA_003206215.1
Blastomyces	Blastomyces_percursus	GCA_003417775.1	Blastomyces_sp_MA2018	GCA_003206215.1
Blastomyces	Blastomyces_percursus	GCA_001883805.1	Blastomyces_sp_MA2018	GCA_003206215.1
Blastomyces	Blastomyces_percursus	GCA_003206765.1	Blastomyces_sp_MA2018	GCA_003206215.1
Blastomyces	Blastomyces_percursus	GCA_003206875.1	Blastomyces_sp_MA2018	GCA_003206215.1
Blastomyces	Blastomyces_percursus	GCA_003206225.1	Blastomyces_sp_MA2018	GCA_003206215.1
Blastomyces	Blastomyces_percursus	GCA_003206275.1	Blastomyces_sp_MA2018	GCA_003206215.1
Blastomyces	Blastomyces_percursus	GCA_003206885.1	Blastomyces_sp_MA2018	GCA_003206215.1
Blastomyces	Blastomyces_percursus	GCA_003206785.1	Blastomyces_sp_MA2018	GCA_003206215.1
Calonectria	Calonectria_henricotiae	GCA_004380965.1	Calonectria_pseudonaviculata	GCA_004382225.1
Calonectria	Calonectria_henricotiae	GCA_004380965.1	Calonectria_pseudonaviculata	GCA_004380985.1
Calonectria	Calonectria_henricotiae	GCA_004380965.1	Calonectria_pseudonaviculata	GCA_004381035.1
Calonectria	Calonectria_henricotiae	GCA_004380965.1	Calonectria_pseudonaviculata	GCA_004382245.1
Calonectria	Calonectria_henricotiae	GCA_004380965.1	Calonectria_pseudonaviculata	GCA_004141935.1
Calonectria	Calonectria_henricotiae	GCA_004380965.1	Calonectria_pseudonaviculata	GCA_004381005.1
Calonectria	Calonectria_henricotiae	GCA_004380965.1	Calonectria_pseudonaviculata	GCA_004380915.1
Calonectria	Calonectria_henricotiae	GCA_004380965.1	Calonectria_pseudonaviculata	GCA_006505905.1
Calonectria	Calonectria_henricotiae	GCA_004380965.1	Calonectria_pseudonaviculata	GCA_001696505.1
Calonectria	Calonectria_henricotiae	GCA_004382205.1	Calonectria_pseudonaviculata	GCA_004382225.1
Calonectria	Calonectria_henricotiae	GCA_004382205.1	Calonectria_pseudonaviculata	GCA_004380985.1
Calonectria	Calonectria_henricotiae	GCA_004382205.1	Calonectria_pseudonaviculata	GCA_004381035.1
Calonectria	Calonectria_henricotiae	GCA_004382205.1	Calonectria_pseudonaviculata	GCA_004382245.1
Calonectria	Calonectria_henricotiae	GCA_004382205.1	Calonectria_pseudonaviculata	GCA_004141935.1
Calonectria	Calonectria_henricotiae	GCA_004382205.1	Calonectria_pseudonaviculata	GCA_004381005.1
Calonectria	Calonectria_henricotiae	GCA_004382205.1	Calonectria_pseudonaviculata	GCA_004380915.1
Calonectria	Calonectria_henricotiae	GCA_004382205.1	Calonectria_pseudonaviculata	GCA_006505905.1
Calonectria	Calonectria_henricotiae	GCA_004382205.1	Calonectria_pseudonaviculata	GCA_001696505.1
Calonectria	Calonectria_henricotiae	GCA_004380935.1	Calonectria_pseudonaviculata	GCA_004382225.1
Calonectria	Calonectria_henricotiae	GCA_004380935.1	Calonectria_pseudonaviculata	GCA_004380985.1
Calonectria	Calonectria_henricotiae	GCA_004380935.1	Calonectria_pseudonaviculata	GCA_004381035.1
Calonectria	Calonectria_henricotiae	GCA_004380935.1	Calonectria_pseudonaviculata	GCA_004382245.1
Calonectria	Calonectria_henricotiae	GCA_004380935.1	Calonectria_pseudonaviculata	GCA_004141935.1
Calonectria	Calonectria_henricotiae	GCA_004380935.1	Calonectria_pseudonaviculata	GCA_004381005.1
Calonectria	Calonectria_henricotiae	GCA_004380935.1	Calonectria_pseudonaviculata	GCA_004380915.1
Calonectria	Calonectria_henricotiae	GCA_004380935.1	Calonectria_pseudonaviculata	GCA_006505905.1
Calonectria	Calonectria_henricotiae	GCA_004380935.1	Calonectria_pseudonaviculata	GCA_001696505.1
Calonectria	Calonectria_henricotiae	GCA_004380885.1	Calonectria_pseudonaviculata	GCA_004382225.1
Calonectria	Calonectria_henricotiae	GCA_004380885.1	Calonectria_pseudonaviculata	GCA_004380985.1
Calonectria	Calonectria_henricotiae	GCA_004380885.1	Calonectria_pseudonaviculata	GCA_004381035.1
Calonectria	Calonectria_henricotiae	GCA_004380885.1	Calonectria_pseudonaviculata	GCA_004382245.1
Calonectria	Calonectria_henricotiae	GCA_004380885.1	Calonectria_pseudonaviculata	GCA_004141935.1
Calonectria	Calonectria_henricotiae	GCA_004380885.1	Calonectria_pseudonaviculata	GCA_004381005.1
Calonectria	Calonectria_henricotiae	GCA_004380885.1	Calonectria_pseudonaviculata	GCA_004380915.1
Calonectria	Calonectria_henricotiae	GCA_004380885.1	Calonectria_pseudonaviculata	GCA_006505905.1
Calonectria	Calonectria_henricotiae	GCA_004380885.1	Calonectria_pseudonaviculata	GCA_001696505.1
Coccidioides	Coccidioides_posadasii	GCA_000150615.1	Coccidioides	GCA_000150085.1
Coccidioides	Coccidioides_posadasii	GCA_000150615.1	Coccidioides	GCA_004115165.2
Coccidioides	Coccidioides_posadasii	GCA_000150615.1	Coccidioides	GCA_000149895.1
Coccidioides	Coccidioides_posadasii	GCA_000150615.1	Coccidioides	GCA_000149815.1
Coccidioides	Coccidioides_posadasii	GCA_000150615.1	Coccidioides	GCA_000149335.2
Coccidioides	Coccidioides_posadasii	GCA_000151335.1	Coccidioides	GCA_000150085.1
Coccidioides	Coccidioides_posadasii	GCA_000151335.1	Coccidioides	GCA_004115165.2
Coccidioides	Coccidioides_posadasii	GCA_000151335.1	Coccidioides	GCA_000149895.1
Coccidioides	Coccidioides_posadasii	GCA_000151335.1	Coccidioides	GCA_000149815.1
Coccidioides	Coccidioides_posadasii	GCA_000151335.1	Coccidioides	GCA_000149335.2
Coccidioides	Coccidioides_posadasii	GCA_000150645.1	Coccidioides	GCA_000150085.1
Coccidioides	Coccidioides_posadasii	GCA_000150645.1	Coccidioides	GCA_004115165.2
Coccidioides	Coccidioides_posadasii	GCA_000150645.1	Coccidioides	GCA_000149895.1
Coccidioides	Coccidioides_posadasii	GCA_000150645.1	Coccidioides	GCA_000149815.1
Coccidioides	Coccidioides_posadasii	GCA_000150645.1	Coccidioides	GCA_000149335.2
Coccidioides	Coccidioides_posadasii	GCA_000150245.1	Coccidioides	GCA_000150085.1
Coccidioides	Coccidioides_posadasii	GCA_000150245.1	Coccidioides	GCA_004115165.2
Coccidioides	Coccidioides_posadasii	GCA_000150245.1	Coccidioides	GCA_000149895.1
Coccidioides	Coccidioides_posadasii	GCA_000150245.1	Coccidioides	GCA_000149815.1
Coccidioides	Coccidioides_posadasii	GCA_000150245.1	Coccidioides	GCA_000149335.2
Coccidioides	Coccidioides_posadasii	GCA_000170175.2	Coccidioides	GCA_000150085.1
Coccidioides	Coccidioides_posadasii	GCA_000170175.2	Coccidioides	GCA_004115165.2
Coccidioides	Coccidioides_posadasii	GCA_000170175.2	Coccidioides	GCA_000149895.1
Coccidioides	Coccidioides_posadasii	GCA_000170175.2	Coccidioides	GCA_000149815.1
Coccidioides	Coccidioides_posadasii	GCA_000170175.2	Coccidioides	GCA_000149335.2
Coccidioides	Coccidioides_posadasii	GCA_000150185.1	Coccidioides	GCA_000150085.1
Coccidioides	Coccidioides_posadasii	GCA_000150185.1	Coccidioides	GCA_004115165.2
Coccidioides	Coccidioides_posadasii	GCA_000150185.1	Coccidioides	GCA_000149895.1
Coccidioides	Coccidioides_posadasii	GCA_000150185.1	Coccidioides	GCA_000149815.1
Coccidioides	Coccidioides_posadasii	GCA_000150185.1	Coccidioides	GCA_000149335.2
Coccidioides	Coccidioides_posadasii	GCA_000150555.1	Coccidioides	GCA_000150085.1
Coccidioides	Coccidioides_posadasii	GCA_000150555.1	Coccidioides	GCA_004115165.2
Coccidioides	Coccidioides_posadasii	GCA_000150555.1	Coccidioides	GCA_000149895.1
Coccidioides	Coccidioides_posadasii	GCA_000150555.1	Coccidioides	GCA_000149815.1
Coccidioides	Coccidioides_posadasii	GCA_000150555.1	Coccidioides	GCA_000149335.2
Coccidioides	Coccidioides_posadasii	GCA_000150215.1	Coccidioides	GCA_000150085.1
Coccidioides	Coccidioides_posadasii	GCA_000150215.1	Coccidioides	GCA_004115165.2
Coccidioides	Coccidioides_posadasii	GCA_000150215.1	Coccidioides	GCA_000149895.1
Coccidioides	Coccidioides_posadasii	GCA_000150215.1	Coccidioides	GCA_000149815.1
Coccidioides	Coccidioides_posadasii	GCA_000150215.1	Coccidioides	GCA_000149335.2
Coccidioides	Coccidioides_posadasii	GCA_000150585.1	Coccidioides	GCA_000150085.1
Coccidioides	Coccidioides_posadasii	GCA_000150585.1	Coccidioides	GCA_004115165.2
Coccidioides	Coccidioides_posadasii	GCA_000150585.1	Coccidioides	GCA_000149895.1
Coccidioides	Coccidioides_posadasii	GCA_000150585.1	Coccidioides	GCA_000149815.1
Coccidioides	Coccidioides_posadasii	GCA_000150585.1	Coccidioides	GCA_000149335.2
Coccidioides	Coccidioides_posadasii	GCA_000150055.1	Coccidioides	GCA_000150085.1
Coccidioides	Coccidioides_posadasii	GCA_000150055.1	Coccidioides	GCA_004115165.2
Coccidioides	Coccidioides_posadasii	GCA_000150055.1	Coccidioides	GCA_000149895.1
Coccidioides	Coccidioides_posadasii	GCA_000150055.1	Coccidioides	GCA_000149815.1
Coccidioides	Coccidioides_posadasii	GCA_000150055.1	Coccidioides	GCA_000149335.2
Colletotrichum	Colletotrichum_gloeosporioides	GCA_002189585.1	Colletotrichum_fructicola	GCA_002314275.1
Colletotrichum	Colletotrichum_gloeosporioides	GCA_002189585.1	Colletotrichum_fructicola	GCA_002887685.1
Colletotrichum	Colletotrichum_gloeosporioides	GCA_002189585.1	Colletotrichum_fructicola	GCA_009771025.1
Colletotrichum	Colletotrichum_gloeosporioides	GCA_002189585.1	Colletotrichum_fructicola	GCA_000319635.1
Cryptococcus	Cryptococcus_gattii_VGII	GCA_000149475.3	Cryptococcus_gattii_VGI	GCA_000786445.1
Cryptococcus	Cryptococcus_gattii_VGII	GCA_000149475.3	Cryptococcus_gattii_VGI	GCA_000935105.1
Cryptococcus	Cryptococcus_gattii_VGII	GCA_000149475.3	Cryptococcus_gattii_VGI	GCA_000875815.1
Cryptococcus	Cryptococcus_gattii_VGII	GCA_000149475.3	Cryptococcus_gattii_VGI	GCA_000836355.1
Cryptococcus	Cryptococcus_gattii_VGII	GCA_000149475.3	Cryptococcus_gattii_VGI	GCA_000835745.1
Cryptococcus	Cryptococcus_gattii_VGII	GCA_000149475.3	Cryptococcus_gattii_VGI	GCA_000185945.1
Cryptococcus	Cryptococcus_gattii_VGII	GCA_000836455.1	Cryptococcus_gattii_VGI	GCA_000786445.1
Cryptococcus	Cryptococcus_gattii_VGII	GCA_000836455.1	Cryptococcus_gattii_VGI	GCA_000935105.1
Cryptococcus	Cryptococcus_gattii_VGII	GCA_000836455.1	Cryptococcus_gattii_VGI	GCA_000875815.1
Cryptococcus	Cryptococcus_gattii_VGII	GCA_000836455.1	Cryptococcus_gattii_VGI	GCA_000836355.1
Cryptococcus	Cryptococcus_gattii_VGII	GCA_000836455.1	Cryptococcus_gattii_VGI	GCA_000835745.1
Cryptococcus	Cryptococcus_gattii_VGII	GCA_000836455.1	Cryptococcus_gattii_VGI	GCA_000185945.1
Cryptococcus	Cryptococcus_gattii_VGII	GCA_000835815.1	Cryptococcus_gattii_VGI	GCA_000786445.1
Cryptococcus	Cryptococcus_gattii_VGII	GCA_000835815.1	Cryptococcus_gattii_VGI	GCA_000935105.1
Cryptococcus	Cryptococcus_gattii_VGII	GCA_000835815.1	Cryptococcus_gattii_VGI	GCA_000875815.1
Cryptococcus	Cryptococcus_gattii_VGII	GCA_000835815.1	Cryptococcus_gattii_VGI	GCA_000836355.1
Cryptococcus	Cryptococcus_gattii_VGII	GCA_000835815.1	Cryptococcus_gattii_VGI	GCA_000835745.1
Cryptococcus	Cryptococcus_gattii_VGII	GCA_000835815.1	Cryptococcus_gattii_VGI	GCA_000185945.1
Cryptococcus	Cryptococcus_gattii_VGII	GCA_000836375.1	Cryptococcus_gattii_VGI	GCA_000786445.1
Cryptococcus	Cryptococcus_gattii_VGII	GCA_000836375.1	Cryptococcus_gattii_VGI	GCA_000935105.1
Cryptococcus	Cryptococcus_gattii_VGII	GCA_000836375.1	Cryptococcus_gattii_VGI	GCA_000875815.1
Cryptococcus	Cryptococcus_gattii_VGII	GCA_000836375.1	Cryptococcus_gattii_VGI	GCA_000836355.1
Cryptococcus	Cryptococcus_gattii_VGII	GCA_000836375.1	Cryptococcus_gattii_VGI	GCA_000835745.1
Cryptococcus	Cryptococcus_gattii_VGII	GCA_000836375.1	Cryptococcus_gattii_VGI	GCA_000185945.1
Cryptococcus	Cryptococcus_gattii_VGII	GCA_000499585.1	Cryptococcus_gattii_VGI	GCA_000786445.1
Cryptococcus	Cryptococcus_gattii_VGII	GCA_000499585.1	Cryptococcus_gattii_VGI	GCA_000935105.1
Cryptococcus	Cryptococcus_gattii_VGII	GCA_000499585.1	Cryptococcus_gattii_VGI	GCA_000875815.1
Cryptococcus	Cryptococcus_gattii_VGII	GCA_000499585.1	Cryptococcus_gattii_VGI	GCA_000836355.1
Cryptococcus	Cryptococcus_gattii_VGII	GCA_000499585.1	Cryptococcus_gattii_VGI	GCA_000835745.1
Cryptococcus	Cryptococcus_gattii_VGII	GCA_000499585.1	Cryptococcus_gattii_VGI	GCA_000185945.1
Cryptococcus	Cryptococcus_gattii_VGII	GCA_002954075.1	Cryptococcus_gattii_VGI	GCA_000786445.1
Cryptococcus	Cryptococcus_gattii_VGII	GCA_002954075.1	Cryptococcus_gattii_VGI	GCA_000935105.1
Cryptococcus	Cryptococcus_gattii_VGII	GCA_002954075.1	Cryptococcus_gattii_VGI	GCA_000875815.1
Cryptococcus	Cryptococcus_gattii_VGII	GCA_002954075.1	Cryptococcus_gattii_VGI	GCA_000836355.1
Cryptococcus	Cryptococcus_gattii_VGII	GCA_002954075.1	Cryptococcus_gattii_VGI	GCA_000835745.1
Cryptococcus	Cryptococcus_gattii_VGII	GCA_002954075.1	Cryptococcus_gattii_VGI	GCA_000185945.1
Cryptococcus	Cryptococcus_gattii_VGII	GCA_003011995.1	Cryptococcus_gattii_VGI	GCA_000786445.1
Cryptococcus	Cryptococcus_gattii_VGII	GCA_003011995.1	Cryptococcus_gattii_VGI	GCA_000935105.1
Cryptococcus	Cryptococcus_gattii_VGII	GCA_003011995.1	Cryptococcus_gattii_VGI	GCA_000875815.1
Cryptococcus	Cryptococcus_gattii_VGII	GCA_003011995.1	Cryptococcus_gattii_VGI	GCA_000836355.1
Cryptococcus	Cryptococcus_gattii_VGII	GCA_003011995.1	Cryptococcus_gattii_VGI	GCA_000835745.1
Cryptococcus	Cryptococcus_gattii_VGII	GCA_003011995.1	Cryptococcus_gattii_VGI	GCA_000185945.1
Cryptococcus	Cryptococcus_gattii_VGII	GCA_000875855.1	Cryptococcus_gattii_VGI	GCA_000786445.1
Cryptococcus	Cryptococcus_gattii_VGII	GCA_000875855.1	Cryptococcus_gattii_VGI	GCA_000935105.1
Cryptococcus	Cryptococcus_gattii_VGII	GCA_000875855.1	Cryptococcus_gattii_VGI	GCA_000875815.1
Cryptococcus	Cryptococcus_gattii_VGII	GCA_000875855.1	Cryptococcus_gattii_VGI	GCA_000836355.1
Cryptococcus	Cryptococcus_gattii_VGII	GCA_000875855.1	Cryptococcus_gattii_VGI	GCA_000835745.1
Cryptococcus	Cryptococcus_gattii_VGII	GCA_000875855.1	Cryptococcus_gattii_VGI	GCA_000185945.1
Cryptococcus	Cryptococcus_gattii_VGII	GCA_000836315.1	Cryptococcus_gattii_VGI	GCA_000786445.1
Cryptococcus	Cryptococcus_gattii_VGII	GCA_000836315.1	Cryptococcus_gattii_VGI	GCA_000935105.1
Cryptococcus	Cryptococcus_gattii_VGII	GCA_000836315.1	Cryptococcus_gattii_VGI	GCA_000875815.1
Cryptococcus	Cryptococcus_gattii_VGII	GCA_000836315.1	Cryptococcus_gattii_VGI	GCA_000836355.1
Cryptococcus	Cryptococcus_gattii_VGII	GCA_000836315.1	Cryptococcus_gattii_VGI	GCA_000835745.1
Cryptococcus	Cryptococcus_gattii_VGII	GCA_000836315.1	Cryptococcus_gattii_VGI	GCA_000185945.1
Cryptococcus	Cryptococcus_gattii_VGII	GCA_000835765.1	Cryptococcus_gattii_VGI	GCA_000786445.1
Cryptococcus	Cryptococcus_gattii_VGII	GCA_000835765.1	Cryptococcus_gattii_VGI	GCA_000935105.1
Cryptococcus	Cryptococcus_gattii_VGII	GCA_000835765.1	Cryptococcus_gattii_VGI	GCA_000875815.1
Cryptococcus	Cryptococcus_gattii_VGII	GCA_000835765.1	Cryptococcus_gattii_VGI	GCA_000836355.1
Cryptococcus	Cryptococcus_gattii_VGII	GCA_000835765.1	Cryptococcus_gattii_VGI	GCA_000835745.1
Cryptococcus	Cryptococcus_gattii_VGII	GCA_000835765.1	Cryptococcus_gattii_VGI	GCA_000185945.1
Fusarium	Fusarium_pseudograminearum	GCA_000974265.2	Fusarium_meridionale	GCA_001717855.1
Fusarium	Fusarium_pseudograminearum	GCA_000974265.2	Fusarium_meridionale	GCA_009617515.1
Fusarium	Fusarium_pseudograminearum	GCA_000974265.2	Fusarium_meridionale	GCA_001717825.1
Fusarium	Fusarium_pseudograminearum	GCA_000974265.2	Fusarium_graminearum	GCA_006942295.1
Fusarium	Fusarium_pseudograminearum	GCA_000974265.2	Fusarium_graminearum	GCA_002352725.1
Fusarium	Fusarium_pseudograminearum	GCA_000974265.2	Fusarium_graminearum	GCA_001717915.1
Fusarium	Fusarium_pseudograminearum	GCA_000974265.2	Fusarium_graminearum	GCA_000966635.1
Fusarium	Fusarium_pseudograminearum	GCA_000974265.2	Fusarium_graminearum	GCA_001717905.1
Fusarium	Fusarium_pseudograminearum	GCA_000974265.2	Fusarium_graminearum	GCA_000599445.1
Fusarium	Fusarium_pseudograminearum	GCA_000974265.2	Fusarium_graminearum	GCA_900476405.1
Fusarium	Fusarium_pseudograminearum	GCA_000974265.2	Fusarium_graminearum	GCA_900492705.1
Fusarium	Fusarium_pseudograminearum	GCA_000974265.2	Fusarium_graminearum	GCA_000240135.3
Fusarium	Fusarium_pseudograminearum	GCA_000974265.2	Fusarium_graminearum	GCA_900044135.1
Fusarium	Fusarium_pseudograminearum	GCA_001703955.2	Fusarium_meridionale	GCA_001717855.1
Fusarium	Fusarium_pseudograminearum	GCA_001703955.2	Fusarium_meridionale	GCA_009617515.1
Fusarium	Fusarium_pseudograminearum	GCA_001703955.2	Fusarium_meridionale	GCA_001717825.1
Fusarium	Fusarium_pseudograminearum	GCA_001703955.2	Fusarium_graminearum	GCA_006942295.1
Fusarium	Fusarium_pseudograminearum	GCA_001703955.2	Fusarium_graminearum	GCA_002352725.1
Fusarium	Fusarium_pseudograminearum	GCA_001703955.2	Fusarium_graminearum	GCA_001717915.1
Fusarium	Fusarium_pseudograminearum	GCA_001703955.2	Fusarium_graminearum	GCA_000966635.1
Fusarium	Fusarium_pseudograminearum	GCA_001703955.2	Fusarium_graminearum	GCA_001717905.1
Fusarium	Fusarium_pseudograminearum	GCA_001703955.2	Fusarium_graminearum	GCA_000599445.1
Fusarium	Fusarium_pseudograminearum	GCA_001703955.2	Fusarium_graminearum	GCA_900476405.1
Fusarium	Fusarium_pseudograminearum	GCA_001703955.2	Fusarium_graminearum	GCA_900492705.1
Fusarium	Fusarium_pseudograminearum	GCA_001703955.2	Fusarium_graminearum	GCA_000240135.3
Fusarium	Fusarium_pseudograminearum	GCA_001703955.2	Fusarium_graminearum	GCA_900044135.1
Fusarium	Fusarium_pseudograminearum	GCA_000303195.2	Fusarium_meridionale	GCA_001717855.1
Fusarium	Fusarium_pseudograminearum	GCA_000303195.2	Fusarium_meridionale	GCA_009617515.1
Fusarium	Fusarium_pseudograminearum	GCA_000303195.2	Fusarium_meridionale	GCA_001717825.1
Fusarium	Fusarium_pseudograminearum	GCA_000303195.2	Fusarium_graminearum	GCA_006942295.1
Fusarium	Fusarium_pseudograminearum	GCA_000303195.2	Fusarium_graminearum	GCA_002352725.1
Fusarium	Fusarium_pseudograminearum	GCA_000303195.2	Fusarium_graminearum	GCA_001717915.1
Fusarium	Fusarium_pseudograminearum	GCA_000303195.2	Fusarium_graminearum	GCA_000966635.1
Fusarium	Fusarium_pseudograminearum	GCA_000303195.2	Fusarium_graminearum	GCA_001717905.1
Fusarium	Fusarium_pseudograminearum	GCA_000303195.2	Fusarium_graminearum	GCA_000599445.1
Fusarium	Fusarium_pseudograminearum	GCA_000303195.2	Fusarium_graminearum	GCA_900476405.1
Fusarium	Fusarium_pseudograminearum	GCA_000303195.2	Fusarium_graminearum	GCA_900492705.1
Fusarium	Fusarium_pseudograminearum	GCA_000303195.2	Fusarium_graminearum	GCA_000240135.3
Fusarium	Fusarium_pseudograminearum	GCA_000303195.2	Fusarium_graminearum	GCA_900044135.1
Fusarium	Fusarium_tucumaniae	GCA_001680725.1	Fusarium_virguliforme	GCA_001680525.1
Fusarium	Fusarium_tucumaniae	GCA_001680725.1	Fusarium_virguliforme	GCA_000585705.1
Fusarium	Fusarium_tucumaniae	GCA_001680725.1	Fusarium_virguliforme	GCA_001680665.1
Fusarium	Fusarium_tucumaniae	GCA_001680725.1	Fusarium_virguliforme	GCA_001680605.1
Fusarium	Fusarium_tucumaniae	GCA_001680595.1	Fusarium_virguliforme	GCA_001680525.1
Fusarium	Fusarium_tucumaniae	GCA_001680595.1	Fusarium_virguliforme	GCA_000585705.1
Fusarium	Fusarium_tucumaniae	GCA_001680595.1	Fusarium_virguliforme	GCA_001680665.1
Fusarium	Fusarium_tucumaniae	GCA_001680595.1	Fusarium_virguliforme	GCA_001680605.1
Fusarium	Fusarium_tucumaniae	GCA_001680535.1	Fusarium_virguliforme	GCA_001680525.1
Fusarium	Fusarium_tucumaniae	GCA_001680535.1	Fusarium_virguliforme	GCA_000585705.1
Fusarium	Fusarium_tucumaniae	GCA_001680535.1	Fusarium_virguliforme	GCA_001680665.1
Fusarium	Fusarium_tucumaniae	GCA_001680535.1	Fusarium_virguliforme	GCA_001680605.1
Fusarium	Fusarium_meridionale	GCA_001717855.1	Fusarium_graminearum	GCA_006942295.1
Fusarium	Fusarium_meridionale	GCA_001717855.1	Fusarium_graminearum	GCA_002352725.1
Fusarium	Fusarium_meridionale	GCA_001717855.1	Fusarium_graminearum	GCA_001717915.1
Fusarium	Fusarium_meridionale	GCA_001717855.1	Fusarium_graminearum	GCA_000966635.1
Fusarium	Fusarium_meridionale	GCA_001717855.1	Fusarium_graminearum	GCA_001717905.1
Fusarium	Fusarium_meridionale	GCA_001717855.1	Fusarium_graminearum	GCA_000599445.1
Fusarium	Fusarium_meridionale	GCA_001717855.1	Fusarium_graminearum	GCA_900476405.1
Fusarium	Fusarium_meridionale	GCA_001717855.1	Fusarium_graminearum	GCA_900492705.1
Fusarium	Fusarium_meridionale	GCA_001717855.1	Fusarium_graminearum	GCA_000240135.3
Fusarium	Fusarium_meridionale	GCA_001717855.1	Fusarium_graminearum	GCA_900044135.1
Fusarium	Fusarium_meridionale	GCA_009617515.1	Fusarium_graminearum	GCA_006942295.1
Fusarium	Fusarium_meridionale	GCA_009617515.1	Fusarium_graminearum	GCA_002352725.1
Fusarium	Fusarium_meridionale	GCA_009617515.1	Fusarium_graminearum	GCA_001717915.1
Fusarium	Fusarium_meridionale	GCA_009617515.1	Fusarium_graminearum	GCA_000966635.1
Fusarium	Fusarium_meridionale	GCA_009617515.1	Fusarium_graminearum	GCA_001717905.1
Fusarium	Fusarium_meridionale	GCA_009617515.1	Fusarium_graminearum	GCA_000599445.1
Fusarium	Fusarium_meridionale	GCA_009617515.1	Fusarium_graminearum	GCA_900476405.1
Fusarium	Fusarium_meridionale	GCA_009617515.1	Fusarium_graminearum	GCA_900492705.1
Fusarium	Fusarium_meridionale	GCA_009617515.1	Fusarium_graminearum	GCA_000240135.3
Fusarium	Fusarium_meridionale	GCA_009617515.1	Fusarium_graminearum	GCA_900044135.1
Fusarium	Fusarium_meridionale	GCA_001717825.1	Fusarium_graminearum	GCA_006942295.1
Fusarium	Fusarium_meridionale	GCA_001717825.1	Fusarium_graminearum	GCA_002352725.1
Fusarium	Fusarium_meridionale	GCA_001717825.1	Fusarium_graminearum	GCA_001717915.1
Fusarium	Fusarium_meridionale	GCA_001717825.1	Fusarium_graminearum	GCA_000966635.1
Fusarium	Fusarium_meridionale	GCA_001717825.1	Fusarium_graminearum	GCA_001717905.1
Fusarium	Fusarium_meridionale	GCA_001717825.1	Fusarium_graminearum	GCA_000599445.1
Fusarium	Fusarium_meridionale	GCA_001717825.1	Fusarium_graminearum	GCA_900476405.1
Fusarium	Fusarium_meridionale	GCA_001717825.1	Fusarium_graminearum	GCA_900492705.1
Fusarium	Fusarium_meridionale	GCA_001717825.1	Fusarium_graminearum	GCA_000240135.3
Fusarium	Fusarium_meridionale	GCA_001717825.1	Fusarium_graminearum	GCA_900044135.1
Fusarium	Fusarium_fujikuroi	GCA_900096685.1	Fusarium_proliferatum	GCA_003290285.1
Fusarium	Fusarium_fujikuroi	GCA_900096685.1	Fusarium_proliferatum	GCA_003704885.1
Fusarium	Fusarium_fujikuroi	GCA_900096685.1	Fusarium_proliferatum	GCA_900067095.1
Fusarium	Fusarium_fujikuroi	GCA_900096685.1	Fusarium_proliferatum	GCA_001705295.1
Fusarium	Fusarium_fujikuroi	GCA_900096685.1	Fusarium_proliferatum	GCA_003704875.1
Fusarium	Fusarium_fujikuroi	GCA_900096685.1	Fusarium_proliferatum	GCA_003704965.1
Fusarium	Fusarium_fujikuroi	GCA_900096685.1	Fusarium_proliferatum	GCA_002234285.1
Fusarium	Fusarium_fujikuroi	GCA_900096685.1	Fusarium_proliferatum	GCA_003123625.1
Fusarium	Fusarium_fujikuroi	GCA_900096685.1	Fusarium_proliferatum	GCA_003704895.1
Fusarium	Fusarium_fujikuroi	GCA_900096685.1	Fusarium_proliferatum	GCA_003705095.1
Fusarium	Fusarium_fujikuroi	GCA_900096625.1	Fusarium_proliferatum	GCA_003290285.1
Fusarium	Fusarium_fujikuroi	GCA_900096625.1	Fusarium_proliferatum	GCA_003704885.1
Fusarium	Fusarium_fujikuroi	GCA_900096625.1	Fusarium_proliferatum	GCA_900067095.1
Fusarium	Fusarium_fujikuroi	GCA_900096625.1	Fusarium_proliferatum	GCA_001705295.1
Fusarium	Fusarium_fujikuroi	GCA_900096625.1	Fusarium_proliferatum	GCA_003704875.1
Fusarium	Fusarium_fujikuroi	GCA_900096625.1	Fusarium_proliferatum	GCA_003704965.1
Fusarium	Fusarium_fujikuroi	GCA_900096625.1	Fusarium_proliferatum	GCA_002234285.1
Fusarium	Fusarium_fujikuroi	GCA_900096625.1	Fusarium_proliferatum	GCA_003123625.1
Fusarium	Fusarium_fujikuroi	GCA_900096625.1	Fusarium_proliferatum	GCA_003704895.1
Fusarium	Fusarium_fujikuroi	GCA_900096625.1	Fusarium_proliferatum	GCA_003705095.1
Fusarium	Fusarium_fujikuroi	GCA_900096605.1	Fusarium_proliferatum	GCA_003290285.1
Fusarium	Fusarium_fujikuroi	GCA_900096605.1	Fusarium_proliferatum	GCA_003704885.1
Fusarium	Fusarium_fujikuroi	GCA_900096605.1	Fusarium_proliferatum	GCA_900067095.1
Fusarium	Fusarium_fujikuroi	GCA_900096605.1	Fusarium_proliferatum	GCA_001705295.1
Fusarium	Fusarium_fujikuroi	GCA_900096605.1	Fusarium_proliferatum	GCA_003704875.1
Fusarium	Fusarium_fujikuroi	GCA_900096605.1	Fusarium_proliferatum	GCA_003704965.1
Fusarium	Fusarium_fujikuroi	GCA_900096605.1	Fusarium_proliferatum	GCA_002234285.1
Fusarium	Fusarium_fujikuroi	GCA_900096605.1	Fusarium_proliferatum	GCA_003123625.1
Fusarium	Fusarium_fujikuroi	GCA_900096605.1	Fusarium_proliferatum	GCA_003704895.1
Fusarium	Fusarium_fujikuroi	GCA_900096605.1	Fusarium_proliferatum	GCA_003705095.1
Fusarium	Fusarium_fujikuroi	GCA_900079805.1	Fusarium_proliferatum	GCA_003290285.1
Fusarium	Fusarium_fujikuroi	GCA_900079805.1	Fusarium_proliferatum	GCA_003704885.1
Fusarium	Fusarium_fujikuroi	GCA_900079805.1	Fusarium_proliferatum	GCA_900067095.1
Fusarium	Fusarium_fujikuroi	GCA_900079805.1	Fusarium_proliferatum	GCA_001705295.1
Fusarium	Fusarium_fujikuroi	GCA_900079805.1	Fusarium_proliferatum	GCA_003704875.1
Fusarium	Fusarium_fujikuroi	GCA_900079805.1	Fusarium_proliferatum	GCA_003704965.1
Fusarium	Fusarium_fujikuroi	GCA_900079805.1	Fusarium_proliferatum	GCA_002234285.1
Fusarium	Fusarium_fujikuroi	GCA_900079805.1	Fusarium_proliferatum	GCA_003123625.1
Fusarium	Fusarium_fujikuroi	GCA_900079805.1	Fusarium_proliferatum	GCA_003704895.1
Fusarium	Fusarium_fujikuroi	GCA_900079805.1	Fusarium_proliferatum	GCA_003705095.1
Fusarium	Fusarium_fujikuroi	GCA_009663055.1	Fusarium_proliferatum	GCA_003290285.1
Fusarium	Fusarium_fujikuroi	GCA_009663055.1	Fusarium_proliferatum	GCA_003704885.1
Fusarium	Fusarium_fujikuroi	GCA_009663055.1	Fusarium_proliferatum	GCA_900067095.1
Fusarium	Fusarium_fujikuroi	GCA_009663055.1	Fusarium_proliferatum	GCA_001705295.1
Fusarium	Fusarium_fujikuroi	GCA_009663055.1	Fusarium_proliferatum	GCA_003704875.1
Fusarium	Fusarium_fujikuroi	GCA_009663055.1	Fusarium_proliferatum	GCA_003704965.1
Fusarium	Fusarium_fujikuroi	GCA_009663055.1	Fusarium_proliferatum	GCA_002234285.1
Fusarium	Fusarium_fujikuroi	GCA_009663055.1	Fusarium_proliferatum	GCA_003123625.1
Fusarium	Fusarium_fujikuroi	GCA_009663055.1	Fusarium_proliferatum	GCA_003704895.1
Fusarium	Fusarium_fujikuroi	GCA_009663055.1	Fusarium_proliferatum	GCA_003705095.1
Fusarium	Fusarium_fujikuroi	GCA_900096635.1	Fusarium_proliferatum	GCA_003290285.1
Fusarium	Fusarium_fujikuroi	GCA_900096635.1	Fusarium_proliferatum	GCA_003704885.1
Fusarium	Fusarium_fujikuroi	GCA_900096635.1	Fusarium_proliferatum	GCA_900067095.1
Fusarium	Fusarium_fujikuroi	GCA_900096635.1	Fusarium_proliferatum	GCA_001705295.1
Fusarium	Fusarium_fujikuroi	GCA_900096635.1	Fusarium_proliferatum	GCA_003704875.1
Fusarium	Fusarium_fujikuroi	GCA_900096635.1	Fusarium_proliferatum	GCA_003704965.1
Fusarium	Fusarium_fujikuroi	GCA_900096635.1	Fusarium_proliferatum	GCA_002234285.1
Fusarium	Fusarium_fujikuroi	GCA_900096635.1	Fusarium_proliferatum	GCA_003123625.1
Fusarium	Fusarium_fujikuroi	GCA_900096635.1	Fusarium_proliferatum	GCA_003704895.1
Fusarium	Fusarium_fujikuroi	GCA_900096635.1	Fusarium_proliferatum	GCA_003705095.1
Fusarium	Fusarium_fujikuroi	GCA_001023035.1	Fusarium_proliferatum	GCA_003290285.1
Fusarium	Fusarium_fujikuroi	GCA_001023035.1	Fusarium_proliferatum	GCA_003704885.1
Fusarium	Fusarium_fujikuroi	GCA_001023035.1	Fusarium_proliferatum	GCA_900067095.1
Fusarium	Fusarium_fujikuroi	GCA_001023035.1	Fusarium_proliferatum	GCA_001705295.1
Fusarium	Fusarium_fujikuroi	GCA_001023035.1	Fusarium_proliferatum	GCA_003704875.1
Fusarium	Fusarium_fujikuroi	GCA_001023035.1	Fusarium_proliferatum	GCA_003704965.1
Fusarium	Fusarium_fujikuroi	GCA_001023035.1	Fusarium_proliferatum	GCA_002234285.1
Fusarium	Fusarium_fujikuroi	GCA_001023035.1	Fusarium_proliferatum	GCA_003123625.1
Fusarium	Fusarium_fujikuroi	GCA_001023035.1	Fusarium_proliferatum	GCA_003704895.1
Fusarium	Fusarium_fujikuroi	GCA_001023035.1	Fusarium_proliferatum	GCA_003705095.1
Fusarium	Fusarium_fujikuroi	GCA_009663115.1	Fusarium_proliferatum	GCA_003290285.1
Fusarium	Fusarium_fujikuroi	GCA_009663115.1	Fusarium_proliferatum	GCA_003704885.1
Fusarium	Fusarium_fujikuroi	GCA_009663115.1	Fusarium_proliferatum	GCA_900067095.1
Fusarium	Fusarium_fujikuroi	GCA_009663115.1	Fusarium_proliferatum	GCA_001705295.1
Fusarium	Fusarium_fujikuroi	GCA_009663115.1	Fusarium_proliferatum	GCA_003704875.1
Fusarium	Fusarium_fujikuroi	GCA_009663115.1	Fusarium_proliferatum	GCA_003704965.1
Fusarium	Fusarium_fujikuroi	GCA_009663115.1	Fusarium_proliferatum	GCA_002234285.1
Fusarium	Fusarium_fujikuroi	GCA_009663115.1	Fusarium_proliferatum	GCA_003123625.1
Fusarium	Fusarium_fujikuroi	GCA_009663115.1	Fusarium_proliferatum	GCA_003704895.1
Fusarium	Fusarium_fujikuroi	GCA_009663115.1	Fusarium_proliferatum	GCA_003705095.1
Fusarium	Fusarium_fujikuroi	GCA_002864135.1	Fusarium_proliferatum	GCA_003290285.1
Fusarium	Fusarium_fujikuroi	GCA_002864135.1	Fusarium_proliferatum	GCA_003704885.1
Fusarium	Fusarium_fujikuroi	GCA_002864135.1	Fusarium_proliferatum	GCA_900067095.1
Fusarium	Fusarium_fujikuroi	GCA_002864135.1	Fusarium_proliferatum	GCA_001705295.1
Fusarium	Fusarium_fujikuroi	GCA_002864135.1	Fusarium_proliferatum	GCA_003704875.1
Fusarium	Fusarium_fujikuroi	GCA_002864135.1	Fusarium_proliferatum	GCA_003704965.1
Fusarium	Fusarium_fujikuroi	GCA_002864135.1	Fusarium_proliferatum	GCA_002234285.1
Fusarium	Fusarium_fujikuroi	GCA_002864135.1	Fusarium_proliferatum	GCA_003123625.1
Fusarium	Fusarium_fujikuroi	GCA_002864135.1	Fusarium_proliferatum	GCA_003704895.1
Fusarium	Fusarium_fujikuroi	GCA_002864135.1	Fusarium_proliferatum	GCA_003705095.1
Fusarium	Fusarium_fujikuroi	GCA_009800985.1	Fusarium_proliferatum	GCA_003290285.1
Fusarium	Fusarium_fujikuroi	GCA_009800985.1	Fusarium_proliferatum	GCA_003704885.1
Fusarium	Fusarium_fujikuroi	GCA_009800985.1	Fusarium_proliferatum	GCA_900067095.1
Fusarium	Fusarium_fujikuroi	GCA_009800985.1	Fusarium_proliferatum	GCA_001705295.1
Fusarium	Fusarium_fujikuroi	GCA_009800985.1	Fusarium_proliferatum	GCA_003704875.1
Fusarium	Fusarium_fujikuroi	GCA_009800985.1	Fusarium_proliferatum	GCA_003704965.1
Fusarium	Fusarium_fujikuroi	GCA_009800985.1	Fusarium_proliferatum	GCA_002234285.1
Fusarium	Fusarium_fujikuroi	GCA_009800985.1	Fusarium_proliferatum	GCA_003123625.1
Fusarium	Fusarium_fujikuroi	GCA_009800985.1	Fusarium_proliferatum	GCA_003704895.1
Fusarium	Fusarium_fujikuroi	GCA_009800985.1	Fusarium_proliferatum	GCA_003705095.1
Heterobasidion	Heterobasidion_annosum	GCA_001457955.1	Heterobasidion_irregulare	GCA_001457915.1
Heterobasidion	Heterobasidion_annosum	GCA_001457955.1	Heterobasidion_irregulare	GCA_001457935.1
Heterobasidion	Heterobasidion_annosum	GCA_001457955.1	Heterobasidion_irregulare	GCA_000320585.2
Heterobasidion	Heterobasidion_annosum	GCA_001457955.1	Heterobasidion_irregulare	GCA_001458015.1
Heterobasidion	Heterobasidion_annosum	GCA_001457995.1	Heterobasidion_irregulare	GCA_001457915.1
Heterobasidion	Heterobasidion_annosum	GCA_001457995.1	Heterobasidion_irregulare	GCA_001457935.1
Heterobasidion	Heterobasidion_annosum	GCA_001457995.1	Heterobasidion_irregulare	GCA_000320585.2
Heterobasidion	Heterobasidion_annosum	GCA_001457995.1	Heterobasidion_irregulare	GCA_001458015.1
Heterobasidion	Heterobasidion_annosum	GCA_001457895.1	Heterobasidion_irregulare	GCA_001457915.1
Heterobasidion	Heterobasidion_annosum	GCA_001457895.1	Heterobasidion_irregulare	GCA_001457935.1
Heterobasidion	Heterobasidion_annosum	GCA_001457895.1	Heterobasidion_irregulare	GCA_000320585.2
Heterobasidion	Heterobasidion_annosum	GCA_001457895.1	Heterobasidion_irregulare	GCA_001458015.1
Heterobasidion	Heterobasidion_annosum	GCA_000633895.1	Heterobasidion_irregulare	GCA_001457915.1
Heterobasidion	Heterobasidion_annosum	GCA_000633895.1	Heterobasidion_irregulare	GCA_001457935.1
Heterobasidion	Heterobasidion_annosum	GCA_000633895.1	Heterobasidion_irregulare	GCA_000320585.2
Heterobasidion	Heterobasidion_annosum	GCA_000633895.1	Heterobasidion_irregulare	GCA_001458015.1
Komagataella	Komagataella_phaffii	GCA_000027005.1	Komagataella_pastoris	GCA_900007765.1
Komagataella	Komagataella_phaffii	GCA_000027005.1	Komagataella_pastoris	GCA_900016415.1
Komagataella	Komagataella_phaffii	GCA_000027005.1	Komagataella_pastoris	GCA_900016605.1
Komagataella	Komagataella_phaffii	GCA_000027005.1	Komagataella_pastoris	GCA_900016485.1
Komagataella	Komagataella_phaffii	GCA_000027005.1	Komagataella_pastoris	GCA_900013415.1
Komagataella	Komagataella_phaffii	GCA_000027005.1	Komagataella_pastoris	GCA_900007755.1
Komagataella	Komagataella_phaffii	GCA_000027005.1	Komagataella_pastoris	GCA_900016535.1
Komagataella	Komagataella_phaffii	GCA_000027005.1	Komagataella_pastoris	GCA_900016525.1
Komagataella	Komagataella_phaffii	GCA_000027005.1	Komagataella_pastoris	GCA_900009515.1
Komagataella	Komagataella_phaffii	GCA_000027005.1	Komagataella_pastoris	GCA_900016425.1
Komagataella	Komagataella_phaffii	GCA_900235035.1	Komagataella_pastoris	GCA_900007765.1
Komagataella	Komagataella_phaffii	GCA_900235035.1	Komagataella_pastoris	GCA_900016415.1
Komagataella	Komagataella_phaffii	GCA_900235035.1	Komagataella_pastoris	GCA_900016605.1
Komagataella	Komagataella_phaffii	GCA_900235035.1	Komagataella_pastoris	GCA_900016485.1
Komagataella	Komagataella_phaffii	GCA_900235035.1	Komagataella_pastoris	GCA_900013415.1
Komagataella	Komagataella_phaffii	GCA_900235035.1	Komagataella_pastoris	GCA_900007755.1
Komagataella	Komagataella_phaffii	GCA_900235035.1	Komagataella_pastoris	GCA_900016535.1
Komagataella	Komagataella_phaffii	GCA_900235035.1	Komagataella_pastoris	GCA_900016525.1
Komagataella	Komagataella_phaffii	GCA_900235035.1	Komagataella_pastoris	GCA_900009515.1
Komagataella	Komagataella_phaffii	GCA_900235035.1	Komagataella_pastoris	GCA_900016425.1
Komagataella	Komagataella_phaffii	GCA_000223565.1	Komagataella_pastoris	GCA_900007765.1
Komagataella	Komagataella_phaffii	GCA_000223565.1	Komagataella_pastoris	GCA_900016415.1
Komagataella	Komagataella_phaffii	GCA_000223565.1	Komagataella_pastoris	GCA_900016605.1
Komagataella	Komagataella_phaffii	GCA_000223565.1	Komagataella_pastoris	GCA_900016485.1
Komagataella	Komagataella_phaffii	GCA_000223565.1	Komagataella_pastoris	GCA_900013415.1
Komagataella	Komagataella_phaffii	GCA_000223565.1	Komagataella_pastoris	GCA_900007755.1
Komagataella	Komagataella_phaffii	GCA_000223565.1	Komagataella_pastoris	GCA_900016535.1
Komagataella	Komagataella_phaffii	GCA_000223565.1	Komagataella_pastoris	GCA_900016525.1
Komagataella	Komagataella_phaffii	GCA_000223565.1	Komagataella_pastoris	GCA_900009515.1
Komagataella	Komagataella_phaffii	GCA_000223565.1	Komagataella_pastoris	GCA_900016425.1
Komagataella	Komagataella_phaffii	GCA_900234805.1	Komagataella_pastoris	GCA_900007765.1
Komagataella	Komagataella_phaffii	GCA_900234805.1	Komagataella_pastoris	GCA_900016415.1
Komagataella	Komagataella_phaffii	GCA_900234805.1	Komagataella_pastoris	GCA_900016605.1
Komagataella	Komagataella_phaffii	GCA_900234805.1	Komagataella_pastoris	GCA_900016485.1
Komagataella	Komagataella_phaffii	GCA_900234805.1	Komagataella_pastoris	GCA_900013415.1
Komagataella	Komagataella_phaffii	GCA_900234805.1	Komagataella_pastoris	GCA_900007755.1
Komagataella	Komagataella_phaffii	GCA_900234805.1	Komagataella_pastoris	GCA_900016535.1
Komagataella	Komagataella_phaffii	GCA_900234805.1	Komagataella_pastoris	GCA_900016525.1
Komagataella	Komagataella_phaffii	GCA_900234805.1	Komagataella_pastoris	GCA_900009515.1
Komagataella	Komagataella_phaffii	GCA_900234805.1	Komagataella_pastoris	GCA_900016425.1
Komagataella	Komagataella_phaffii	GCA_001708085.1	Komagataella_pastoris	GCA_900007765.1
Komagataella	Komagataella_phaffii	GCA_001708085.1	Komagataella_pastoris	GCA_900016415.1
Komagataella	Komagataella_phaffii	GCA_001708085.1	Komagataella_pastoris	GCA_900016605.1
Komagataella	Komagataella_phaffii	GCA_001708085.1	Komagataella_pastoris	GCA_900016485.1
Komagataella	Komagataella_phaffii	GCA_001708085.1	Komagataella_pastoris	GCA_900013415.1
Komagataella	Komagataella_phaffii	GCA_001708085.1	Komagataella_pastoris	GCA_900007755.1
Komagataella	Komagataella_phaffii	GCA_001708085.1	Komagataella_pastoris	GCA_900016535.1
Komagataella	Komagataella_phaffii	GCA_001708085.1	Komagataella_pastoris	GCA_900016525.1
Komagataella	Komagataella_phaffii	GCA_001708085.1	Komagataella_pastoris	GCA_900009515.1
Komagataella	Komagataella_phaffii	GCA_001708085.1	Komagataella_pastoris	GCA_900016425.1
Komagataella	Komagataella_phaffii	GCA_001746955.1	Komagataella_pastoris	GCA_900007765.1
Komagataella	Komagataella_phaffii	GCA_001746955.1	Komagataella_pastoris	GCA_900016415.1
Komagataella	Komagataella_phaffii	GCA_001746955.1	Komagataella_pastoris	GCA_900016605.1
Komagataella	Komagataella_phaffii	GCA_001746955.1	Komagataella_pastoris	GCA_900016485.1
Komagataella	Komagataella_phaffii	GCA_001746955.1	Komagataella_pastoris	GCA_900013415.1
Komagataella	Komagataella_phaffii	GCA_001746955.1	Komagataella_pastoris	GCA_900007755.1
Komagataella	Komagataella_phaffii	GCA_001746955.1	Komagataella_pastoris	GCA_900016535.1
Komagataella	Komagataella_phaffii	GCA_001746955.1	Komagataella_pastoris	GCA_900016525.1
Komagataella	Komagataella_phaffii	GCA_001746955.1	Komagataella_pastoris	GCA_900009515.1
Komagataella	Komagataella_phaffii	GCA_001746955.1	Komagataella_pastoris	GCA_900016425.1
Metschnikowia	Metschnikowia_bowlesiae	GCA_002370825.1	Metschnikowia_dekortorum	GCA_002374455.1
Metschnikowia	Metschnikowia_bowlesiae	GCA_002370825.1	Metschnikowia_dekortorum	GCA_009756545.1
Metschnikowia	Metschnikowia_bowlesiae	GCA_002370825.1	Metschnikowia_dekortorum	GCA_002370735.1
Metschnikowia	Metschnikowia_bowlesiae	GCA_002374615.1	Metschnikowia_dekortorum	GCA_002374455.1
Metschnikowia	Metschnikowia_bowlesiae	GCA_002374615.1	Metschnikowia_dekortorum	GCA_009756545.1
Metschnikowia	Metschnikowia_bowlesiae	GCA_002374615.1	Metschnikowia_dekortorum	GCA_002370735.1
Metschnikowia	Metschnikowia_bowlesiae	GCA_002370295.1	Metschnikowia_dekortorum	GCA_002374455.1
Metschnikowia	Metschnikowia_bowlesiae	GCA_002370295.1	Metschnikowia_dekortorum	GCA_009756545.1
Metschnikowia	Metschnikowia_bowlesiae	GCA_002370295.1	Metschnikowia_dekortorum	GCA_002370735.1
Meyerozyma	Meyerozyma_guilliermondii	GCA_008062615.1	Meyerozyma_caribbica	GCA_000755205.1
Meyerozyma	Meyerozyma_guilliermondii	GCA_009756405.1	Meyerozyma_caribbica	GCA_000755205.1
Meyerozyma	Meyerozyma_guilliermondii	GCA_000149425.1	Meyerozyma_caribbica	GCA_000755205.1
Meyerozyma	Meyerozyma_guilliermondii	GCA_008000345.1	Meyerozyma_caribbica	GCA_000755205.1
Meyerozyma	Meyerozyma_guilliermondii	GCA_006942155.1	Meyerozyma_caribbica	GCA_000755205.1
Meyerozyma	Meyerozyma_guilliermondii	GCA_900500645.1	Meyerozyma_caribbica	GCA_000755205.1
Meyerozyma	Meyerozyma_guilliermondii	GCA_900174495.1	Meyerozyma_caribbica	GCA_000755205.1
Microbotryum	Microbotryum_lychnidisdioicae	GCA_900010535.1	Microbotryum_violaceum	GCA_900009495.1
Microbotryum	Microbotryum_lychnidisdioicae	GCA_900010535.1	Microbotryum_violaceum	GCA_900015435.1
Microbotryum	Microbotryum_lychnidisdioicae	GCA_900010535.1	Microbotryum_violaceum	GCA_900015965.1
Microbotryum	Microbotryum_lychnidisdioicae	GCA_900010535.1	Microbotryum_violaceum	GCA_900015425.1
Microbotryum	Microbotryum_lychnidisdioicae	GCA_900010535.1	Microbotryum_violaceum	GCA_900015455.1
Microbotryum	Microbotryum_lychnidisdioicae	GCA_900010535.1	Microbotryum_violaceum	GCA_900011735.1
Microbotryum	Microbotryum_lychnidisdioicae	GCA_900012385.1	Microbotryum_violaceum	GCA_900009495.1
Microbotryum	Microbotryum_lychnidisdioicae	GCA_900012385.1	Microbotryum_violaceum	GCA_900015435.1
Microbotryum	Microbotryum_lychnidisdioicae	GCA_900012385.1	Microbotryum_violaceum	GCA_900015965.1
Microbotryum	Microbotryum_lychnidisdioicae	GCA_900012385.1	Microbotryum_violaceum	GCA_900015425.1
Microbotryum	Microbotryum_lychnidisdioicae	GCA_900012385.1	Microbotryum_violaceum	GCA_900015455.1
Microbotryum	Microbotryum_lychnidisdioicae	GCA_900012385.1	Microbotryum_violaceum	GCA_900011735.1
Microbotryum	Microbotryum_lychnidisdioicae	GCA_900011025.1	Microbotryum_violaceum	GCA_900009495.1
Microbotryum	Microbotryum_lychnidisdioicae	GCA_900011025.1	Microbotryum_violaceum	GCA_900015435.1
Microbotryum	Microbotryum_lychnidisdioicae	GCA_900011025.1	Microbotryum_violaceum	GCA_900015965.1
Microbotryum	Microbotryum_lychnidisdioicae	GCA_900011025.1	Microbotryum_violaceum	GCA_900015425.1
Microbotryum	Microbotryum_lychnidisdioicae	GCA_900011025.1	Microbotryum_violaceum	GCA_900015455.1
Microbotryum	Microbotryum_lychnidisdioicae	GCA_900011025.1	Microbotryum_violaceum	GCA_900011735.1
Microbotryum	Microbotryum_lychnidisdioicae	GCA_900015445.1	Microbotryum_violaceum	GCA_900009495.1
Microbotryum	Microbotryum_lychnidisdioicae	GCA_900015445.1	Microbotryum_violaceum	GCA_900015435.1
Microbotryum	Microbotryum_lychnidisdioicae	GCA_900015445.1	Microbotryum_violaceum	GCA_900015965.1
Microbotryum	Microbotryum_lychnidisdioicae	GCA_900015445.1	Microbotryum_violaceum	GCA_900015425.1
Microbotryum	Microbotryum_lychnidisdioicae	GCA_900015445.1	Microbotryum_violaceum	GCA_900015455.1
Microbotryum	Microbotryum_lychnidisdioicae	GCA_900015445.1	Microbotryum_violaceum	GCA_900011735.1
Microbotryum	Microbotryum_lychnidisdioicae	GCA_000166175.1	Microbotryum_violaceum	GCA_900009495.1
Microbotryum	Microbotryum_lychnidisdioicae	GCA_000166175.1	Microbotryum_violaceum	GCA_900015435.1
Microbotryum	Microbotryum_lychnidisdioicae	GCA_000166175.1	Microbotryum_violaceum	GCA_900015965.1
Microbotryum	Microbotryum_lychnidisdioicae	GCA_000166175.1	Microbotryum_violaceum	GCA_900015425.1
Microbotryum	Microbotryum_lychnidisdioicae	GCA_000166175.1	Microbotryum_violaceum	GCA_900015455.1
Microbotryum	Microbotryum_lychnidisdioicae	GCA_000166175.1	Microbotryum_violaceum	GCA_900011735.1
Microbotryum	Microbotryum_lychnidisdioicae	GCA_003121355.1	Microbotryum_violaceum	GCA_900009495.1
Microbotryum	Microbotryum_lychnidisdioicae	GCA_003121355.1	Microbotryum_violaceum	GCA_900015435.1
Microbotryum	Microbotryum_lychnidisdioicae	GCA_003121355.1	Microbotryum_violaceum	GCA_900015965.1
Microbotryum	Microbotryum_lychnidisdioicae	GCA_003121355.1	Microbotryum_violaceum	GCA_900015425.1
Microbotryum	Microbotryum_lychnidisdioicae	GCA_003121355.1	Microbotryum_violaceum	GCA_900015455.1
Microbotryum	Microbotryum_lychnidisdioicae	GCA_003121355.1	Microbotryum_violaceum	GCA_900011735.1
Microbotryum	Microbotryum_lychnidisdioicae	GCA_900009975.1	Microbotryum_violaceum	GCA_900009495.1
Microbotryum	Microbotryum_lychnidisdioicae	GCA_900009975.1	Microbotryum_violaceum	GCA_900015435.1
Microbotryum	Microbotryum_lychnidisdioicae	GCA_900009975.1	Microbotryum_violaceum	GCA_900015965.1
Microbotryum	Microbotryum_lychnidisdioicae	GCA_900009975.1	Microbotryum_violaceum	GCA_900015425.1
Microbotryum	Microbotryum_lychnidisdioicae	GCA_900009975.1	Microbotryum_violaceum	GCA_900015455.1
Microbotryum	Microbotryum_lychnidisdioicae	GCA_900009975.1	Microbotryum_violaceum	GCA_900011735.1
Microbotryum	Microbotryum_lychnidisdioicae	GCA_900011535.1	Microbotryum_violaceum	GCA_900009495.1
Microbotryum	Microbotryum_lychnidisdioicae	GCA_900011535.1	Microbotryum_violaceum	GCA_900015435.1
Microbotryum	Microbotryum_lychnidisdioicae	GCA_900011535.1	Microbotryum_violaceum	GCA_900015965.1
Microbotryum	Microbotryum_lychnidisdioicae	GCA_900011535.1	Microbotryum_violaceum	GCA_900015425.1
Microbotryum	Microbotryum_lychnidisdioicae	GCA_900011535.1	Microbotryum_violaceum	GCA_900015455.1
Microbotryum	Microbotryum_lychnidisdioicae	GCA_900011535.1	Microbotryum_violaceum	GCA_900011735.1
Microbotryum	Microbotryum_lychnidisdioicae	GCA_900010545.1	Microbotryum_violaceum	GCA_900009495.1
Microbotryum	Microbotryum_lychnidisdioicae	GCA_900010545.1	Microbotryum_violaceum	GCA_900015435.1
Microbotryum	Microbotryum_lychnidisdioicae	GCA_900010545.1	Microbotryum_violaceum	GCA_900015965.1
Microbotryum	Microbotryum_lychnidisdioicae	GCA_900010545.1	Microbotryum_violaceum	GCA_900015425.1
Microbotryum	Microbotryum_lychnidisdioicae	GCA_900010545.1	Microbotryum_violaceum	GCA_900015455.1
Microbotryum	Microbotryum_lychnidisdioicae	GCA_900010545.1	Microbotryum_violaceum	GCA_900011735.1
Microbotryum	Microbotryum_lychnidisdioicae	GCA_900016695.1	Microbotryum_saponariae	GCA_900015475.1
Microbotryum	Microbotryum_lychnidisdioicae	GCA_900016695.1	Microbotryum_saponariae	GCA_900100905.1
Microbotryum	Microbotryum_lychnidisdioicae	GCA_900016695.1	Microbotryum_saponariae	GCA_900102585.1
Microbotryum	Microbotryum_lychnidisdioicae	GCA_900016695.1	Microbotryum_saponariae	GCA_900015975.1
Mucor	Rhizopus_oryzae	GCA_000697725.1	Rhizopus_delemar	GCA_000149305.1
Mucor	Rhizopus_oryzae	GCA_000697725.1	Rhizopus_delemar	GCA_000697155.1
Mucor	Rhizopus_oryzae	GCA_000697725.1	Rhizopus_delemar	GCA_000738595.1
Mucor	Rhizopus_oryzae	GCA_000696915.1	Rhizopus_delemar	GCA_000149305.1
Mucor	Rhizopus_oryzae	GCA_000696915.1	Rhizopus_delemar	GCA_000697155.1
Mucor	Rhizopus_oryzae	GCA_000697115.1	Rhizopus_delemar	GCA_000149305.1
Mucor	Rhizopus_oryzae	GCA_000697115.1	Rhizopus_delemar	GCA_000697155.1
Mucor	Rhizopus_oryzae	GCA_000697115.1	Rhizopus_delemar	GCA_000738595.1
Mucor	Rhizopus_oryzae	GCA_000697115.1	Rhizopus_delemar	GCA_000738605.1
Mucor	Rhizopus_oryzae	GCA_000697195.1	Rhizopus_delemar	GCA_000149305.1
Mucor	Rhizopus_oryzae	GCA_000697195.1	Rhizopus_delemar	GCA_000697155.1
Mucor	Rhizopus_oryzae	GCA_000697075.1	Rhizopus_delemar	GCA_000149305.1
Mucor	Rhizopus_oryzae	GCA_000697075.1	Rhizopus_delemar	GCA_000697155.1
Mucor	Rhizopus_oryzae	GCA_000697075.1	Rhizopus_delemar	GCA_000738595.1
Mucor	Rhizopus_oryzae	GCA_000697135.1	Rhizopus_delemar	GCA_000149305.1
Mucor	Rhizopus_oryzae	GCA_000697135.1	Rhizopus_delemar	GCA_000697155.1
Neurospora	Neurospora_sp_CHS2018a	GCA_009802535.1	Neurospora_sp_CHS2018b	GCA_009802905.1
Neurospora	Neurospora_sp_CHS2018a	GCA_009802535.1	Neurospora_sp_CHS2018b	GCA_009802575.1
Neurospora	Neurospora_sp_CHS2018a	GCA_009802535.1	Neurospora_sp_CHS2018b	GCA_009806255.1
Neurospora	Neurospora_sp_CHS2018a	GCA_009802535.1	Neurospora_sp_CHS2018b	GCA_009801745.1
Neurospora	Neurospora_sp_CHS2018a	GCA_009802535.1	Neurospora_sp_CHS2018b	GCA_009804405.1
Neurospora	Neurospora_sp_CHS2018a	GCA_009802535.1	Neurospora_sp_CHS2018b	GCA_009801395.1
Neurospora	Neurospora_sp_CHS2018a	GCA_009802535.1	Neurospora_sp_CHS2018b	GCA_009806015.1
Neurospora	Neurospora_sp_CHS2018a	GCA_009802535.1	Neurospora_sp_CHS2018b	GCA_009801765.1
Neurospora	Neurospora_sp_CHS2018a	GCA_009802535.1	Neurospora_sp_CHS2018b	GCA_009801725.1
Neurospora	Neurospora_sp_CHS2018a	GCA_009802535.1	Neurospora_sp_CHS2018b	GCA_009803155.1
Neurospora	Neurospora_sp_CHS2018a	GCA_009802535.1	Neurospora_sp_CHS2018c	GCA_009802055.1
Neurospora	Neurospora_sp_CHS2018a	GCA_009802535.1	Neurospora_sp_CHS2018c	GCA_009801555.1
Neurospora	Neurospora_sp_CHS2018a	GCA_009802535.1	Neurospora_sp_CHS2018c	GCA_009804285.1
Neurospora	Neurospora_sp_CHS2018a	GCA_009802535.1	Neurospora_sp_CHS2018c	GCA_009801275.1
Neurospora	Neurospora_sp_CHS2018a	GCA_009802535.1	Neurospora_sp_CHS2018c	GCA_009804295.1
Neurospora	Neurospora_sp_CHS2018a	GCA_009802535.1	Neurospora_sp_CHS2018c	GCA_009803505.1
Neurospora	Neurospora_sp_CHS2018a	GCA_009802535.1	Neurospora_sp_CHS2018c	GCA_009801215.1
Neurospora	Neurospora_sp_CHS2018a	GCA_009802535.1	Neurospora_sp_CHS2018c	GCA_009801535.1
Neurospora	Neurospora_sp_CHS2018a	GCA_009802535.1	Neurospora_sp_CHS2018c	GCA_009801505.1
Neurospora	Neurospora_sp_CHS2018a	GCA_009802535.1	Neurospora_sp_CHS2018c	GCA_009804305.1
Neurospora	Neurospora_sp_CHS2018a	GCA_009802275.1	Neurospora_sp_CHS2018b	GCA_009802905.1
Neurospora	Neurospora_sp_CHS2018a	GCA_009802275.1	Neurospora_sp_CHS2018b	GCA_009802575.1
Neurospora	Neurospora_sp_CHS2018a	GCA_009802275.1	Neurospora_sp_CHS2018b	GCA_009806255.1
Neurospora	Neurospora_sp_CHS2018a	GCA_009802275.1	Neurospora_sp_CHS2018b	GCA_009801745.1
Neurospora	Neurospora_sp_CHS2018a	GCA_009802275.1	Neurospora_sp_CHS2018b	GCA_009804405.1
Neurospora	Neurospora_sp_CHS2018a	GCA_009802275.1	Neurospora_sp_CHS2018b	GCA_009801395.1
Neurospora	Neurospora_sp_CHS2018a	GCA_009802275.1	Neurospora_sp_CHS2018b	GCA_009806015.1
Neurospora	Neurospora_sp_CHS2018a	GCA_009802275.1	Neurospora_sp_CHS2018b	GCA_009801765.1
Neurospora	Neurospora_sp_CHS2018a	GCA_009802275.1	Neurospora_sp_CHS2018b	GCA_009801725.1
Neurospora	Neurospora_sp_CHS2018a	GCA_009802275.1	Neurospora_sp_CHS2018b	GCA_009803155.1
Neurospora	Neurospora_sp_CHS2018a	GCA_009802275.1	Neurospora_sp_CHS2018c	GCA_009802055.1
Neurospora	Neurospora_sp_CHS2018a	GCA_009802275.1	Neurospora_sp_CHS2018c	GCA_009801555.1
Neurospora	Neurospora_sp_CHS2018a	GCA_009802275.1	Neurospora_sp_CHS2018c	GCA_009804285.1
Neurospora	Neurospora_sp_CHS2018a	GCA_009802275.1	Neurospora_sp_CHS2018c	GCA_009801275.1
Neurospora	Neurospora_sp_CHS2018a	GCA_009802275.1	Neurospora_sp_CHS2018c	GCA_009804295.1
Neurospora	Neurospora_sp_CHS2018a	GCA_009802275.1	Neurospora_sp_CHS2018c	GCA_009803505.1
Neurospora	Neurospora_sp_CHS2018a	GCA_009802275.1	Neurospora_sp_CHS2018c	GCA_009801215.1
Neurospora	Neurospora_sp_CHS2018a	GCA_009802275.1	Neurospora_sp_CHS2018c	GCA_009801535.1
Neurospora	Neurospora_sp_CHS2018a	GCA_009802275.1	Neurospora_sp_CHS2018c	GCA_009801505.1
Neurospora	Neurospora_sp_CHS2018a	GCA_009802275.1	Neurospora_sp_CHS2018c	GCA_009804305.1
Neurospora	Neurospora_sp_CHS2018a	GCA_009801875.1	Neurospora_sp_CHS2018b	GCA_009802905.1
Neurospora	Neurospora_sp_CHS2018a	GCA_009801875.1	Neurospora_sp_CHS2018b	GCA_009802575.1
Neurospora	Neurospora_sp_CHS2018a	GCA_009801875.1	Neurospora_sp_CHS2018b	GCA_009806255.1
Neurospora	Neurospora_sp_CHS2018a	GCA_009801875.1	Neurospora_sp_CHS2018b	GCA_009801745.1
Neurospora	Neurospora_sp_CHS2018a	GCA_009801875.1	Neurospora_sp_CHS2018b	GCA_009804405.1
Neurospora	Neurospora_sp_CHS2018a	GCA_009801875.1	Neurospora_sp_CHS2018b	GCA_009801395.1
Neurospora	Neurospora_sp_CHS2018a	GCA_009801875.1	Neurospora_sp_CHS2018b	GCA_009806015.1
Neurospora	Neurospora_sp_CHS2018a	GCA_009801875.1	Neurospora_sp_CHS2018b	GCA_009801765.1
Neurospora	Neurospora_sp_CHS2018a	GCA_009801875.1	Neurospora_sp_CHS2018b	GCA_009801725.1
Neurospora	Neurospora_sp_CHS2018a	GCA_009801875.1	Neurospora_sp_CHS2018b	GCA_009803155.1
Neurospora	Neurospora_sp_CHS2018a	GCA_009801875.1	Neurospora_sp_CHS2018c	GCA_009802055.1
Neurospora	Neurospora_sp_CHS2018a	GCA_009801875.1	Neurospora_sp_CHS2018c	GCA_009801555.1
Neurospora	Neurospora_sp_CHS2018a	GCA_009801875.1	Neurospora_sp_CHS2018c	GCA_009804285.1
Neurospora	Neurospora_sp_CHS2018a	GCA_009801875.1	Neurospora_sp_CHS2018c	GCA_009801275.1
Neurospora	Neurospora_sp_CHS2018a	GCA_009801875.1	Neurospora_sp_CHS2018c	GCA_009804295.1
Neurospora	Neurospora_sp_CHS2018a	GCA_009801875.1	Neurospora_sp_CHS2018c	GCA_009803505.1
Neurospora	Neurospora_sp_CHS2018a	GCA_009801875.1	Neurospora_sp_CHS2018c	GCA_009801215.1
Neurospora	Neurospora_sp_CHS2018a	GCA_009801875.1	Neurospora_sp_CHS2018c	GCA_009801535.1
Neurospora	Neurospora_sp_CHS2018a	GCA_009801875.1	Neurospora_sp_CHS2018c	GCA_009801505.1
Neurospora	Neurospora_sp_CHS2018a	GCA_009801875.1	Neurospora_sp_CHS2018c	GCA_009804305.1
Neurospora	Neurospora_sp_CHS2018a	GCA_009802515.1	Neurospora_sp_CHS2018b	GCA_009802905.1
Neurospora	Neurospora_sp_CHS2018a	GCA_009802515.1	Neurospora_sp_CHS2018b	GCA_009802575.1
Neurospora	Neurospora_sp_CHS2018a	GCA_009802515.1	Neurospora_sp_CHS2018b	GCA_009806255.1
Neurospora	Neurospora_sp_CHS2018a	GCA_009802515.1	Neurospora_sp_CHS2018b	GCA_009801745.1
Neurospora	Neurospora_sp_CHS2018a	GCA_009802515.1	Neurospora_sp_CHS2018b	GCA_009804405.1
Neurospora	Neurospora_sp_CHS2018a	GCA_009802515.1	Neurospora_sp_CHS2018b	GCA_009801395.1
Neurospora	Neurospora_sp_CHS2018a	GCA_009802515.1	Neurospora_sp_CHS2018b	GCA_009806015.1
Neurospora	Neurospora_sp_CHS2018a	GCA_009802515.1	Neurospora_sp_CHS2018b	GCA_009801765.1
Neurospora	Neurospora_sp_CHS2018a	GCA_009802515.1	Neurospora_sp_CHS2018b	GCA_009801725.1
Neurospora	Neurospora_sp_CHS2018a	GCA_009802515.1	Neurospora_sp_CHS2018b	GCA_009803155.1
Neurospora	Neurospora_sp_CHS2018a	GCA_009802515.1	Neurospora_sp_CHS2018c	GCA_009802055.1
Neurospora	Neurospora_sp_CHS2018a	GCA_009802515.1	Neurospora_sp_CHS2018c	GCA_009801555.1
Neurospora	Neurospora_sp_CHS2018a	GCA_009802515.1	Neurospora_sp_CHS2018c	GCA_009804285.1
Neurospora	Neurospora_sp_CHS2018a	GCA_009802515.1	Neurospora_sp_CHS2018c	GCA_009801275.1
Neurospora	Neurospora_sp_CHS2018a	GCA_009802515.1	Neurospora_sp_CHS2018c	GCA_009804295.1
Neurospora	Neurospora_sp_CHS2018a	GCA_009802515.1	Neurospora_sp_CHS2018c	GCA_009803505.1
Neurospora	Neurospora_sp_CHS2018a	GCA_009802515.1	Neurospora_sp_CHS2018c	GCA_009801215.1
Neurospora	Neurospora_sp_CHS2018a	GCA_009802515.1	Neurospora_sp_CHS2018c	GCA_009801535.1
Neurospora	Neurospora_sp_CHS2018a	GCA_009802515.1	Neurospora_sp_CHS2018c	GCA_009801505.1
Neurospora	Neurospora_sp_CHS2018a	GCA_009802515.1	Neurospora_sp_CHS2018c	GCA_009804305.1
Neurospora	Neurospora_sp_CHS2018a	GCA_009802215.1	Neurospora_sp_CHS2018b	GCA_009802905.1
Neurospora	Neurospora_sp_CHS2018a	GCA_009802215.1	Neurospora_sp_CHS2018b	GCA_009802575.1
Neurospora	Neurospora_sp_CHS2018a	GCA_009802215.1	Neurospora_sp_CHS2018b	GCA_009806255.1
Neurospora	Neurospora_sp_CHS2018a	GCA_009802215.1	Neurospora_sp_CHS2018b	GCA_009801745.1
Neurospora	Neurospora_sp_CHS2018a	GCA_009802215.1	Neurospora_sp_CHS2018b	GCA_009804405.1
Neurospora	Neurospora_sp_CHS2018a	GCA_009802215.1	Neurospora_sp_CHS2018b	GCA_009801395.1
Neurospora	Neurospora_sp_CHS2018a	GCA_009802215.1	Neurospora_sp_CHS2018b	GCA_009806015.1
Neurospora	Neurospora_sp_CHS2018a	GCA_009802215.1	Neurospora_sp_CHS2018b	GCA_009801765.1
Neurospora	Neurospora_sp_CHS2018a	GCA_009802215.1	Neurospora_sp_CHS2018b	GCA_009801725.1
Neurospora	Neurospora_sp_CHS2018a	GCA_009802215.1	Neurospora_sp_CHS2018b	GCA_009803155.1
Neurospora	Neurospora_sp_CHS2018a	GCA_009802215.1	Neurospora_sp_CHS2018c	GCA_009802055.1
Neurospora	Neurospora_sp_CHS2018a	GCA_009802215.1	Neurospora_sp_CHS2018c	GCA_009801555.1
Neurospora	Neurospora_sp_CHS2018a	GCA_009802215.1	Neurospora_sp_CHS2018c	GCA_009804285.1
Neurospora	Neurospora_sp_CHS2018a	GCA_009802215.1	Neurospora_sp_CHS2018c	GCA_009801275.1
Neurospora	Neurospora_sp_CHS2018a	GCA_009802215.1	Neurospora_sp_CHS2018c	GCA_009804295.1
Neurospora	Neurospora_sp_CHS2018a	GCA_009802215.1	Neurospora_sp_CHS2018c	GCA_009803505.1
Neurospora	Neurospora_sp_CHS2018a	GCA_009802215.1	Neurospora_sp_CHS2018c	GCA_009801215.1
Neurospora	Neurospora_sp_CHS2018a	GCA_009802215.1	Neurospora_sp_CHS2018c	GCA_009801535.1
Neurospora	Neurospora_sp_CHS2018a	GCA_009802215.1	Neurospora_sp_CHS2018c	GCA_009801505.1
Neurospora	Neurospora_sp_CHS2018a	GCA_009802215.1	Neurospora_sp_CHS2018c	GCA_009804305.1
Neurospora	Neurospora_sp_CHS2018a	GCA_009803175.1	Neurospora_sp_CHS2018b	GCA_009802905.1
Neurospora	Neurospora_sp_CHS2018a	GCA_009803175.1	Neurospora_sp_CHS2018b	GCA_009802575.1
Neurospora	Neurospora_sp_CHS2018a	GCA_009803175.1	Neurospora_sp_CHS2018b	GCA_009806255.1
Neurospora	Neurospora_sp_CHS2018a	GCA_009803175.1	Neurospora_sp_CHS2018b	GCA_009801745.1
Neurospora	Neurospora_sp_CHS2018a	GCA_009803175.1	Neurospora_sp_CHS2018b	GCA_009804405.1
Neurospora	Neurospora_sp_CHS2018a	GCA_009803175.1	Neurospora_sp_CHS2018b	GCA_009801395.1
Neurospora	Neurospora_sp_CHS2018a	GCA_009803175.1	Neurospora_sp_CHS2018b	GCA_009806015.1
Neurospora	Neurospora_sp_CHS2018a	GCA_009803175.1	Neurospora_sp_CHS2018b	GCA_009801765.1
Neurospora	Neurospora_sp_CHS2018a	GCA_009803175.1	Neurospora_sp_CHS2018b	GCA_009801725.1
Neurospora	Neurospora_sp_CHS2018a	GCA_009803175.1	Neurospora_sp_CHS2018b	GCA_009803155.1
Neurospora	Neurospora_sp_CHS2018a	GCA_009803175.1	Neurospora_sp_CHS2018c	GCA_009802055.1
Neurospora	Neurospora_sp_CHS2018a	GCA_009803175.1	Neurospora_sp_CHS2018c	GCA_009801555.1
Neurospora	Neurospora_sp_CHS2018a	GCA_009803175.1	Neurospora_sp_CHS2018c	GCA_009804285.1
Neurospora	Neurospora_sp_CHS2018a	GCA_009803175.1	Neurospora_sp_CHS2018c	GCA_009801275.1
Neurospora	Neurospora_sp_CHS2018a	GCA_009803175.1	Neurospora_sp_CHS2018c	GCA_009804295.1
Neurospora	Neurospora_sp_CHS2018a	GCA_009803175.1	Neurospora_sp_CHS2018c	GCA_009803505.1
Neurospora	Neurospora_sp_CHS2018a	GCA_009803175.1	Neurospora_sp_CHS2018c	GCA_009801215.1
Neurospora	Neurospora_sp_CHS2018a	GCA_009803175.1	Neurospora_sp_CHS2018c	GCA_009801535.1
Neurospora	Neurospora_sp_CHS2018a	GCA_009803175.1	Neurospora_sp_CHS2018c	GCA_009801505.1
Neurospora	Neurospora_sp_CHS2018a	GCA_009803175.1	Neurospora_sp_CHS2018c	GCA_009804305.1
Neurospora	Neurospora_sp_CHS2018a	GCA_009802235.1	Neurospora_sp_CHS2018b	GCA_009802905.1
Neurospora	Neurospora_sp_CHS2018a	GCA_009802235.1	Neurospora_sp_CHS2018b	GCA_009802575.1
Neurospora	Neurospora_sp_CHS2018a	GCA_009802235.1	Neurospora_sp_CHS2018b	GCA_009806255.1
Neurospora	Neurospora_sp_CHS2018a	GCA_009802235.1	Neurospora_sp_CHS2018b	GCA_009801745.1
Neurospora	Neurospora_sp_CHS2018a	GCA_009802235.1	Neurospora_sp_CHS2018b	GCA_009804405.1
Neurospora	Neurospora_sp_CHS2018a	GCA_009802235.1	Neurospora_sp_CHS2018b	GCA_009801395.1
Neurospora	Neurospora_sp_CHS2018a	GCA_009802235.1	Neurospora_sp_CHS2018b	GCA_009806015.1
Neurospora	Neurospora_sp_CHS2018a	GCA_009802235.1	Neurospora_sp_CHS2018b	GCA_009801765.1
Neurospora	Neurospora_sp_CHS2018a	GCA_009802235.1	Neurospora_sp_CHS2018b	GCA_009801725.1
Neurospora	Neurospora_sp_CHS2018a	GCA_009802235.1	Neurospora_sp_CHS2018b	GCA_009803155.1
Neurospora	Neurospora_sp_CHS2018a	GCA_009802235.1	Neurospora_sp_CHS2018c	GCA_009802055.1
Neurospora	Neurospora_sp_CHS2018a	GCA_009802235.1	Neurospora_sp_CHS2018c	GCA_009801555.1
Neurospora	Neurospora_sp_CHS2018a	GCA_009802235.1	Neurospora_sp_CHS2018c	GCA_009804285.1
Neurospora	Neurospora_sp_CHS2018a	GCA_009802235.1	Neurospora_sp_CHS2018c	GCA_009801275.1
Neurospora	Neurospora_sp_CHS2018a	GCA_009802235.1	Neurospora_sp_CHS2018c	GCA_009804295.1
Neurospora	Neurospora_sp_CHS2018a	GCA_009802235.1	Neurospora_sp_CHS2018c	GCA_009803505.1
Neurospora	Neurospora_sp_CHS2018a	GCA_009802235.1	Neurospora_sp_CHS2018c	GCA_009801215.1
Neurospora	Neurospora_sp_CHS2018a	GCA_009802235.1	Neurospora_sp_CHS2018c	GCA_009801535.1
Neurospora	Neurospora_sp_CHS2018a	GCA_009802235.1	Neurospora_sp_CHS2018c	GCA_009801505.1
Neurospora	Neurospora_sp_CHS2018a	GCA_009802235.1	Neurospora_sp_CHS2018c	GCA_009804305.1
Neurospora	Neurospora_sp_CHS2018a	GCA_009802265.1	Neurospora_sp_CHS2018b	GCA_009802905.1
Neurospora	Neurospora_sp_CHS2018a	GCA_009802265.1	Neurospora_sp_CHS2018b	GCA_009802575.1
Neurospora	Neurospora_sp_CHS2018a	GCA_009802265.1	Neurospora_sp_CHS2018b	GCA_009806255.1
Neurospora	Neurospora_sp_CHS2018a	GCA_009802265.1	Neurospora_sp_CHS2018b	GCA_009801745.1
Neurospora	Neurospora_sp_CHS2018a	GCA_009802265.1	Neurospora_sp_CHS2018b	GCA_009804405.1
Neurospora	Neurospora_sp_CHS2018a	GCA_009802265.1	Neurospora_sp_CHS2018b	GCA_009801395.1
Neurospora	Neurospora_sp_CHS2018a	GCA_009802265.1	Neurospora_sp_CHS2018b	GCA_009806015.1
Neurospora	Neurospora_sp_CHS2018a	GCA_009802265.1	Neurospora_sp_CHS2018b	GCA_009801765.1
Neurospora	Neurospora_sp_CHS2018a	GCA_009802265.1	Neurospora_sp_CHS2018b	GCA_009801725.1
Neurospora	Neurospora_sp_CHS2018a	GCA_009802265.1	Neurospora_sp_CHS2018b	GCA_009803155.1
Neurospora	Neurospora_sp_CHS2018a	GCA_009802265.1	Neurospora_sp_CHS2018c	GCA_009802055.1
Neurospora	Neurospora_sp_CHS2018a	GCA_009802265.1	Neurospora_sp_CHS2018c	GCA_009801555.1
Neurospora	Neurospora_sp_CHS2018a	GCA_009802265.1	Neurospora_sp_CHS2018c	GCA_009804285.1
Neurospora	Neurospora_sp_CHS2018a	GCA_009802265.1	Neurospora_sp_CHS2018c	GCA_009801275.1
Neurospora	Neurospora_sp_CHS2018a	GCA_009802265.1	Neurospora_sp_CHS2018c	GCA_009804295.1
Neurospora	Neurospora_sp_CHS2018a	GCA_009802265.1	Neurospora_sp_CHS2018c	GCA_009803505.1
Neurospora	Neurospora_sp_CHS2018a	GCA_009802265.1	Neurospora_sp_CHS2018c	GCA_009801215.1
Neurospora	Neurospora_sp_CHS2018a	GCA_009802265.1	Neurospora_sp_CHS2018c	GCA_009801535.1
Neurospora	Neurospora_sp_CHS2018a	GCA_009802265.1	Neurospora_sp_CHS2018c	GCA_009801505.1
Neurospora	Neurospora_sp_CHS2018a	GCA_009802265.1	Neurospora_sp_CHS2018c	GCA_009804305.1
Neurospora	Neurospora_sp_CHS2018a	GCA_009802375.1	Neurospora_sp_CHS2018b	GCA_009802905.1
Neurospora	Neurospora_sp_CHS2018a	GCA_009802375.1	Neurospora_sp_CHS2018b	GCA_009802575.1
Neurospora	Neurospora_sp_CHS2018a	GCA_009802375.1	Neurospora_sp_CHS2018b	GCA_009806255.1
Neurospora	Neurospora_sp_CHS2018a	GCA_009802375.1	Neurospora_sp_CHS2018b	GCA_009801745.1
Neurospora	Neurospora_sp_CHS2018a	GCA_009802375.1	Neurospora_sp_CHS2018b	GCA_009804405.1
Neurospora	Neurospora_sp_CHS2018a	GCA_009802375.1	Neurospora_sp_CHS2018b	GCA_009801395.1
Neurospora	Neurospora_sp_CHS2018a	GCA_009802375.1	Neurospora_sp_CHS2018b	GCA_009806015.1
Neurospora	Neurospora_sp_CHS2018a	GCA_009802375.1	Neurospora_sp_CHS2018b	GCA_009801765.1
Neurospora	Neurospora_sp_CHS2018a	GCA_009802375.1	Neurospora_sp_CHS2018b	GCA_009801725.1
Neurospora	Neurospora_sp_CHS2018a	GCA_009802375.1	Neurospora_sp_CHS2018b	GCA_009803155.1
Neurospora	Neurospora_sp_CHS2018a	GCA_009802375.1	Neurospora_sp_CHS2018c	GCA_009802055.1
Neurospora	Neurospora_sp_CHS2018a	GCA_009802375.1	Neurospora_sp_CHS2018c	GCA_009801555.1
Neurospora	Neurospora_sp_CHS2018a	GCA_009802375.1	Neurospora_sp_CHS2018c	GCA_009804285.1
Neurospora	Neurospora_sp_CHS2018a	GCA_009802375.1	Neurospora_sp_CHS2018c	GCA_009801275.1
Neurospora	Neurospora_sp_CHS2018a	GCA_009802375.1	Neurospora_sp_CHS2018c	GCA_009804295.1
Neurospora	Neurospora_sp_CHS2018a	GCA_009802375.1	Neurospora_sp_CHS2018c	GCA_009803505.1
Neurospora	Neurospora_sp_CHS2018a	GCA_009802375.1	Neurospora_sp_CHS2018c	GCA_009801215.1
Neurospora	Neurospora_sp_CHS2018a	GCA_009802375.1	Neurospora_sp_CHS2018c	GCA_009801535.1
Neurospora	Neurospora_sp_CHS2018a	GCA_009802375.1	Neurospora_sp_CHS2018c	GCA_009801505.1
Neurospora	Neurospora_sp_CHS2018a	GCA_009802375.1	Neurospora_sp_CHS2018c	GCA_009804305.1
Neurospora	Neurospora_sp_CHS2018a	GCA_009801945.1	Neurospora_sp_CHS2018b	GCA_009802905.1
Neurospora	Neurospora_sp_CHS2018a	GCA_009801945.1	Neurospora_sp_CHS2018b	GCA_009802575.1
Neurospora	Neurospora_sp_CHS2018a	GCA_009801945.1	Neurospora_sp_CHS2018b	GCA_009806255.1
Neurospora	Neurospora_sp_CHS2018a	GCA_009801945.1	Neurospora_sp_CHS2018b	GCA_009801745.1
Neurospora	Neurospora_sp_CHS2018a	GCA_009801945.1	Neurospora_sp_CHS2018b	GCA_009804405.1
Neurospora	Neurospora_sp_CHS2018a	GCA_009801945.1	Neurospora_sp_CHS2018b	GCA_009801395.1
Neurospora	Neurospora_sp_CHS2018a	GCA_009801945.1	Neurospora_sp_CHS2018b	GCA_009806015.1
Neurospora	Neurospora_sp_CHS2018a	GCA_009801945.1	Neurospora_sp_CHS2018b	GCA_009801765.1
Neurospora	Neurospora_sp_CHS2018a	GCA_009801945.1	Neurospora_sp_CHS2018b	GCA_009801725.1
Neurospora	Neurospora_sp_CHS2018a	GCA_009801945.1	Neurospora_sp_CHS2018b	GCA_009803155.1
Neurospora	Neurospora_sp_CHS2018a	GCA_009801945.1	Neurospora_sp_CHS2018c	GCA_009802055.1
Neurospora	Neurospora_sp_CHS2018a	GCA_009801945.1	Neurospora_sp_CHS2018c	GCA_009801555.1
Neurospora	Neurospora_sp_CHS2018a	GCA_009801945.1	Neurospora_sp_CHS2018c	GCA_009804285.1
Neurospora	Neurospora_sp_CHS2018a	GCA_009801945.1	Neurospora_sp_CHS2018c	GCA_009801275.1
Neurospora	Neurospora_sp_CHS2018a	GCA_009801945.1	Neurospora_sp_CHS2018c	GCA_009804295.1
Neurospora	Neurospora_sp_CHS2018a	GCA_009801945.1	Neurospora_sp_CHS2018c	GCA_009803505.1
Neurospora	Neurospora_sp_CHS2018a	GCA_009801945.1	Neurospora_sp_CHS2018c	GCA_009801215.1
Neurospora	Neurospora_sp_CHS2018a	GCA_009801945.1	Neurospora_sp_CHS2018c	GCA_009801535.1
Neurospora	Neurospora_sp_CHS2018a	GCA_009801945.1	Neurospora_sp_CHS2018c	GCA_009801505.1
Neurospora	Neurospora_sp_CHS2018a	GCA_009801945.1	Neurospora_sp_CHS2018c	GCA_009804305.1
Neurospora	Neurospora_sp_CHS2018b	GCA_009802905.1	Neurospora_sp_CHS2018c	GCA_009802055.1
Neurospora	Neurospora_sp_CHS2018b	GCA_009802905.1	Neurospora_sp_CHS2018c	GCA_009801555.1
Neurospora	Neurospora_sp_CHS2018b	GCA_009802905.1	Neurospora_sp_CHS2018c	GCA_009804285.1
Neurospora	Neurospora_sp_CHS2018b	GCA_009802905.1	Neurospora_sp_CHS2018c	GCA_009801275.1
Neurospora	Neurospora_sp_CHS2018b	GCA_009802905.1	Neurospora_sp_CHS2018c	GCA_009804295.1
Neurospora	Neurospora_sp_CHS2018b	GCA_009802905.1	Neurospora_sp_CHS2018c	GCA_009803505.1
Neurospora	Neurospora_sp_CHS2018b	GCA_009802905.1	Neurospora_sp_CHS2018c	GCA_009801215.1
Neurospora	Neurospora_sp_CHS2018b	GCA_009802905.1	Neurospora_sp_CHS2018c	GCA_009801535.1
Neurospora	Neurospora_sp_CHS2018b	GCA_009802905.1	Neurospora_sp_CHS2018c	GCA_009801505.1
Neurospora	Neurospora_sp_CHS2018b	GCA_009802905.1	Neurospora_sp_CHS2018c	GCA_009804305.1
Neurospora	Neurospora_sp_CHS2018b	GCA_009802575.1	Neurospora_sp_CHS2018c	GCA_009802055.1
Neurospora	Neurospora_sp_CHS2018b	GCA_009802575.1	Neurospora_sp_CHS2018c	GCA_009801555.1
Neurospora	Neurospora_sp_CHS2018b	GCA_009802575.1	Neurospora_sp_CHS2018c	GCA_009804285.1
Neurospora	Neurospora_sp_CHS2018b	GCA_009802575.1	Neurospora_sp_CHS2018c	GCA_009801275.1
Neurospora	Neurospora_sp_CHS2018b	GCA_009802575.1	Neurospora_sp_CHS2018c	GCA_009804295.1
Neurospora	Neurospora_sp_CHS2018b	GCA_009802575.1	Neurospora_sp_CHS2018c	GCA_009803505.1
Neurospora	Neurospora_sp_CHS2018b	GCA_009802575.1	Neurospora_sp_CHS2018c	GCA_009801215.1
Neurospora	Neurospora_sp_CHS2018b	GCA_009802575.1	Neurospora_sp_CHS2018c	GCA_009801535.1
Neurospora	Neurospora_sp_CHS2018b	GCA_009802575.1	Neurospora_sp_CHS2018c	GCA_009801505.1
Neurospora	Neurospora_sp_CHS2018b	GCA_009802575.1	Neurospora_sp_CHS2018c	GCA_009804305.1
Neurospora	Neurospora_sp_CHS2018b	GCA_009806255.1	Neurospora_sp_CHS2018c	GCA_009802055.1
Neurospora	Neurospora_sp_CHS2018b	GCA_009806255.1	Neurospora_sp_CHS2018c	GCA_009801555.1
Neurospora	Neurospora_sp_CHS2018b	GCA_009806255.1	Neurospora_sp_CHS2018c	GCA_009804285.1
Neurospora	Neurospora_sp_CHS2018b	GCA_009806255.1	Neurospora_sp_CHS2018c	GCA_009801275.1
Neurospora	Neurospora_sp_CHS2018b	GCA_009806255.1	Neurospora_sp_CHS2018c	GCA_009804295.1
Neurospora	Neurospora_sp_CHS2018b	GCA_009806255.1	Neurospora_sp_CHS2018c	GCA_009803505.1
Neurospora	Neurospora_sp_CHS2018b	GCA_009806255.1	Neurospora_sp_CHS2018c	GCA_009801215.1
Neurospora	Neurospora_sp_CHS2018b	GCA_009806255.1	Neurospora_sp_CHS2018c	GCA_009801535.1
Neurospora	Neurospora_sp_CHS2018b	GCA_009806255.1	Neurospora_sp_CHS2018c	GCA_009801505.1
Neurospora	Neurospora_sp_CHS2018b	GCA_009806255.1	Neurospora_sp_CHS2018c	GCA_009804305.1
Neurospora	Neurospora_sp_CHS2018b	GCA_009801745.1	Neurospora_sp_CHS2018c	GCA_009802055.1
Neurospora	Neurospora_sp_CHS2018b	GCA_009801745.1	Neurospora_sp_CHS2018c	GCA_009801555.1
Neurospora	Neurospora_sp_CHS2018b	GCA_009801745.1	Neurospora_sp_CHS2018c	GCA_009804285.1
Neurospora	Neurospora_sp_CHS2018b	GCA_009801745.1	Neurospora_sp_CHS2018c	GCA_009801275.1
Neurospora	Neurospora_sp_CHS2018b	GCA_009801745.1	Neurospora_sp_CHS2018c	GCA_009804295.1
Neurospora	Neurospora_sp_CHS2018b	GCA_009801745.1	Neurospora_sp_CHS2018c	GCA_009803505.1
Neurospora	Neurospora_sp_CHS2018b	GCA_009801745.1	Neurospora_sp_CHS2018c	GCA_009801215.1
Neurospora	Neurospora_sp_CHS2018b	GCA_009801745.1	Neurospora_sp_CHS2018c	GCA_009801535.1
Neurospora	Neurospora_sp_CHS2018b	GCA_009801745.1	Neurospora_sp_CHS2018c	GCA_009801505.1
Neurospora	Neurospora_sp_CHS2018b	GCA_009801745.1	Neurospora_sp_CHS2018c	GCA_009804305.1
Neurospora	Neurospora_sp_CHS2018b	GCA_009804405.1	Neurospora_sp_CHS2018c	GCA_009802055.1
Neurospora	Neurospora_sp_CHS2018b	GCA_009804405.1	Neurospora_sp_CHS2018c	GCA_009801555.1
Neurospora	Neurospora_sp_CHS2018b	GCA_009804405.1	Neurospora_sp_CHS2018c	GCA_009804285.1
Neurospora	Neurospora_sp_CHS2018b	GCA_009804405.1	Neurospora_sp_CHS2018c	GCA_009801275.1
Neurospora	Neurospora_sp_CHS2018b	GCA_009804405.1	Neurospora_sp_CHS2018c	GCA_009804295.1
Neurospora	Neurospora_sp_CHS2018b	GCA_009804405.1	Neurospora_sp_CHS2018c	GCA_009803505.1
Neurospora	Neurospora_sp_CHS2018b	GCA_009804405.1	Neurospora_sp_CHS2018c	GCA_009801215.1
Neurospora	Neurospora_sp_CHS2018b	GCA_009804405.1	Neurospora_sp_CHS2018c	GCA_009801535.1
Neurospora	Neurospora_sp_CHS2018b	GCA_009804405.1	Neurospora_sp_CHS2018c	GCA_009801505.1
Neurospora	Neurospora_sp_CHS2018b	GCA_009804405.1	Neurospora_sp_CHS2018c	GCA_009804305.1
Neurospora	Neurospora_sp_CHS2018b	GCA_009801395.1	Neurospora_sp_CHS2018c	GCA_009802055.1
Neurospora	Neurospora_sp_CHS2018b	GCA_009801395.1	Neurospora_sp_CHS2018c	GCA_009801555.1
Neurospora	Neurospora_sp_CHS2018b	GCA_009801395.1	Neurospora_sp_CHS2018c	GCA_009804285.1
Neurospora	Neurospora_sp_CHS2018b	GCA_009801395.1	Neurospora_sp_CHS2018c	GCA_009801275.1
Neurospora	Neurospora_sp_CHS2018b	GCA_009801395.1	Neurospora_sp_CHS2018c	GCA_009804295.1
Neurospora	Neurospora_sp_CHS2018b	GCA_009801395.1	Neurospora_sp_CHS2018c	GCA_009803505.1
Neurospora	Neurospora_sp_CHS2018b	GCA_009801395.1	Neurospora_sp_CHS2018c	GCA_009801215.1
Neurospora	Neurospora_sp_CHS2018b	GCA_009801395.1	Neurospora_sp_CHS2018c	GCA_009801535.1
Neurospora	Neurospora_sp_CHS2018b	GCA_009801395.1	Neurospora_sp_CHS2018c	GCA_009801505.1
Neurospora	Neurospora_sp_CHS2018b	GCA_009801395.1	Neurospora_sp_CHS2018c	GCA_009804305.1
Neurospora	Neurospora_sp_CHS2018b	GCA_009806015.1	Neurospora_sp_CHS2018c	GCA_009802055.1
Neurospora	Neurospora_sp_CHS2018b	GCA_009806015.1	Neurospora_sp_CHS2018c	GCA_009801555.1
Neurospora	Neurospora_sp_CHS2018b	GCA_009806015.1	Neurospora_sp_CHS2018c	GCA_009804285.1
Neurospora	Neurospora_sp_CHS2018b	GCA_009806015.1	Neurospora_sp_CHS2018c	GCA_009801275.1
Neurospora	Neurospora_sp_CHS2018b	GCA_009806015.1	Neurospora_sp_CHS2018c	GCA_009804295.1
Neurospora	Neurospora_sp_CHS2018b	GCA_009806015.1	Neurospora_sp_CHS2018c	GCA_009803505.1
Neurospora	Neurospora_sp_CHS2018b	GCA_009806015.1	Neurospora_sp_CHS2018c	GCA_009801215.1
Neurospora	Neurospora_sp_CHS2018b	GCA_009806015.1	Neurospora_sp_CHS2018c	GCA_009801535.1
Neurospora	Neurospora_sp_CHS2018b	GCA_009806015.1	Neurospora_sp_CHS2018c	GCA_009801505.1
Neurospora	Neurospora_sp_CHS2018b	GCA_009806015.1	Neurospora_sp_CHS2018c	GCA_009804305.1
Neurospora	Neurospora_sp_CHS2018b	GCA_009801765.1	Neurospora_sp_CHS2018c	GCA_009802055.1
Neurospora	Neurospora_sp_CHS2018b	GCA_009801765.1	Neurospora_sp_CHS2018c	GCA_009801555.1
Neurospora	Neurospora_sp_CHS2018b	GCA_009801765.1	Neurospora_sp_CHS2018c	GCA_009804285.1
Neurospora	Neurospora_sp_CHS2018b	GCA_009801765.1	Neurospora_sp_CHS2018c	GCA_009801275.1
Neurospora	Neurospora_sp_CHS2018b	GCA_009801765.1	Neurospora_sp_CHS2018c	GCA_009804295.1
Neurospora	Neurospora_sp_CHS2018b	GCA_009801765.1	Neurospora_sp_CHS2018c	GCA_009803505.1
Neurospora	Neurospora_sp_CHS2018b	GCA_009801765.1	Neurospora_sp_CHS2018c	GCA_009801215.1
Neurospora	Neurospora_sp_CHS2018b	GCA_009801765.1	Neurospora_sp_CHS2018c	GCA_009801535.1
Neurospora	Neurospora_sp_CHS2018b	GCA_009801765.1	Neurospora_sp_CHS2018c	GCA_009801505.1
Neurospora	Neurospora_sp_CHS2018b	GCA_009801765.1	Neurospora_sp_CHS2018c	GCA_009804305.1
Neurospora	Neurospora_sp_CHS2018b	GCA_009801725.1	Neurospora_sp_CHS2018c	GCA_009802055.1
Neurospora	Neurospora_sp_CHS2018b	GCA_009801725.1	Neurospora_sp_CHS2018c	GCA_009801555.1
Neurospora	Neurospora_sp_CHS2018b	GCA_009801725.1	Neurospora_sp_CHS2018c	GCA_009804285.1
Neurospora	Neurospora_sp_CHS2018b	GCA_009801725.1	Neurospora_sp_CHS2018c	GCA_009801275.1
Neurospora	Neurospora_sp_CHS2018b	GCA_009801725.1	Neurospora_sp_CHS2018c	GCA_009804295.1
Neurospora	Neurospora_sp_CHS2018b	GCA_009801725.1	Neurospora_sp_CHS2018c	GCA_009803505.1
Neurospora	Neurospora_sp_CHS2018b	GCA_009801725.1	Neurospora_sp_CHS2018c	GCA_009801215.1
Neurospora	Neurospora_sp_CHS2018b	GCA_009801725.1	Neurospora_sp_CHS2018c	GCA_009801535.1
Neurospora	Neurospora_sp_CHS2018b	GCA_009801725.1	Neurospora_sp_CHS2018c	GCA_009801505.1
Neurospora	Neurospora_sp_CHS2018b	GCA_009801725.1	Neurospora_sp_CHS2018c	GCA_009804305.1
Neurospora	Neurospora_sp_CHS2018b	GCA_009803155.1	Neurospora_sp_CHS2018c	GCA_009802055.1
Neurospora	Neurospora_sp_CHS2018b	GCA_009803155.1	Neurospora_sp_CHS2018c	GCA_009801555.1
Neurospora	Neurospora_sp_CHS2018b	GCA_009803155.1	Neurospora_sp_CHS2018c	GCA_009804285.1
Neurospora	Neurospora_sp_CHS2018b	GCA_009803155.1	Neurospora_sp_CHS2018c	GCA_009801275.1
Neurospora	Neurospora_sp_CHS2018b	GCA_009803155.1	Neurospora_sp_CHS2018c	GCA_009804295.1
Neurospora	Neurospora_sp_CHS2018b	GCA_009803155.1	Neurospora_sp_CHS2018c	GCA_009803505.1
Neurospora	Neurospora_sp_CHS2018b	GCA_009803155.1	Neurospora_sp_CHS2018c	GCA_009801215.1
Neurospora	Neurospora_sp_CHS2018b	GCA_009803155.1	Neurospora_sp_CHS2018c	GCA_009801535.1
Neurospora	Neurospora_sp_CHS2018b	GCA_009803155.1	Neurospora_sp_CHS2018c	GCA_009801505.1
Neurospora	Neurospora_sp_CHS2018b	GCA_009803155.1	Neurospora_sp_CHS2018c	GCA_009804305.1
Penicillium	Penicillium_expansum	GCA_002072455.1	Penicillium_oxalicum	GCA_004153425.1
Penicillium	Penicillium_expansum	GCA_002072455.1	Penicillium_oxalicum	GCA_005546515.1
Penicillium	Penicillium_expansum	GCA_002072455.1	Penicillium_oxalicum	GCA_000383025.1
Penicillium	Penicillium_expansum	GCA_002072455.1	Penicillium_oxalicum	GCA_000346795.1
Penicillium	Penicillium_expansum	GCA_002072455.1	Penicillium_oxalicum	GCA_001723175.2
Penicillium	Penicillium_expansum	GCA_002072455.1	Penicillium_oxalicum	GCA_004521935.1
Rhizopogon	Rhizopogon_rudus	GCA_002995175.1	Rhizopogon_sp_AM2018a	GCA_002995095.1
Rhizopogon	Rhizopogon_rudus	GCA_002995175.1	Rhizopogon_sp_AM2018a	GCA_002995235.1
Rhizopogon	Rhizopogon_rudus	GCA_002995355.1	Rhizopogon_sp_AM2018a	GCA_002995095.1
Rhizopogon	Rhizopogon_rudus	GCA_002995355.1	Rhizopogon_sp_AM2018a	GCA_002995235.1
Rhizopogon	Rhizopogon_rudus	GCA_002995055.1	Rhizopogon_sp_AM2018a	GCA_002995095.1
Rhizopogon	Rhizopogon_rudus	GCA_002995055.1	Rhizopogon_sp_AM2018a	GCA_002995235.1
Rhizopogon	Rhizopogon_rudus	GCA_002995195.1	Rhizopogon_sp_AM2018a	GCA_002995095.1
Rhizopogon	Rhizopogon_rudus	GCA_002995195.1	Rhizopogon_sp_AM2018a	GCA_002995235.1
Rhizopogon	Rhizopogon_rudus	GCA_002994895.1	Rhizopogon_sp_AM2018a	GCA_002995095.1
Rhizopogon	Rhizopogon_rudus	GCA_002994895.1	Rhizopogon_sp_AM2018a	GCA_002995235.1
Rhizopogon	Rhizopogon_rudus	GCA_002995335.1	Rhizopogon_sp_AM2018a	GCA_002995095.1
Rhizopogon	Rhizopogon_rudus	GCA_002995335.1	Rhizopogon_sp_AM2018a	GCA_002995235.1
Rhizopogon	Rhizopogon_rudus	GCA_002995215.1	Rhizopogon_sp_AM2018a	GCA_002995095.1
Rhizopogon	Rhizopogon_rudus	GCA_002995215.1	Rhizopogon_sp_AM2018a	GCA_002995235.1
Rhizopus	Rhizopus_oryzae	GCA_000697725.1	Rhizopus_delemar	GCA_000149305.1
Rhizopus	Rhizopus_oryzae	GCA_000697725.1	Rhizopus_delemar	GCA_000697155.1
Rhizopus	Rhizopus_oryzae	GCA_000697725.1	Rhizopus_delemar	GCA_000738595.1
Rhizopus	Rhizopus_oryzae	GCA_000696915.1	Rhizopus_delemar	GCA_000149305.1
Rhizopus	Rhizopus_oryzae	GCA_000696915.1	Rhizopus_delemar	GCA_000697155.1
Rhizopus	Rhizopus_oryzae	GCA_000697115.1	Rhizopus_delemar	GCA_000149305.1
Rhizopus	Rhizopus_oryzae	GCA_000697115.1	Rhizopus_delemar	GCA_000697155.1
Rhizopus	Rhizopus_oryzae	GCA_000697115.1	Rhizopus_delemar	GCA_000738595.1
Rhizopus	Rhizopus_oryzae	GCA_000697115.1	Rhizopus_delemar	GCA_000738605.1
Rhizopus	Rhizopus_oryzae	GCA_000697195.1	Rhizopus_delemar	GCA_000149305.1
Rhizopus	Rhizopus_oryzae	GCA_000697195.1	Rhizopus_delemar	GCA_000697155.1
Rhizopus	Rhizopus_oryzae	GCA_000697075.1	Rhizopus_delemar	GCA_000149305.1
Rhizopus	Rhizopus_oryzae	GCA_000697075.1	Rhizopus_delemar	GCA_000697155.1
Rhizopus	Rhizopus_oryzae	GCA_000697075.1	Rhizopus_delemar	GCA_000738595.1
Rhizopus	Rhizopus_oryzae	GCA_000697135.1	Rhizopus_delemar	GCA_000149305.1
Rhizopus	Rhizopus_oryzae	GCA_000697135.1	Rhizopus_delemar	GCA_000697155.1
Saccharomyces	Saccharomyces_eubayanus	GCA_001515405.2	Saccharomyces_cerevisiae_x_Saccharomyces_eubayanus	GCA_009666145.1
Saccharomyces	Saccharomyces_eubayanus	GCA_001515405.2	Saccharomyces_cerevisiae_x_Saccharomyces_eubayanus	GCA_009666095.1
Saccharomyces	Saccharomyces_eubayanus	GCA_001515405.2	Saccharomyces_cerevisiae_x_Saccharomyces_eubayanus	GCA_009667515.1
Saccharomyces	Saccharomyces_eubayanus	GCA_001515405.2	Saccharomyces_cerevisiae_x_Saccharomyces_eubayanus	GCA_009665555.1
Saccharomyces	Saccharomyces_eubayanus	GCA_001515405.2	Saccharomyces_cerevisiae_x_Saccharomyces_eubayanus	GCA_009666015.1
Saccharomyces	Saccharomyces_eubayanus	GCA_001515405.2	Saccharomyces_cerevisiae_x_Saccharomyces_eubayanus	GCA_009665685.1
Saccharomyces	Saccharomyces_eubayanus	GCA_001515405.2	Saccharomyces_cerevisiae_x_Saccharomyces_eubayanus	GCA_009667345.1
Saccharomyces	Saccharomyces_eubayanus	GCA_001515405.2	Saccharomyces_cerevisiae_x_Saccharomyces_eubayanus	GCA_009666185.1
Saccharomyces	Saccharomyces_eubayanus	GCA_001515405.2	Saccharomyces_cerevisiae_x_Saccharomyces_eubayanus	GCA_009665705.1
Saccharomyces	Saccharomyces_eubayanus	GCA_001515405.2	Saccharomyces_cerevisiae_x_Saccharomyces_eubayanus	GCA_009666635.1
Saccharomyces	Saccharomyces_eubayanus	GCA_001515405.2	Saccharomyces_eubayanus_x_Saccharomyces_uvarum	GCA_009667385.1
Saccharomyces	Saccharomyces_eubayanus	GCA_001515405.2	Saccharomyces_eubayanus_x_Saccharomyces_uvarum	GCA_009666765.1
Saccharomyces	Saccharomyces_eubayanus	GCA_001515405.2	Saccharomyces_eubayanus_x_Saccharomyces_uvarum	GCA_009666405.1
Saccharomyces	Saccharomyces_eubayanus	GCA_001515405.2	Saccharomyces_eubayanus_x_Saccharomyces_uvarum	GCA_009667275.1
Saccharomyces	Saccharomyces_eubayanus	GCA_001515405.2	Saccharomyces_eubayanus_x_Saccharomyces_uvarum	GCA_009666585.1
Saccharomyces	Saccharomyces_eubayanus	GCA_001515405.2	Saccharomyces_eubayanus_x_Saccharomyces_uvarum	GCA_009667145.1
Saccharomyces	Saccharomyces_eubayanus	GCA_001515405.2	Saccharomyces_eubayanus_x_Saccharomyces_uvarum	GCA_009666865.1
Saccharomyces	Saccharomyces_eubayanus	GCA_001515405.2	Saccharomyces_eubayanus_x_Saccharomyces_uvarum	GCA_009667075.1
Saccharomyces	Saccharomyces_eubayanus	GCA_001515405.2	Saccharomyces_pastorianus	GCA_001483335.1
Saccharomyces	Saccharomyces_eubayanus	GCA_001515405.2	Saccharomyces_pastorianus	GCA_001483345.1
Saccharomyces	Saccharomyces_eubayanus	GCA_001515405.2	Saccharomyces_pastorianus	GCA_000182115.1
Saccharomyces	Saccharomyces_eubayanus	GCA_001515405.2	Saccharomyces_pastorianus	GCA_002557695.1
Saccharomyces	Saccharomyces_eubayanus	GCA_001515405.2	Saccharomyces_pastorianus	GCA_000586535.1
Saccharomyces	Saccharomyces_eubayanus	GCA_001515405.2	Saccharomyces_pastorianus	GCA_001515445.2
Saccharomyces	Saccharomyces_eubayanus	GCA_001515405.2	Saccharomyces_pastorianus	GCA_001515485.2
Saccharomyces	Saccharomyces_eubayanus	GCA_001515405.2	Saccharomyces_pastorianus	GCA_011022315.1
Saccharomyces	Saccharomyces_eubayanus	GCA_001515405.2	Saccharomyces_pastorianus	GCA_000586595.1
Saccharomyces	Saccharomyces_eubayanus	GCA_001515405.2	Saccharomyces_cerevisiae_x_Saccharomyces_kudriavzevii	GCA_003004545.1
Saccharomyces	Saccharomyces_eubayanus	GCA_001298625.1	Saccharomyces_cerevisiae_x_Saccharomyces_eubayanus	GCA_009666145.1
Saccharomyces	Saccharomyces_eubayanus	GCA_001298625.1	Saccharomyces_cerevisiae_x_Saccharomyces_eubayanus	GCA_009666095.1
Saccharomyces	Saccharomyces_eubayanus	GCA_001298625.1	Saccharomyces_cerevisiae_x_Saccharomyces_eubayanus	GCA_009667515.1
Saccharomyces	Saccharomyces_eubayanus	GCA_001298625.1	Saccharomyces_cerevisiae_x_Saccharomyces_eubayanus	GCA_009665555.1
Saccharomyces	Saccharomyces_eubayanus	GCA_001298625.1	Saccharomyces_cerevisiae_x_Saccharomyces_eubayanus	GCA_009666015.1
Saccharomyces	Saccharomyces_eubayanus	GCA_001298625.1	Saccharomyces_cerevisiae_x_Saccharomyces_eubayanus	GCA_009665685.1
Saccharomyces	Saccharomyces_eubayanus	GCA_001298625.1	Saccharomyces_cerevisiae_x_Saccharomyces_eubayanus	GCA_009667345.1
Saccharomyces	Saccharomyces_eubayanus	GCA_001298625.1	Saccharomyces_cerevisiae_x_Saccharomyces_eubayanus	GCA_009666185.1
Saccharomyces	Saccharomyces_eubayanus	GCA_001298625.1	Saccharomyces_cerevisiae_x_Saccharomyces_eubayanus	GCA_009665705.1
Saccharomyces	Saccharomyces_eubayanus	GCA_001298625.1	Saccharomyces_cerevisiae_x_Saccharomyces_eubayanus	GCA_009666635.1
Saccharomyces	Saccharomyces_eubayanus	GCA_001298625.1	Saccharomyces_eubayanus_x_Saccharomyces_uvarum	GCA_009667385.1
Saccharomyces	Saccharomyces_eubayanus	GCA_001298625.1	Saccharomyces_eubayanus_x_Saccharomyces_uvarum	GCA_009666765.1
Saccharomyces	Saccharomyces_eubayanus	GCA_001298625.1	Saccharomyces_eubayanus_x_Saccharomyces_uvarum	GCA_009666405.1
Saccharomyces	Saccharomyces_eubayanus	GCA_001298625.1	Saccharomyces_eubayanus_x_Saccharomyces_uvarum	GCA_009667275.1
Saccharomyces	Saccharomyces_eubayanus	GCA_001298625.1	Saccharomyces_eubayanus_x_Saccharomyces_uvarum	GCA_009666585.1
Saccharomyces	Saccharomyces_eubayanus	GCA_001298625.1	Saccharomyces_eubayanus_x_Saccharomyces_uvarum	GCA_009667145.1
Saccharomyces	Saccharomyces_eubayanus	GCA_001298625.1	Saccharomyces_eubayanus_x_Saccharomyces_uvarum	GCA_009666865.1
Saccharomyces	Saccharomyces_eubayanus	GCA_001298625.1	Saccharomyces_eubayanus_x_Saccharomyces_uvarum	GCA_009667075.1
Saccharomyces	Saccharomyces_eubayanus	GCA_001298625.1	Saccharomyces_pastorianus	GCA_001483335.1
Saccharomyces	Saccharomyces_eubayanus	GCA_001298625.1	Saccharomyces_pastorianus	GCA_001483345.1
Saccharomyces	Saccharomyces_eubayanus	GCA_001298625.1	Saccharomyces_pastorianus	GCA_000182115.1
Saccharomyces	Saccharomyces_eubayanus	GCA_001298625.1	Saccharomyces_pastorianus	GCA_002557695.1
Saccharomyces	Saccharomyces_eubayanus	GCA_001298625.1	Saccharomyces_pastorianus	GCA_000586535.1
Saccharomyces	Saccharomyces_eubayanus	GCA_001298625.1	Saccharomyces_pastorianus	GCA_001515445.2
Saccharomyces	Saccharomyces_eubayanus	GCA_001298625.1	Saccharomyces_pastorianus	GCA_001515485.2
Saccharomyces	Saccharomyces_eubayanus	GCA_001298625.1	Saccharomyces_pastorianus	GCA_011022315.1
Saccharomyces	Saccharomyces_eubayanus	GCA_001298625.1	Saccharomyces_pastorianus	GCA_000586595.1
Saccharomyces	Saccharomyces_eubayanus	GCA_001298625.1	Saccharomyces_cerevisiae_x_Saccharomyces_kudriavzevii	GCA_003004545.1
Saccharomyces	Saccharomyces_eubayanus	GCA_003327605.1	Saccharomyces_cerevisiae_x_Saccharomyces_eubayanus	GCA_009666145.1
Saccharomyces	Saccharomyces_eubayanus	GCA_003327605.1	Saccharomyces_cerevisiae_x_Saccharomyces_eubayanus	GCA_009666095.1
Saccharomyces	Saccharomyces_eubayanus	GCA_003327605.1	Saccharomyces_cerevisiae_x_Saccharomyces_eubayanus	GCA_009667515.1
Saccharomyces	Saccharomyces_eubayanus	GCA_003327605.1	Saccharomyces_cerevisiae_x_Saccharomyces_eubayanus	GCA_009665555.1
Saccharomyces	Saccharomyces_eubayanus	GCA_003327605.1	Saccharomyces_cerevisiae_x_Saccharomyces_eubayanus	GCA_009666015.1
Saccharomyces	Saccharomyces_eubayanus	GCA_003327605.1	Saccharomyces_cerevisiae_x_Saccharomyces_eubayanus	GCA_009665685.1
Saccharomyces	Saccharomyces_eubayanus	GCA_003327605.1	Saccharomyces_cerevisiae_x_Saccharomyces_eubayanus	GCA_009667345.1
Saccharomyces	Saccharomyces_eubayanus	GCA_003327605.1	Saccharomyces_cerevisiae_x_Saccharomyces_eubayanus	GCA_009666185.1
Saccharomyces	Saccharomyces_eubayanus	GCA_003327605.1	Saccharomyces_cerevisiae_x_Saccharomyces_eubayanus	GCA_009665705.1
Saccharomyces	Saccharomyces_eubayanus	GCA_003327605.1	Saccharomyces_cerevisiae_x_Saccharomyces_eubayanus	GCA_009666635.1
Saccharomyces	Saccharomyces_eubayanus	GCA_003327605.1	Saccharomyces_eubayanus_x_Saccharomyces_uvarum	GCA_009667385.1
Saccharomyces	Saccharomyces_eubayanus	GCA_003327605.1	Saccharomyces_eubayanus_x_Saccharomyces_uvarum	GCA_009666765.1
Saccharomyces	Saccharomyces_eubayanus	GCA_003327605.1	Saccharomyces_eubayanus_x_Saccharomyces_uvarum	GCA_009666405.1
Saccharomyces	Saccharomyces_eubayanus	GCA_003327605.1	Saccharomyces_eubayanus_x_Saccharomyces_uvarum	GCA_009667275.1
Saccharomyces	Saccharomyces_eubayanus	GCA_003327605.1	Saccharomyces_eubayanus_x_Saccharomyces_uvarum	GCA_009666585.1
Saccharomyces	Saccharomyces_eubayanus	GCA_003327605.1	Saccharomyces_eubayanus_x_Saccharomyces_uvarum	GCA_009667145.1
Saccharomyces	Saccharomyces_eubayanus	GCA_003327605.1	Saccharomyces_eubayanus_x_Saccharomyces_uvarum	GCA_009666865.1
Saccharomyces	Saccharomyces_eubayanus	GCA_003327605.1	Saccharomyces_eubayanus_x_Saccharomyces_uvarum	GCA_009667075.1
Saccharomyces	Saccharomyces_eubayanus	GCA_003327605.1	Saccharomyces_pastorianus	GCA_001483335.1
Saccharomyces	Saccharomyces_eubayanus	GCA_003327605.1	Saccharomyces_pastorianus	GCA_001483345.1
Saccharomyces	Saccharomyces_eubayanus	GCA_003327605.1	Saccharomyces_pastorianus	GCA_000182115.1
Saccharomyces	Saccharomyces_eubayanus	GCA_003327605.1	Saccharomyces_pastorianus	GCA_002557695.1
Saccharomyces	Saccharomyces_eubayanus	GCA_003327605.1	Saccharomyces_pastorianus	GCA_000586535.1
Saccharomyces	Saccharomyces_eubayanus	GCA_003327605.1	Saccharomyces_pastorianus	GCA_001515445.2
Saccharomyces	Saccharomyces_eubayanus	GCA_003327605.1	Saccharomyces_pastorianus	GCA_001515485.2
Saccharomyces	Saccharomyces_eubayanus	GCA_003327605.1	Saccharomyces_pastorianus	GCA_011022315.1
Saccharomyces	Saccharomyces_eubayanus	GCA_003327605.1	Saccharomyces_pastorianus	GCA_000586595.1
Saccharomyces	Saccharomyces_eubayanus	GCA_003327605.1	Saccharomyces_cerevisiae_x_Saccharomyces_kudriavzevii	GCA_003004545.1
Saccharomyces	Saccharomyces_kudriavzevii	GCA_000257085.1	Saccharomyces_pastorianus	GCA_003004515.1
Saccharomyces	Saccharomyces_kudriavzevii	GCA_000257085.1	Saccharomyces_cerevisiae_x_Saccharomyces_kudriavzevii	GCA_000326105.1
Saccharomyces	Saccharomyces_kudriavzevii	GCA_000257045.1	Saccharomyces_pastorianus	GCA_003004515.1
Saccharomyces	Saccharomyces_kudriavzevii	GCA_000257045.1	Saccharomyces_cerevisiae_x_Saccharomyces_kudriavzevii	GCA_000326105.1
Saccharomyces	Saccharomyces_kudriavzevii	GCA_000257045.1	Saccharomyces_cerevisiae_x_Saccharomyces_kudriavzevii	GCA_009667415.1
Saccharomyces	Saccharomyces_kudriavzevii	GCA_000167075.2	Saccharomyces_pastorianus	GCA_003004515.1
Saccharomyces	Saccharomyces_kudriavzevii	GCA_000167075.2	Saccharomyces_cerevisiae_x_Saccharomyces_kudriavzevii	GCA_000326105.1
Saccharomyces	Saccharomyces_kudriavzevii	GCA_000167075.2	Saccharomyces_cerevisiae_x_Saccharomyces_kudriavzevii	GCA_009667415.1
Saccharomyces	Saccharomyces_kudriavzevii	GCA_900682695.1	Saccharomyces_cerevisiae_x_Saccharomyces_eubayanus_x_Saccharomyces_kudriavzevii_x_Saccharomyces_uvarum	GCA_009666875.1
Saccharomyces	Saccharomyces_kudriavzevii	GCA_900682695.1	Saccharomyces_pastorianus	GCA_003004515.1
Saccharomyces	Saccharomyces_kudriavzevii	GCA_900682695.1	Saccharomyces_cerevisiae_x_Saccharomyces_kudriavzevii	GCA_009665985.1
Saccharomyces	Saccharomyces_kudriavzevii	GCA_900682695.1	Saccharomyces_cerevisiae_x_Saccharomyces_kudriavzevii	GCA_000326105.1
Saccharomyces	Saccharomyces_kudriavzevii	GCA_900682695.1	Saccharomyces_cerevisiae_x_Saccharomyces_kudriavzevii	GCA_009667545.1
Saccharomyces	Saccharomyces_kudriavzevii	GCA_900682695.1	Saccharomyces_cerevisiae_x_Saccharomyces_kudriavzevii	GCA_009667415.1
Saccharomyces	Saccharomyces_kudriavzevii	GCA_900682695.1	Saccharomyces_cerevisiae_x_Saccharomyces_kudriavzevii	GCA_009665535.1
Saccharomyces	Saccharomyces_kudriavzevii	GCA_000257005.1	Saccharomyces_pastorianus	GCA_003004515.1
Saccharomyces	Saccharomyces_kudriavzevii	GCA_000257005.1	Saccharomyces_cerevisiae_x_Saccharomyces_kudriavzevii	GCA_000326105.1
Saccharomyces	Saccharomyces_cerevisiae_x_Saccharomyces_eubayanus	GCA_009666145.1	Saccharomyces_eubayanus_x_Saccharomyces_uvarum	GCA_009666765.1
Saccharomyces	Saccharomyces_cerevisiae_x_Saccharomyces_eubayanus	GCA_009666145.1	Saccharomyces_eubayanus_x_Saccharomyces_uvarum	GCA_009666405.1
Saccharomyces	Saccharomyces_cerevisiae_x_Saccharomyces_eubayanus	GCA_009666145.1	Saccharomyces_eubayanus_x_Saccharomyces_uvarum	GCA_009667275.1
Saccharomyces	Saccharomyces_cerevisiae_x_Saccharomyces_eubayanus	GCA_009666145.1	Saccharomyces_eubayanus_x_Saccharomyces_uvarum	GCA_009666585.1
Saccharomyces	Saccharomyces_cerevisiae_x_Saccharomyces_eubayanus	GCA_009666145.1	Saccharomyces_eubayanus_x_Saccharomyces_uvarum	GCA_009667145.1
Saccharomyces	Saccharomyces_cerevisiae_x_Saccharomyces_eubayanus	GCA_009666145.1	Saccharomyces_eubayanus_x_Saccharomyces_uvarum	GCA_009667075.1
Saccharomyces	Saccharomyces_cerevisiae_x_Saccharomyces_eubayanus	GCA_009666145.1	Saccharomyces_sp_boulardii	GCA_000769245.1
Saccharomyces	Saccharomyces_cerevisiae_x_Saccharomyces_eubayanus	GCA_009666145.1	Saccharomyces_sp_boulardii	GCA_001625055.1
Saccharomyces	Saccharomyces_cerevisiae_x_Saccharomyces_eubayanus	GCA_009666145.1	Saccharomyces_sp_boulardii	GCA_000442675.2
Saccharomyces	Saccharomyces_cerevisiae_x_Saccharomyces_eubayanus	GCA_009666145.1	Saccharomyces_sp_boulardii	GCA_001298375.2
Saccharomyces	Saccharomyces_cerevisiae_x_Saccharomyces_eubayanus	GCA_009666145.1	Saccharomyces_sp_boulardii	GCA_001413975.1
Saccharomyces	Saccharomyces_cerevisiae_x_Saccharomyces_eubayanus	GCA_009666145.1	Saccharomyces_sp_boulardii	GCA_001545905.1
Saccharomyces	Saccharomyces_cerevisiae_x_Saccharomyces_eubayanus	GCA_009666145.1	Saccharomyces_sp_boulardii	GCA_000734875.3
Saccharomyces	Saccharomyces_cerevisiae_x_Saccharomyces_eubayanus	GCA_009666145.1	Saccharomyces_sp_boulardii	GCA_001545975.1
Saccharomyces	Saccharomyces_cerevisiae_x_Saccharomyces_eubayanus	GCA_009666145.1	Saccharomyces_cerevisiae_x_Saccharomyces_eubayanus_x_Saccharomyces_kudriavzevii_x_Saccharomyces_uvarum	GCA_009667055.1
Saccharomyces	Saccharomyces_cerevisiae_x_Saccharomyces_eubayanus	GCA_009666145.1	Saccharomyces_cerevisiae_x_Saccharomyces_eubayanus_x_Saccharomyces_kudriavzevii_x_Saccharomyces_uvarum	GCA_009666875.1
Saccharomyces	Saccharomyces_cerevisiae_x_Saccharomyces_eubayanus	GCA_009666145.1	Saccharomyces_cerevisiae_x_Saccharomyces_eubayanus_x_Saccharomyces_kudriavzevii_x_Saccharomyces_uvarum	GCA_009666495.1
Saccharomyces	Saccharomyces_cerevisiae_x_Saccharomyces_eubayanus	GCA_009666145.1	Saccharomyces_pastorianus	GCA_001483335.1
Saccharomyces	Saccharomyces_cerevisiae_x_Saccharomyces_eubayanus	GCA_009666145.1	Saccharomyces_pastorianus	GCA_001483345.1
Saccharomyces	Saccharomyces_cerevisiae_x_Saccharomyces_eubayanus	GCA_009666145.1	Saccharomyces_pastorianus	GCA_000182115.1
Saccharomyces	Saccharomyces_cerevisiae_x_Saccharomyces_eubayanus	GCA_009666145.1	Saccharomyces_pastorianus	GCA_002557695.1
Saccharomyces	Saccharomyces_cerevisiae_x_Saccharomyces_eubayanus	GCA_009666145.1	Saccharomyces_pastorianus	GCA_000586535.1
Saccharomyces	Saccharomyces_cerevisiae_x_Saccharomyces_eubayanus	GCA_009666145.1	Saccharomyces_pastorianus	GCA_003004515.1
Saccharomyces	Saccharomyces_cerevisiae_x_Saccharomyces_eubayanus	GCA_009666145.1	Saccharomyces_pastorianus	GCA_001515445.2
Saccharomyces	Saccharomyces_cerevisiae_x_Saccharomyces_eubayanus	GCA_009666145.1	Saccharomyces_pastorianus	GCA_001515485.2
Saccharomyces	Saccharomyces_cerevisiae_x_Saccharomyces_eubayanus	GCA_009666145.1	Saccharomyces_pastorianus	GCA_011022315.1
Saccharomyces	Saccharomyces_cerevisiae_x_Saccharomyces_eubayanus	GCA_009666145.1	Saccharomyces_pastorianus	GCA_000586595.1
Saccharomyces	Saccharomyces_cerevisiae_x_Saccharomyces_eubayanus	GCA_009666145.1	Saccharomyces_cerevisiae_x_Saccharomyces_kudriavzevii	GCA_009665985.1
Saccharomyces	Saccharomyces_cerevisiae_x_Saccharomyces_eubayanus	GCA_009666145.1	Saccharomyces_cerevisiae_x_Saccharomyces_kudriavzevii	GCA_000326105.1
Saccharomyces	Saccharomyces_cerevisiae_x_Saccharomyces_eubayanus	GCA_009666145.1	Saccharomyces_cerevisiae_x_Saccharomyces_kudriavzevii	GCA_009667545.1
Saccharomyces	Saccharomyces_cerevisiae_x_Saccharomyces_eubayanus	GCA_009666145.1	Saccharomyces_cerevisiae_x_Saccharomyces_kudriavzevii	GCA_009666265.1
Saccharomyces	Saccharomyces_cerevisiae_x_Saccharomyces_eubayanus	GCA_009666145.1	Saccharomyces_cerevisiae_x_Saccharomyces_kudriavzevii	GCA_009667415.1
Saccharomyces	Saccharomyces_cerevisiae_x_Saccharomyces_eubayanus	GCA_009666145.1	Saccharomyces_cerevisiae_x_Saccharomyces_kudriavzevii	GCA_009665535.1
Saccharomyces	Saccharomyces_cerevisiae_x_Saccharomyces_eubayanus	GCA_009666145.1	Saccharomyces_cerevisiae_x_Saccharomyces_kudriavzevii	GCA_009665545.1
Saccharomyces	Saccharomyces_cerevisiae_x_Saccharomyces_eubayanus	GCA_009666145.1	Saccharomyces_cerevisiae_x_Saccharomyces_kudriavzevii	GCA_003004545.1
Saccharomyces	Saccharomyces_cerevisiae_x_Saccharomyces_eubayanus	GCA_009666145.1	Saccharomyces_cerevisiae	GCA_003273395.1
Saccharomyces	Saccharomyces_cerevisiae_x_Saccharomyces_eubayanus	GCA_009666145.1	Saccharomyces_cerevisiae	GCA_003274975.1
Saccharomyces	Saccharomyces_cerevisiae_x_Saccharomyces_eubayanus	GCA_009666145.1	Saccharomyces_cerevisiae	GCA_001739075.1
Saccharomyces	Saccharomyces_cerevisiae_x_Saccharomyces_eubayanus	GCA_009666145.1	Saccharomyces_cerevisiae	GCA_001741555.1
Saccharomyces	Saccharomyces_cerevisiae_x_Saccharomyces_eubayanus	GCA_009666145.1	Saccharomyces_cerevisiae	GCA_001671625.1
Saccharomyces	Saccharomyces_cerevisiae_x_Saccharomyces_eubayanus	GCA_009666145.1	Saccharomyces_cerevisiae	GCA_002250225.1
Saccharomyces	Saccharomyces_cerevisiae_x_Saccharomyces_eubayanus	GCA_009666145.1	Saccharomyces_cerevisiae	GCA_900178365.1
Saccharomyces	Saccharomyces_cerevisiae_x_Saccharomyces_eubayanus	GCA_009666145.1	Saccharomyces_cerevisiae	GCA_001741705.1
Saccharomyces	Saccharomyces_cerevisiae_x_Saccharomyces_eubayanus	GCA_009666145.1	Saccharomyces_cerevisiae	GCA_003272315.1
Saccharomyces	Saccharomyces_cerevisiae_x_Saccharomyces_eubayanus	GCA_009666145.1	Saccharomyces_cerevisiae	GCA_001739105.1
Saccharomyces	Saccharomyces_cerevisiae_x_Saccharomyces_eubayanus	GCA_009666095.1	Saccharomyces_eubayanus_x_Saccharomyces_uvarum	GCA_009666765.1
Saccharomyces	Saccharomyces_cerevisiae_x_Saccharomyces_eubayanus	GCA_009666095.1	Saccharomyces_eubayanus_x_Saccharomyces_uvarum	GCA_009666405.1
Saccharomyces	Saccharomyces_cerevisiae_x_Saccharomyces_eubayanus	GCA_009666095.1	Saccharomyces_eubayanus_x_Saccharomyces_uvarum	GCA_009667275.1
Saccharomyces	Saccharomyces_cerevisiae_x_Saccharomyces_eubayanus	GCA_009666095.1	Saccharomyces_eubayanus_x_Saccharomyces_uvarum	GCA_009666585.1
Saccharomyces	Saccharomyces_cerevisiae_x_Saccharomyces_eubayanus	GCA_009666095.1	Saccharomyces_eubayanus_x_Saccharomyces_uvarum	GCA_009667145.1
Saccharomyces	Saccharomyces_cerevisiae_x_Saccharomyces_eubayanus	GCA_009666095.1	Saccharomyces_eubayanus_x_Saccharomyces_uvarum	GCA_009667075.1
Saccharomyces	Saccharomyces_cerevisiae_x_Saccharomyces_eubayanus	GCA_009666095.1	Saccharomyces_sp_boulardii	GCA_000769245.1
Saccharomyces	Saccharomyces_cerevisiae_x_Saccharomyces_eubayanus	GCA_009666095.1	Saccharomyces_sp_boulardii	GCA_001625055.1
Saccharomyces	Saccharomyces_cerevisiae_x_Saccharomyces_eubayanus	GCA_009666095.1	Saccharomyces_sp_boulardii	GCA_000442675.2
Saccharomyces	Saccharomyces_cerevisiae_x_Saccharomyces_eubayanus	GCA_009666095.1	Saccharomyces_sp_boulardii	GCA_001298375.2
Saccharomyces	Saccharomyces_cerevisiae_x_Saccharomyces_eubayanus	GCA_009666095.1	Saccharomyces_sp_boulardii	GCA_001413975.1
Saccharomyces	Saccharomyces_cerevisiae_x_Saccharomyces_eubayanus	GCA_009666095.1	Saccharomyces_sp_boulardii	GCA_001545905.1
Saccharomyces	Saccharomyces_cerevisiae_x_Saccharomyces_eubayanus	GCA_009666095.1	Saccharomyces_sp_boulardii	GCA_000734875.3
Saccharomyces	Saccharomyces_cerevisiae_x_Saccharomyces_eubayanus	GCA_009666095.1	Saccharomyces_sp_boulardii	GCA_001545975.1
Saccharomyces	Saccharomyces_cerevisiae_x_Saccharomyces_eubayanus	GCA_009666095.1	Saccharomyces_cerevisiae_x_Saccharomyces_eubayanus_x_Saccharomyces_kudriavzevii_x_Saccharomyces_uvarum	GCA_009667055.1
Saccharomyces	Saccharomyces_cerevisiae_x_Saccharomyces_eubayanus	GCA_009666095.1	Saccharomyces_cerevisiae_x_Saccharomyces_eubayanus_x_Saccharomyces_kudriavzevii_x_Saccharomyces_uvarum	GCA_009666875.1
Saccharomyces	Saccharomyces_cerevisiae_x_Saccharomyces_eubayanus	GCA_009666095.1	Saccharomyces_cerevisiae_x_Saccharomyces_eubayanus_x_Saccharomyces_kudriavzevii_x_Saccharomyces_uvarum	GCA_009666495.1
Saccharomyces	Saccharomyces_cerevisiae_x_Saccharomyces_eubayanus	GCA_009666095.1	Saccharomyces_pastorianus	GCA_001483335.1
Saccharomyces	Saccharomyces_cerevisiae_x_Saccharomyces_eubayanus	GCA_009666095.1	Saccharomyces_pastorianus	GCA_001483345.1
Saccharomyces	Saccharomyces_cerevisiae_x_Saccharomyces_eubayanus	GCA_009666095.1	Saccharomyces_pastorianus	GCA_000182115.1
Saccharomyces	Saccharomyces_cerevisiae_x_Saccharomyces_eubayanus	GCA_009666095.1	Saccharomyces_pastorianus	GCA_002557695.1
Saccharomyces	Saccharomyces_cerevisiae_x_Saccharomyces_eubayanus	GCA_009666095.1	Saccharomyces_pastorianus	GCA_000586535.1
Saccharomyces	Saccharomyces_cerevisiae_x_Saccharomyces_eubayanus	GCA_009666095.1	Saccharomyces_pastorianus	GCA_003004515.1
Saccharomyces	Saccharomyces_cerevisiae_x_Saccharomyces_eubayanus	GCA_009666095.1	Saccharomyces_pastorianus	GCA_001515445.2
Saccharomyces	Saccharomyces_cerevisiae_x_Saccharomyces_eubayanus	GCA_009666095.1	Saccharomyces_pastorianus	GCA_001515485.2
Saccharomyces	Saccharomyces_cerevisiae_x_Saccharomyces_eubayanus	GCA_009666095.1	Saccharomyces_pastorianus	GCA_011022315.1
Saccharomyces	Saccharomyces_cerevisiae_x_Saccharomyces_eubayanus	GCA_009666095.1	Saccharomyces_pastorianus	GCA_000586595.1
Saccharomyces	Saccharomyces_cerevisiae_x_Saccharomyces_eubayanus	GCA_009666095.1	Saccharomyces_cerevisiae_x_Saccharomyces_kudriavzevii	GCA_009665985.1
Saccharomyces	Saccharomyces_cerevisiae_x_Saccharomyces_eubayanus	GCA_009666095.1	Saccharomyces_cerevisiae_x_Saccharomyces_kudriavzevii	GCA_000326105.1
Saccharomyces	Saccharomyces_cerevisiae_x_Saccharomyces_eubayanus	GCA_009666095.1	Saccharomyces_cerevisiae_x_Saccharomyces_kudriavzevii	GCA_009667545.1
Saccharomyces	Saccharomyces_cerevisiae_x_Saccharomyces_eubayanus	GCA_009666095.1	Saccharomyces_cerevisiae_x_Saccharomyces_kudriavzevii	GCA_009666265.1
Saccharomyces	Saccharomyces_cerevisiae_x_Saccharomyces_eubayanus	GCA_009666095.1	Saccharomyces_cerevisiae_x_Saccharomyces_kudriavzevii	GCA_009667415.1
Saccharomyces	Saccharomyces_cerevisiae_x_Saccharomyces_eubayanus	GCA_009666095.1	Saccharomyces_cerevisiae_x_Saccharomyces_kudriavzevii	GCA_009665535.1
Saccharomyces	Saccharomyces_cerevisiae_x_Saccharomyces_eubayanus	GCA_009666095.1	Saccharomyces_cerevisiae_x_Saccharomyces_kudriavzevii	GCA_009665545.1
Saccharomyces	Saccharomyces_cerevisiae_x_Saccharomyces_eubayanus	GCA_009666095.1	Saccharomyces_cerevisiae_x_Saccharomyces_kudriavzevii	GCA_003004545.1
Saccharomyces	Saccharomyces_cerevisiae_x_Saccharomyces_eubayanus	GCA_009666095.1	Saccharomyces_cerevisiae	GCA_003273395.1
Saccharomyces	Saccharomyces_cerevisiae_x_Saccharomyces_eubayanus	GCA_009666095.1	Saccharomyces_cerevisiae	GCA_003274975.1
Saccharomyces	Saccharomyces_cerevisiae_x_Saccharomyces_eubayanus	GCA_009666095.1	Saccharomyces_cerevisiae	GCA_001739075.1
Saccharomyces	Saccharomyces_cerevisiae_x_Saccharomyces_eubayanus	GCA_009666095.1	Saccharomyces_cerevisiae	GCA_001741555.1
Saccharomyces	Saccharomyces_cerevisiae_x_Saccharomyces_eubayanus	GCA_009666095.1	Saccharomyces_cerevisiae	GCA_001671625.1
Saccharomyces	Saccharomyces_cerevisiae_x_Saccharomyces_eubayanus	GCA_009666095.1	Saccharomyces_cerevisiae	GCA_002250225.1
Saccharomyces	Saccharomyces_cerevisiae_x_Saccharomyces_eubayanus	GCA_009666095.1	Saccharomyces_cerevisiae	GCA_900178365.1
Saccharomyces	Saccharomyces_cerevisiae_x_Saccharomyces_eubayanus	GCA_009666095.1	Saccharomyces_cerevisiae	GCA_001741705.1
Saccharomyces	Saccharomyces_cerevisiae_x_Saccharomyces_eubayanus	GCA_009666095.1	Saccharomyces_cerevisiae	GCA_003272315.1
Saccharomyces	Saccharomyces_cerevisiae_x_Saccharomyces_eubayanus	GCA_009666095.1	Saccharomyces_cerevisiae	GCA_001739105.1
Saccharomyces	Saccharomyces_cerevisiae_x_Saccharomyces_eubayanus	GCA_009667515.1	Saccharomyces_eubayanus_x_Saccharomyces_uvarum	GCA_009667385.1
Saccharomyces	Saccharomyces_cerevisiae_x_Saccharomyces_eubayanus	GCA_009667515.1	Saccharomyces_eubayanus_x_Saccharomyces_uvarum	GCA_009666765.1
Saccharomyces	Saccharomyces_cerevisiae_x_Saccharomyces_eubayanus	GCA_009667515.1	Saccharomyces_eubayanus_x_Saccharomyces_uvarum	GCA_009666405.1
Saccharomyces	Saccharomyces_cerevisiae_x_Saccharomyces_eubayanus	GCA_009667515.1	Saccharomyces_eubayanus_x_Saccharomyces_uvarum	GCA_009667275.1
Saccharomyces	Saccharomyces_cerevisiae_x_Saccharomyces_eubayanus	GCA_009667515.1	Saccharomyces_eubayanus_x_Saccharomyces_uvarum	GCA_009666585.1
Saccharomyces	Saccharomyces_cerevisiae_x_Saccharomyces_eubayanus	GCA_009667515.1	Saccharomyces_eubayanus_x_Saccharomyces_uvarum	GCA_009667145.1
Saccharomyces	Saccharomyces_cerevisiae_x_Saccharomyces_eubayanus	GCA_009667515.1	Saccharomyces_eubayanus_x_Saccharomyces_uvarum	GCA_009667075.1
Saccharomyces	Saccharomyces_cerevisiae_x_Saccharomyces_eubayanus	GCA_009667515.1	Saccharomyces_pastorianus	GCA_001483335.1
Saccharomyces	Saccharomyces_cerevisiae_x_Saccharomyces_eubayanus	GCA_009667515.1	Saccharomyces_pastorianus	GCA_001483345.1
Saccharomyces	Saccharomyces_cerevisiae_x_Saccharomyces_eubayanus	GCA_009667515.1	Saccharomyces_pastorianus	GCA_000182115.1
Saccharomyces	Saccharomyces_cerevisiae_x_Saccharomyces_eubayanus	GCA_009667515.1	Saccharomyces_pastorianus	GCA_002557695.1
Saccharomyces	Saccharomyces_cerevisiae_x_Saccharomyces_eubayanus	GCA_009667515.1	Saccharomyces_pastorianus	GCA_000586535.1
Saccharomyces	Saccharomyces_cerevisiae_x_Saccharomyces_eubayanus	GCA_009667515.1	Saccharomyces_pastorianus	GCA_001515445.2
Saccharomyces	Saccharomyces_cerevisiae_x_Saccharomyces_eubayanus	GCA_009667515.1	Saccharomyces_pastorianus	GCA_001515485.2
Saccharomyces	Saccharomyces_cerevisiae_x_Saccharomyces_eubayanus	GCA_009667515.1	Saccharomyces_pastorianus	GCA_011022315.1
Saccharomyces	Saccharomyces_cerevisiae_x_Saccharomyces_eubayanus	GCA_009667515.1	Saccharomyces_pastorianus	GCA_000586595.1
Saccharomyces	Saccharomyces_cerevisiae_x_Saccharomyces_eubayanus	GCA_009667515.1	Saccharomyces_cerevisiae_x_Saccharomyces_kudriavzevii	GCA_003004545.1
Saccharomyces	Saccharomyces_cerevisiae_x_Saccharomyces_eubayanus	GCA_009667515.1	Saccharomyces_cerevisiae	GCA_001741555.1
Saccharomyces	Saccharomyces_cerevisiae_x_Saccharomyces_eubayanus	GCA_009667515.1	Saccharomyces_cerevisiae	GCA_001739105.1
Saccharomyces	Saccharomyces_cerevisiae_x_Saccharomyces_eubayanus	GCA_009665555.1	Saccharomyces_eubayanus_x_Saccharomyces_uvarum	GCA_009666765.1
Saccharomyces	Saccharomyces_cerevisiae_x_Saccharomyces_eubayanus	GCA_009665555.1	Saccharomyces_eubayanus_x_Saccharomyces_uvarum	GCA_009666405.1
Saccharomyces	Saccharomyces_cerevisiae_x_Saccharomyces_eubayanus	GCA_009665555.1	Saccharomyces_eubayanus_x_Saccharomyces_uvarum	GCA_009667275.1
Saccharomyces	Saccharomyces_cerevisiae_x_Saccharomyces_eubayanus	GCA_009665555.1	Saccharomyces_eubayanus_x_Saccharomyces_uvarum	GCA_009666585.1
Saccharomyces	Saccharomyces_cerevisiae_x_Saccharomyces_eubayanus	GCA_009665555.1	Saccharomyces_eubayanus_x_Saccharomyces_uvarum	GCA_009667145.1
Saccharomyces	Saccharomyces_cerevisiae_x_Saccharomyces_eubayanus	GCA_009665555.1	Saccharomyces_eubayanus_x_Saccharomyces_uvarum	GCA_009667075.1
Saccharomyces	Saccharomyces_cerevisiae_x_Saccharomyces_eubayanus	GCA_009665555.1	Saccharomyces_sp_boulardii	GCA_000769245.1
Saccharomyces	Saccharomyces_cerevisiae_x_Saccharomyces_eubayanus	GCA_009665555.1	Saccharomyces_sp_boulardii	GCA_001625055.1
Saccharomyces	Saccharomyces_cerevisiae_x_Saccharomyces_eubayanus	GCA_009665555.1	Saccharomyces_sp_boulardii	GCA_000442675.2
Saccharomyces	Saccharomyces_cerevisiae_x_Saccharomyces_eubayanus	GCA_009665555.1	Saccharomyces_sp_boulardii	GCA_001298375.2
Saccharomyces	Saccharomyces_cerevisiae_x_Saccharomyces_eubayanus	GCA_009665555.1	Saccharomyces_sp_boulardii	GCA_001413975.1
Saccharomyces	Saccharomyces_cerevisiae_x_Saccharomyces_eubayanus	GCA_009665555.1	Saccharomyces_sp_boulardii	GCA_001545905.1
Saccharomyces	Saccharomyces_cerevisiae_x_Saccharomyces_eubayanus	GCA_009665555.1	Saccharomyces_sp_boulardii	GCA_000734875.3
Saccharomyces	Saccharomyces_cerevisiae_x_Saccharomyces_eubayanus	GCA_009665555.1	Saccharomyces_sp_boulardii	GCA_001545975.1
Saccharomyces	Saccharomyces_cerevisiae_x_Saccharomyces_eubayanus	GCA_009665555.1	Saccharomyces_cerevisiae_x_Saccharomyces_eubayanus_x_Saccharomyces_kudriavzevii_x_Saccharomyces_uvarum	GCA_009667055.1
Saccharomyces	Saccharomyces_cerevisiae_x_Saccharomyces_eubayanus	GCA_009665555.1	Saccharomyces_cerevisiae_x_Saccharomyces_eubayanus_x_Saccharomyces_kudriavzevii_x_Saccharomyces_uvarum	GCA_009666875.1
Saccharomyces	Saccharomyces_cerevisiae_x_Saccharomyces_eubayanus	GCA_009665555.1	Saccharomyces_cerevisiae_x_Saccharomyces_eubayanus_x_Saccharomyces_kudriavzevii_x_Saccharomyces_uvarum	GCA_009666495.1
Saccharomyces	Saccharomyces_cerevisiae_x_Saccharomyces_eubayanus	GCA_009665555.1	Saccharomyces_pastorianus	GCA_001483335.1
Saccharomyces	Saccharomyces_cerevisiae_x_Saccharomyces_eubayanus	GCA_009665555.1	Saccharomyces_pastorianus	GCA_001483345.1
Saccharomyces	Saccharomyces_cerevisiae_x_Saccharomyces_eubayanus	GCA_009665555.1	Saccharomyces_pastorianus	GCA_000182115.1
Saccharomyces	Saccharomyces_cerevisiae_x_Saccharomyces_eubayanus	GCA_009665555.1	Saccharomyces_pastorianus	GCA_002557695.1
Saccharomyces	Saccharomyces_cerevisiae_x_Saccharomyces_eubayanus	GCA_009665555.1	Saccharomyces_pastorianus	GCA_000586535.1
Saccharomyces	Saccharomyces_cerevisiae_x_Saccharomyces_eubayanus	GCA_009665555.1	Saccharomyces_pastorianus	GCA_003004515.1
Saccharomyces	Saccharomyces_cerevisiae_x_Saccharomyces_eubayanus	GCA_009665555.1	Saccharomyces_pastorianus	GCA_001515445.2
Saccharomyces	Saccharomyces_cerevisiae_x_Saccharomyces_eubayanus	GCA_009665555.1	Saccharomyces_pastorianus	GCA_001515485.2
Saccharomyces	Saccharomyces_cerevisiae_x_Saccharomyces_eubayanus	GCA_009665555.1	Saccharomyces_pastorianus	GCA_011022315.1
Saccharomyces	Saccharomyces_cerevisiae_x_Saccharomyces_eubayanus	GCA_009665555.1	Saccharomyces_pastorianus	GCA_000586595.1
Saccharomyces	Saccharomyces_cerevisiae_x_Saccharomyces_eubayanus	GCA_009665555.1	Saccharomyces_cerevisiae_x_Saccharomyces_kudriavzevii	GCA_009665985.1
Saccharomyces	Saccharomyces_cerevisiae_x_Saccharomyces_eubayanus	GCA_009665555.1	Saccharomyces_cerevisiae_x_Saccharomyces_kudriavzevii	GCA_000326105.1
Saccharomyces	Saccharomyces_cerevisiae_x_Saccharomyces_eubayanus	GCA_009665555.1	Saccharomyces_cerevisiae_x_Saccharomyces_kudriavzevii	GCA_009667545.1
Saccharomyces	Saccharomyces_cerevisiae_x_Saccharomyces_eubayanus	GCA_009665555.1	Saccharomyces_cerevisiae_x_Saccharomyces_kudriavzevii	GCA_009666265.1
Saccharomyces	Saccharomyces_cerevisiae_x_Saccharomyces_eubayanus	GCA_009665555.1	Saccharomyces_cerevisiae_x_Saccharomyces_kudriavzevii	GCA_009667415.1
Saccharomyces	Saccharomyces_cerevisiae_x_Saccharomyces_eubayanus	GCA_009665555.1	Saccharomyces_cerevisiae_x_Saccharomyces_kudriavzevii	GCA_009665535.1
Saccharomyces	Saccharomyces_cerevisiae_x_Saccharomyces_eubayanus	GCA_009665555.1	Saccharomyces_cerevisiae_x_Saccharomyces_kudriavzevii	GCA_009665545.1
Saccharomyces	Saccharomyces_cerevisiae_x_Saccharomyces_eubayanus	GCA_009665555.1	Saccharomyces_cerevisiae_x_Saccharomyces_kudriavzevii	GCA_003004545.1
Saccharomyces	Saccharomyces_cerevisiae_x_Saccharomyces_eubayanus	GCA_009665555.1	Saccharomyces_cerevisiae	GCA_003273395.1
Saccharomyces	Saccharomyces_cerevisiae_x_Saccharomyces_eubayanus	GCA_009665555.1	Saccharomyces_cerevisiae	GCA_003274975.1
Saccharomyces	Saccharomyces_cerevisiae_x_Saccharomyces_eubayanus	GCA_009665555.1	Saccharomyces_cerevisiae	GCA_001739075.1
Saccharomyces	Saccharomyces_cerevisiae_x_Saccharomyces_eubayanus	GCA_009665555.1	Saccharomyces_cerevisiae	GCA_001741555.1
Saccharomyces	Saccharomyces_cerevisiae_x_Saccharomyces_eubayanus	GCA_009665555.1	Saccharomyces_cerevisiae	GCA_001671625.1
Saccharomyces	Saccharomyces_cerevisiae_x_Saccharomyces_eubayanus	GCA_009665555.1	Saccharomyces_cerevisiae	GCA_002250225.1
Saccharomyces	Saccharomyces_cerevisiae_x_Saccharomyces_eubayanus	GCA_009665555.1	Saccharomyces_cerevisiae	GCA_900178365.1
Saccharomyces	Saccharomyces_cerevisiae_x_Saccharomyces_eubayanus	GCA_009665555.1	Saccharomyces_cerevisiae	GCA_001741705.1
Saccharomyces	Saccharomyces_cerevisiae_x_Saccharomyces_eubayanus	GCA_009665555.1	Saccharomyces_cerevisiae	GCA_003272315.1
Saccharomyces	Saccharomyces_cerevisiae_x_Saccharomyces_eubayanus	GCA_009665555.1	Saccharomyces_cerevisiae	GCA_001739105.1
Saccharomyces	Saccharomyces_cerevisiae_x_Saccharomyces_eubayanus	GCA_009666015.1	Saccharomyces_eubayanus_x_Saccharomyces_uvarum	GCA_009666765.1
Saccharomyces	Saccharomyces_cerevisiae_x_Saccharomyces_eubayanus	GCA_009666015.1	Saccharomyces_eubayanus_x_Saccharomyces_uvarum	GCA_009666405.1
Saccharomyces	Saccharomyces_cerevisiae_x_Saccharomyces_eubayanus	GCA_009666015.1	Saccharomyces_eubayanus_x_Saccharomyces_uvarum	GCA_009667275.1
Saccharomyces	Saccharomyces_cerevisiae_x_Saccharomyces_eubayanus	GCA_009666015.1	Saccharomyces_eubayanus_x_Saccharomyces_uvarum	GCA_009666585.1
Saccharomyces	Saccharomyces_cerevisiae_x_Saccharomyces_eubayanus	GCA_009666015.1	Saccharomyces_eubayanus_x_Saccharomyces_uvarum	GCA_009667145.1
Saccharomyces	Saccharomyces_cerevisiae_x_Saccharomyces_eubayanus	GCA_009666015.1	Saccharomyces_eubayanus_x_Saccharomyces_uvarum	GCA_009667075.1
Saccharomyces	Saccharomyces_cerevisiae_x_Saccharomyces_eubayanus	GCA_009666015.1	Saccharomyces_sp_boulardii	GCA_000769245.1
Saccharomyces	Saccharomyces_cerevisiae_x_Saccharomyces_eubayanus	GCA_009666015.1	Saccharomyces_sp_boulardii	GCA_001625055.1
Saccharomyces	Saccharomyces_cerevisiae_x_Saccharomyces_eubayanus	GCA_009666015.1	Saccharomyces_sp_boulardii	GCA_000442675.2
Saccharomyces	Saccharomyces_cerevisiae_x_Saccharomyces_eubayanus	GCA_009666015.1	Saccharomyces_sp_boulardii	GCA_001298375.2
Saccharomyces	Saccharomyces_cerevisiae_x_Saccharomyces_eubayanus	GCA_009666015.1	Saccharomyces_sp_boulardii	GCA_001413975.1
Saccharomyces	Saccharomyces_cerevisiae_x_Saccharomyces_eubayanus	GCA_009666015.1	Saccharomyces_sp_boulardii	GCA_001545905.1
Saccharomyces	Saccharomyces_cerevisiae_x_Saccharomyces_eubayanus	GCA_009666015.1	Saccharomyces_sp_boulardii	GCA_000734875.3
Saccharomyces	Saccharomyces_cerevisiae_x_Saccharomyces_eubayanus	GCA_009666015.1	Saccharomyces_sp_boulardii	GCA_001545975.1
Saccharomyces	Saccharomyces_cerevisiae_x_Saccharomyces_eubayanus	GCA_009666015.1	Saccharomyces_cerevisiae_x_Saccharomyces_eubayanus_x_Saccharomyces_kudriavzevii_x_Saccharomyces_uvarum	GCA_009667055.1
Saccharomyces	Saccharomyces_cerevisiae_x_Saccharomyces_eubayanus	GCA_009666015.1	Saccharomyces_cerevisiae_x_Saccharomyces_eubayanus_x_Saccharomyces_kudriavzevii_x_Saccharomyces_uvarum	GCA_009666875.1
Saccharomyces	Saccharomyces_cerevisiae_x_Saccharomyces_eubayanus	GCA_009666015.1	Saccharomyces_cerevisiae_x_Saccharomyces_eubayanus_x_Saccharomyces_kudriavzevii_x_Saccharomyces_uvarum	GCA_009666495.1
Saccharomyces	Saccharomyces_cerevisiae_x_Saccharomyces_eubayanus	GCA_009666015.1	Saccharomyces_pastorianus	GCA_001483335.1
Saccharomyces	Saccharomyces_cerevisiae_x_Saccharomyces_eubayanus	GCA_009666015.1	Saccharomyces_pastorianus	GCA_001483345.1
Saccharomyces	Saccharomyces_cerevisiae_x_Saccharomyces_eubayanus	GCA_009666015.1	Saccharomyces_pastorianus	GCA_000182115.1
Saccharomyces	Saccharomyces_cerevisiae_x_Saccharomyces_eubayanus	GCA_009666015.1	Saccharomyces_pastorianus	GCA_002557695.1
Saccharomyces	Saccharomyces_cerevisiae_x_Saccharomyces_eubayanus	GCA_009666015.1	Saccharomyces_pastorianus	GCA_000586535.1
Saccharomyces	Saccharomyces_cerevisiae_x_Saccharomyces_eubayanus	GCA_009666015.1	Saccharomyces_pastorianus	GCA_003004515.1
Saccharomyces	Saccharomyces_cerevisiae_x_Saccharomyces_eubayanus	GCA_009666015.1	Saccharomyces_pastorianus	GCA_001515445.2
Saccharomyces	Saccharomyces_cerevisiae_x_Saccharomyces_eubayanus	GCA_009666015.1	Saccharomyces_pastorianus	GCA_001515485.2
Saccharomyces	Saccharomyces_cerevisiae_x_Saccharomyces_eubayanus	GCA_009666015.1	Saccharomyces_pastorianus	GCA_011022315.1
Saccharomyces	Saccharomyces_cerevisiae_x_Saccharomyces_eubayanus	GCA_009666015.1	Saccharomyces_pastorianus	GCA_000586595.1
Saccharomyces	Saccharomyces_cerevisiae_x_Saccharomyces_eubayanus	GCA_009666015.1	Saccharomyces_cerevisiae_x_Saccharomyces_kudriavzevii	GCA_009665985.1
Saccharomyces	Saccharomyces_cerevisiae_x_Saccharomyces_eubayanus	GCA_009666015.1	Saccharomyces_cerevisiae_x_Saccharomyces_kudriavzevii	GCA_000326105.1
Saccharomyces	Saccharomyces_cerevisiae_x_Saccharomyces_eubayanus	GCA_009666015.1	Saccharomyces_cerevisiae_x_Saccharomyces_kudriavzevii	GCA_009667545.1
Saccharomyces	Saccharomyces_cerevisiae_x_Saccharomyces_eubayanus	GCA_009666015.1	Saccharomyces_cerevisiae_x_Saccharomyces_kudriavzevii	GCA_009666265.1
Saccharomyces	Saccharomyces_cerevisiae_x_Saccharomyces_eubayanus	GCA_009666015.1	Saccharomyces_cerevisiae_x_Saccharomyces_kudriavzevii	GCA_009667415.1
Saccharomyces	Saccharomyces_cerevisiae_x_Saccharomyces_eubayanus	GCA_009666015.1	Saccharomyces_cerevisiae_x_Saccharomyces_kudriavzevii	GCA_009665535.1
Saccharomyces	Saccharomyces_cerevisiae_x_Saccharomyces_eubayanus	GCA_009666015.1	Saccharomyces_cerevisiae_x_Saccharomyces_kudriavzevii	GCA_009665545.1
Saccharomyces	Saccharomyces_cerevisiae_x_Saccharomyces_eubayanus	GCA_009666015.1	Saccharomyces_cerevisiae_x_Saccharomyces_kudriavzevii	GCA_003004545.1
Saccharomyces	Saccharomyces_cerevisiae_x_Saccharomyces_eubayanus	GCA_009666015.1	Saccharomyces_cerevisiae	GCA_003273395.1
Saccharomyces	Saccharomyces_cerevisiae_x_Saccharomyces_eubayanus	GCA_009666015.1	Saccharomyces_cerevisiae	GCA_003274975.1
Saccharomyces	Saccharomyces_cerevisiae_x_Saccharomyces_eubayanus	GCA_009666015.1	Saccharomyces_cerevisiae	GCA_001739075.1
Saccharomyces	Saccharomyces_cerevisiae_x_Saccharomyces_eubayanus	GCA_009666015.1	Saccharomyces_cerevisiae	GCA_001741555.1
Saccharomyces	Saccharomyces_cerevisiae_x_Saccharomyces_eubayanus	GCA_009666015.1	Saccharomyces_cerevisiae	GCA_001671625.1
Saccharomyces	Saccharomyces_cerevisiae_x_Saccharomyces_eubayanus	GCA_009666015.1	Saccharomyces_cerevisiae	GCA_002250225.1
Saccharomyces	Saccharomyces_cerevisiae_x_Saccharomyces_eubayanus	GCA_009666015.1	Saccharomyces_cerevisiae	GCA_900178365.1
Saccharomyces	Saccharomyces_cerevisiae_x_Saccharomyces_eubayanus	GCA_009666015.1	Saccharomyces_cerevisiae	GCA_001741705.1
Saccharomyces	Saccharomyces_cerevisiae_x_Saccharomyces_eubayanus	GCA_009666015.1	Saccharomyces_cerevisiae	GCA_003272315.1
Saccharomyces	Saccharomyces_cerevisiae_x_Saccharomyces_eubayanus	GCA_009666015.1	Saccharomyces_cerevisiae	GCA_001739105.1
Saccharomyces	Saccharomyces_cerevisiae_x_Saccharomyces_eubayanus	GCA_009665685.1	Saccharomyces_eubayanus_x_Saccharomyces_uvarum	GCA_009666765.1
Saccharomyces	Saccharomyces_cerevisiae_x_Saccharomyces_eubayanus	GCA_009665685.1	Saccharomyces_eubayanus_x_Saccharomyces_uvarum	GCA_009666405.1
Saccharomyces	Saccharomyces_cerevisiae_x_Saccharomyces_eubayanus	GCA_009665685.1	Saccharomyces_eubayanus_x_Saccharomyces_uvarum	GCA_009667275.1
Saccharomyces	Saccharomyces_cerevisiae_x_Saccharomyces_eubayanus	GCA_009665685.1	Saccharomyces_eubayanus_x_Saccharomyces_uvarum	GCA_009666585.1
Saccharomyces	Saccharomyces_cerevisiae_x_Saccharomyces_eubayanus	GCA_009665685.1	Saccharomyces_eubayanus_x_Saccharomyces_uvarum	GCA_009667145.1
Saccharomyces	Saccharomyces_cerevisiae_x_Saccharomyces_eubayanus	GCA_009665685.1	Saccharomyces_eubayanus_x_Saccharomyces_uvarum	GCA_009667075.1
Saccharomyces	Saccharomyces_cerevisiae_x_Saccharomyces_eubayanus	GCA_009665685.1	Saccharomyces_sp_boulardii	GCA_000769245.1
Saccharomyces	Saccharomyces_cerevisiae_x_Saccharomyces_eubayanus	GCA_009665685.1	Saccharomyces_sp_boulardii	GCA_001625055.1
Saccharomyces	Saccharomyces_cerevisiae_x_Saccharomyces_eubayanus	GCA_009665685.1	Saccharomyces_sp_boulardii	GCA_000442675.2
Saccharomyces	Saccharomyces_cerevisiae_x_Saccharomyces_eubayanus	GCA_009665685.1	Saccharomyces_sp_boulardii	GCA_001298375.2
Saccharomyces	Saccharomyces_cerevisiae_x_Saccharomyces_eubayanus	GCA_009665685.1	Saccharomyces_sp_boulardii	GCA_001413975.1
Saccharomyces	Saccharomyces_cerevisiae_x_Saccharomyces_eubayanus	GCA_009665685.1	Saccharomyces_sp_boulardii	GCA_001545905.1
Saccharomyces	Saccharomyces_cerevisiae_x_Saccharomyces_eubayanus	GCA_009665685.1	Saccharomyces_sp_boulardii	GCA_000734875.3
Saccharomyces	Saccharomyces_cerevisiae_x_Saccharomyces_eubayanus	GCA_009665685.1	Saccharomyces_sp_boulardii	GCA_001545975.1
Saccharomyces	Saccharomyces_cerevisiae_x_Saccharomyces_eubayanus	GCA_009665685.1	Saccharomyces_cerevisiae_x_Saccharomyces_eubayanus_x_Saccharomyces_kudriavzevii_x_Saccharomyces_uvarum	GCA_009667055.1
Saccharomyces	Saccharomyces_cerevisiae_x_Saccharomyces_eubayanus	GCA_009665685.1	Saccharomyces_cerevisiae_x_Saccharomyces_eubayanus_x_Saccharomyces_kudriavzevii_x_Saccharomyces_uvarum	GCA_009666875.1
Saccharomyces	Saccharomyces_cerevisiae_x_Saccharomyces_eubayanus	GCA_009665685.1	Saccharomyces_cerevisiae_x_Saccharomyces_eubayanus_x_Saccharomyces_kudriavzevii_x_Saccharomyces_uvarum	GCA_009666495.1
Saccharomyces	Saccharomyces_cerevisiae_x_Saccharomyces_eubayanus	GCA_009665685.1	Saccharomyces_pastorianus	GCA_001483335.1
Saccharomyces	Saccharomyces_cerevisiae_x_Saccharomyces_eubayanus	GCA_009665685.1	Saccharomyces_pastorianus	GCA_001483345.1
Saccharomyces	Saccharomyces_cerevisiae_x_Saccharomyces_eubayanus	GCA_009665685.1	Saccharomyces_pastorianus	GCA_000182115.1
Saccharomyces	Saccharomyces_cerevisiae_x_Saccharomyces_eubayanus	GCA_009665685.1	Saccharomyces_pastorianus	GCA_002557695.1
Saccharomyces	Saccharomyces_cerevisiae_x_Saccharomyces_eubayanus	GCA_009665685.1	Saccharomyces_pastorianus	GCA_000586535.1
Saccharomyces	Saccharomyces_cerevisiae_x_Saccharomyces_eubayanus	GCA_009665685.1	Saccharomyces_pastorianus	GCA_003004515.1
Saccharomyces	Saccharomyces_cerevisiae_x_Saccharomyces_eubayanus	GCA_009665685.1	Saccharomyces_pastorianus	GCA_001515445.2
Saccharomyces	Saccharomyces_cerevisiae_x_Saccharomyces_eubayanus	GCA_009665685.1	Saccharomyces_pastorianus	GCA_001515485.2
Saccharomyces	Saccharomyces_cerevisiae_x_Saccharomyces_eubayanus	GCA_009665685.1	Saccharomyces_pastorianus	GCA_011022315.1
Saccharomyces	Saccharomyces_cerevisiae_x_Saccharomyces_eubayanus	GCA_009665685.1	Saccharomyces_pastorianus	GCA_000586595.1
Saccharomyces	Saccharomyces_cerevisiae_x_Saccharomyces_eubayanus	GCA_009665685.1	Saccharomyces_cerevisiae_x_Saccharomyces_kudriavzevii	GCA_009665985.1
Saccharomyces	Saccharomyces_cerevisiae_x_Saccharomyces_eubayanus	GCA_009665685.1	Saccharomyces_cerevisiae_x_Saccharomyces_kudriavzevii	GCA_000326105.1
Saccharomyces	Saccharomyces_cerevisiae_x_Saccharomyces_eubayanus	GCA_009665685.1	Saccharomyces_cerevisiae_x_Saccharomyces_kudriavzevii	GCA_009667545.1
Saccharomyces	Saccharomyces_cerevisiae_x_Saccharomyces_eubayanus	GCA_009665685.1	Saccharomyces_cerevisiae_x_Saccharomyces_kudriavzevii	GCA_009666265.1
Saccharomyces	Saccharomyces_cerevisiae_x_Saccharomyces_eubayanus	GCA_009665685.1	Saccharomyces_cerevisiae_x_Saccharomyces_kudriavzevii	GCA_009667415.1
Saccharomyces	Saccharomyces_cerevisiae_x_Saccharomyces_eubayanus	GCA_009665685.1	Saccharomyces_cerevisiae_x_Saccharomyces_kudriavzevii	GCA_009665535.1
Saccharomyces	Saccharomyces_cerevisiae_x_Saccharomyces_eubayanus	GCA_009665685.1	Saccharomyces_cerevisiae_x_Saccharomyces_kudriavzevii	GCA_009665545.1
Saccharomyces	Saccharomyces_cerevisiae_x_Saccharomyces_eubayanus	GCA_009665685.1	Saccharomyces_cerevisiae_x_Saccharomyces_kudriavzevii	GCA_003004545.1
Saccharomyces	Saccharomyces_cerevisiae_x_Saccharomyces_eubayanus	GCA_009665685.1	Saccharomyces_cerevisiae	GCA_003273395.1
Saccharomyces	Saccharomyces_cerevisiae_x_Saccharomyces_eubayanus	GCA_009665685.1	Saccharomyces_cerevisiae	GCA_003274975.1
Saccharomyces	Saccharomyces_cerevisiae_x_Saccharomyces_eubayanus	GCA_009665685.1	Saccharomyces_cerevisiae	GCA_001739075.1
Saccharomyces	Saccharomyces_cerevisiae_x_Saccharomyces_eubayanus	GCA_009665685.1	Saccharomyces_cerevisiae	GCA_001741555.1
Saccharomyces	Saccharomyces_cerevisiae_x_Saccharomyces_eubayanus	GCA_009665685.1	Saccharomyces_cerevisiae	GCA_001671625.1
Saccharomyces	Saccharomyces_cerevisiae_x_Saccharomyces_eubayanus	GCA_009665685.1	Saccharomyces_cerevisiae	GCA_002250225.1
Saccharomyces	Saccharomyces_cerevisiae_x_Saccharomyces_eubayanus	GCA_009665685.1	Saccharomyces_cerevisiae	GCA_900178365.1
Saccharomyces	Saccharomyces_cerevisiae_x_Saccharomyces_eubayanus	GCA_009665685.1	Saccharomyces_cerevisiae	GCA_001741705.1
Saccharomyces	Saccharomyces_cerevisiae_x_Saccharomyces_eubayanus	GCA_009665685.1	Saccharomyces_cerevisiae	GCA_003272315.1
Saccharomyces	Saccharomyces_cerevisiae_x_Saccharomyces_eubayanus	GCA_009665685.1	Saccharomyces_cerevisiae	GCA_001739105.1
Saccharomyces	Saccharomyces_cerevisiae_x_Saccharomyces_eubayanus	GCA_009667345.1	Saccharomyces_eubayanus_x_Saccharomyces_uvarum	GCA_009667385.1
Saccharomyces	Saccharomyces_cerevisiae_x_Saccharomyces_eubayanus	GCA_009667345.1	Saccharomyces_eubayanus_x_Saccharomyces_uvarum	GCA_009666765.1
Saccharomyces	Saccharomyces_cerevisiae_x_Saccharomyces_eubayanus	GCA_009667345.1	Saccharomyces_eubayanus_x_Saccharomyces_uvarum	GCA_009666405.1
Saccharomyces	Saccharomyces_cerevisiae_x_Saccharomyces_eubayanus	GCA_009667345.1	Saccharomyces_eubayanus_x_Saccharomyces_uvarum	GCA_009667275.1
Saccharomyces	Saccharomyces_cerevisiae_x_Saccharomyces_eubayanus	GCA_009667345.1	Saccharomyces_eubayanus_x_Saccharomyces_uvarum	GCA_009666585.1
Saccharomyces	Saccharomyces_cerevisiae_x_Saccharomyces_eubayanus	GCA_009667345.1	Saccharomyces_eubayanus_x_Saccharomyces_uvarum	GCA_009667145.1
Saccharomyces	Saccharomyces_cerevisiae_x_Saccharomyces_eubayanus	GCA_009667345.1	Saccharomyces_eubayanus_x_Saccharomyces_uvarum	GCA_009667075.1
Saccharomyces	Saccharomyces_cerevisiae_x_Saccharomyces_eubayanus	GCA_009667345.1	Saccharomyces_sp_boulardii	GCA_000769245.1
Saccharomyces	Saccharomyces_cerevisiae_x_Saccharomyces_eubayanus	GCA_009667345.1	Saccharomyces_sp_boulardii	GCA_001625055.1
Saccharomyces	Saccharomyces_cerevisiae_x_Saccharomyces_eubayanus	GCA_009667345.1	Saccharomyces_sp_boulardii	GCA_000442675.2
Saccharomyces	Saccharomyces_cerevisiae_x_Saccharomyces_eubayanus	GCA_009667345.1	Saccharomyces_sp_boulardii	GCA_001298375.2
Saccharomyces	Saccharomyces_cerevisiae_x_Saccharomyces_eubayanus	GCA_009667345.1	Saccharomyces_sp_boulardii	GCA_001413975.1
Saccharomyces	Saccharomyces_cerevisiae_x_Saccharomyces_eubayanus	GCA_009667345.1	Saccharomyces_sp_boulardii	GCA_001545905.1
Saccharomyces	Saccharomyces_cerevisiae_x_Saccharomyces_eubayanus	GCA_009667345.1	Saccharomyces_sp_boulardii	GCA_000734875.3
Saccharomyces	Saccharomyces_cerevisiae_x_Saccharomyces_eubayanus	GCA_009667345.1	Saccharomyces_sp_boulardii	GCA_001545975.1
Saccharomyces	Saccharomyces_cerevisiae_x_Saccharomyces_eubayanus	GCA_009667345.1	Saccharomyces_cerevisiae_x_Saccharomyces_eubayanus_x_Saccharomyces_kudriavzevii_x_Saccharomyces_uvarum	GCA_009667055.1
Saccharomyces	Saccharomyces_cerevisiae_x_Saccharomyces_eubayanus	GCA_009667345.1	Saccharomyces_cerevisiae_x_Saccharomyces_eubayanus_x_Saccharomyces_kudriavzevii_x_Saccharomyces_uvarum	GCA_009666875.1
Saccharomyces	Saccharomyces_cerevisiae_x_Saccharomyces_eubayanus	GCA_009667345.1	Saccharomyces_cerevisiae_x_Saccharomyces_eubayanus_x_Saccharomyces_kudriavzevii_x_Saccharomyces_uvarum	GCA_009666495.1
Saccharomyces	Saccharomyces_cerevisiae_x_Saccharomyces_eubayanus	GCA_009667345.1	Saccharomyces_pastorianus	GCA_001483335.1
Saccharomyces	Saccharomyces_cerevisiae_x_Saccharomyces_eubayanus	GCA_009667345.1	Saccharomyces_pastorianus	GCA_001483345.1
Saccharomyces	Saccharomyces_cerevisiae_x_Saccharomyces_eubayanus	GCA_009667345.1	Saccharomyces_pastorianus	GCA_000182115.1
Saccharomyces	Saccharomyces_cerevisiae_x_Saccharomyces_eubayanus	GCA_009667345.1	Saccharomyces_pastorianus	GCA_002557695.1
Saccharomyces	Saccharomyces_cerevisiae_x_Saccharomyces_eubayanus	GCA_009667345.1	Saccharomyces_pastorianus	GCA_000586535.1
Saccharomyces	Saccharomyces_cerevisiae_x_Saccharomyces_eubayanus	GCA_009667345.1	Saccharomyces_pastorianus	GCA_003004515.1
Saccharomyces	Saccharomyces_cerevisiae_x_Saccharomyces_eubayanus	GCA_009667345.1	Saccharomyces_pastorianus	GCA_001515445.2
Saccharomyces	Saccharomyces_cerevisiae_x_Saccharomyces_eubayanus	GCA_009667345.1	Saccharomyces_pastorianus	GCA_001515485.2
Saccharomyces	Saccharomyces_cerevisiae_x_Saccharomyces_eubayanus	GCA_009667345.1	Saccharomyces_pastorianus	GCA_011022315.1
Saccharomyces	Saccharomyces_cerevisiae_x_Saccharomyces_eubayanus	GCA_009667345.1	Saccharomyces_pastorianus	GCA_000586595.1
Saccharomyces	Saccharomyces_cerevisiae_x_Saccharomyces_eubayanus	GCA_009667345.1	Saccharomyces_cerevisiae_x_Saccharomyces_kudriavzevii	GCA_009665985.1
Saccharomyces	Saccharomyces_cerevisiae_x_Saccharomyces_eubayanus	GCA_009667345.1	Saccharomyces_cerevisiae_x_Saccharomyces_kudriavzevii	GCA_000326105.1
Saccharomyces	Saccharomyces_cerevisiae_x_Saccharomyces_eubayanus	GCA_009667345.1	Saccharomyces_cerevisiae_x_Saccharomyces_kudriavzevii	GCA_009667545.1
Saccharomyces	Saccharomyces_cerevisiae_x_Saccharomyces_eubayanus	GCA_009667345.1	Saccharomyces_cerevisiae_x_Saccharomyces_kudriavzevii	GCA_009666265.1
Saccharomyces	Saccharomyces_cerevisiae_x_Saccharomyces_eubayanus	GCA_009667345.1	Saccharomyces_cerevisiae_x_Saccharomyces_kudriavzevii	GCA_009667415.1
Saccharomyces	Saccharomyces_cerevisiae_x_Saccharomyces_eubayanus	GCA_009667345.1	Saccharomyces_cerevisiae_x_Saccharomyces_kudriavzevii	GCA_009665535.1
Saccharomyces	Saccharomyces_cerevisiae_x_Saccharomyces_eubayanus	GCA_009667345.1	Saccharomyces_cerevisiae_x_Saccharomyces_kudriavzevii	GCA_009665545.1
Saccharomyces	Saccharomyces_cerevisiae_x_Saccharomyces_eubayanus	GCA_009667345.1	Saccharomyces_cerevisiae_x_Saccharomyces_kudriavzevii	GCA_003004545.1
Saccharomyces	Saccharomyces_cerevisiae_x_Saccharomyces_eubayanus	GCA_009667345.1	Saccharomyces_cerevisiae	GCA_003273395.1
Saccharomyces	Saccharomyces_cerevisiae_x_Saccharomyces_eubayanus	GCA_009667345.1	Saccharomyces_cerevisiae	GCA_003274975.1
Saccharomyces	Saccharomyces_cerevisiae_x_Saccharomyces_eubayanus	GCA_009667345.1	Saccharomyces_cerevisiae	GCA_001739075.1
Saccharomyces	Saccharomyces_cerevisiae_x_Saccharomyces_eubayanus	GCA_009667345.1	Saccharomyces_cerevisiae	GCA_001741555.1
Saccharomyces	Saccharomyces_cerevisiae_x_Saccharomyces_eubayanus	GCA_009667345.1	Saccharomyces_cerevisiae	GCA_001671625.1
Saccharomyces	Saccharomyces_cerevisiae_x_Saccharomyces_eubayanus	GCA_009667345.1	Saccharomyces_cerevisiae	GCA_002250225.1
Saccharomyces	Saccharomyces_cerevisiae_x_Saccharomyces_eubayanus	GCA_009667345.1	Saccharomyces_cerevisiae	GCA_900178365.1
Saccharomyces	Saccharomyces_cerevisiae_x_Saccharomyces_eubayanus	GCA_009667345.1	Saccharomyces_cerevisiae	GCA_001741705.1
Saccharomyces	Saccharomyces_cerevisiae_x_Saccharomyces_eubayanus	GCA_009667345.1	Saccharomyces_cerevisiae	GCA_003272315.1
Saccharomyces	Saccharomyces_cerevisiae_x_Saccharomyces_eubayanus	GCA_009667345.1	Saccharomyces_cerevisiae	GCA_001739105.1
Saccharomyces	Saccharomyces_cerevisiae_x_Saccharomyces_eubayanus	GCA_009666185.1	Saccharomyces_eubayanus_x_Saccharomyces_uvarum	GCA_009666765.1
Saccharomyces	Saccharomyces_cerevisiae_x_Saccharomyces_eubayanus	GCA_009666185.1	Saccharomyces_eubayanus_x_Saccharomyces_uvarum	GCA_009666405.1
Saccharomyces	Saccharomyces_cerevisiae_x_Saccharomyces_eubayanus	GCA_009666185.1	Saccharomyces_eubayanus_x_Saccharomyces_uvarum	GCA_009667275.1
Saccharomyces	Saccharomyces_cerevisiae_x_Saccharomyces_eubayanus	GCA_009666185.1	Saccharomyces_eubayanus_x_Saccharomyces_uvarum	GCA_009666585.1
Saccharomyces	Saccharomyces_cerevisiae_x_Saccharomyces_eubayanus	GCA_009666185.1	Saccharomyces_eubayanus_x_Saccharomyces_uvarum	GCA_009667145.1
Saccharomyces	Saccharomyces_cerevisiae_x_Saccharomyces_eubayanus	GCA_009666185.1	Saccharomyces_eubayanus_x_Saccharomyces_uvarum	GCA_009667075.1
Saccharomyces	Saccharomyces_cerevisiae_x_Saccharomyces_eubayanus	GCA_009666185.1	Saccharomyces_sp_boulardii	GCA_000769245.1
Saccharomyces	Saccharomyces_cerevisiae_x_Saccharomyces_eubayanus	GCA_009666185.1	Saccharomyces_sp_boulardii	GCA_001625055.1
Saccharomyces	Saccharomyces_cerevisiae_x_Saccharomyces_eubayanus	GCA_009666185.1	Saccharomyces_sp_boulardii	GCA_000442675.2
Saccharomyces	Saccharomyces_cerevisiae_x_Saccharomyces_eubayanus	GCA_009666185.1	Saccharomyces_sp_boulardii	GCA_001298375.2
Saccharomyces	Saccharomyces_cerevisiae_x_Saccharomyces_eubayanus	GCA_009666185.1	Saccharomyces_sp_boulardii	GCA_001413975.1
Saccharomyces	Saccharomyces_cerevisiae_x_Saccharomyces_eubayanus	GCA_009666185.1	Saccharomyces_sp_boulardii	GCA_001545905.1
Saccharomyces	Saccharomyces_cerevisiae_x_Saccharomyces_eubayanus	GCA_009666185.1	Saccharomyces_sp_boulardii	GCA_000734875.3
Saccharomyces	Saccharomyces_cerevisiae_x_Saccharomyces_eubayanus	GCA_009666185.1	Saccharomyces_sp_boulardii	GCA_001545975.1
Saccharomyces	Saccharomyces_cerevisiae_x_Saccharomyces_eubayanus	GCA_009666185.1	Saccharomyces_cerevisiae_x_Saccharomyces_eubayanus_x_Saccharomyces_kudriavzevii_x_Saccharomyces_uvarum	GCA_009667055.1
Saccharomyces	Saccharomyces_cerevisiae_x_Saccharomyces_eubayanus	GCA_009666185.1	Saccharomyces_cerevisiae_x_Saccharomyces_eubayanus_x_Saccharomyces_kudriavzevii_x_Saccharomyces_uvarum	GCA_009666875.1
Saccharomyces	Saccharomyces_cerevisiae_x_Saccharomyces_eubayanus	GCA_009666185.1	Saccharomyces_cerevisiae_x_Saccharomyces_eubayanus_x_Saccharomyces_kudriavzevii_x_Saccharomyces_uvarum	GCA_009666495.1
Saccharomyces	Saccharomyces_cerevisiae_x_Saccharomyces_eubayanus	GCA_009666185.1	Saccharomyces_pastorianus	GCA_001483335.1
Saccharomyces	Saccharomyces_cerevisiae_x_Saccharomyces_eubayanus	GCA_009666185.1	Saccharomyces_pastorianus	GCA_001483345.1
Saccharomyces	Saccharomyces_cerevisiae_x_Saccharomyces_eubayanus	GCA_009666185.1	Saccharomyces_pastorianus	GCA_000182115.1
Saccharomyces	Saccharomyces_cerevisiae_x_Saccharomyces_eubayanus	GCA_009666185.1	Saccharomyces_pastorianus	GCA_002557695.1
Saccharomyces	Saccharomyces_cerevisiae_x_Saccharomyces_eubayanus	GCA_009666185.1	Saccharomyces_pastorianus	GCA_000586535.1
Saccharomyces	Saccharomyces_cerevisiae_x_Saccharomyces_eubayanus	GCA_009666185.1	Saccharomyces_pastorianus	GCA_003004515.1
Saccharomyces	Saccharomyces_cerevisiae_x_Saccharomyces_eubayanus	GCA_009666185.1	Saccharomyces_pastorianus	GCA_001515445.2
Saccharomyces	Saccharomyces_cerevisiae_x_Saccharomyces_eubayanus	GCA_009666185.1	Saccharomyces_pastorianus	GCA_001515485.2
Saccharomyces	Saccharomyces_cerevisiae_x_Saccharomyces_eubayanus	GCA_009666185.1	Saccharomyces_pastorianus	GCA_011022315.1
Saccharomyces	Saccharomyces_cerevisiae_x_Saccharomyces_eubayanus	GCA_009666185.1	Saccharomyces_pastorianus	GCA_000586595.1
Saccharomyces	Saccharomyces_cerevisiae_x_Saccharomyces_eubayanus	GCA_009666185.1	Saccharomyces_cerevisiae_x_Saccharomyces_kudriavzevii	GCA_009665985.1
Saccharomyces	Saccharomyces_cerevisiae_x_Saccharomyces_eubayanus	GCA_009666185.1	Saccharomyces_cerevisiae_x_Saccharomyces_kudriavzevii	GCA_000326105.1
Saccharomyces	Saccharomyces_cerevisiae_x_Saccharomyces_eubayanus	GCA_009666185.1	Saccharomyces_cerevisiae_x_Saccharomyces_kudriavzevii	GCA_009667545.1
Saccharomyces	Saccharomyces_cerevisiae_x_Saccharomyces_eubayanus	GCA_009666185.1	Saccharomyces_cerevisiae_x_Saccharomyces_kudriavzevii	GCA_009666265.1
Saccharomyces	Saccharomyces_cerevisiae_x_Saccharomyces_eubayanus	GCA_009666185.1	Saccharomyces_cerevisiae_x_Saccharomyces_kudriavzevii	GCA_009667415.1
Saccharomyces	Saccharomyces_cerevisiae_x_Saccharomyces_eubayanus	GCA_009666185.1	Saccharomyces_cerevisiae_x_Saccharomyces_kudriavzevii	GCA_009665535.1
Saccharomyces	Saccharomyces_cerevisiae_x_Saccharomyces_eubayanus	GCA_009666185.1	Saccharomyces_cerevisiae_x_Saccharomyces_kudriavzevii	GCA_009665545.1
Saccharomyces	Saccharomyces_cerevisiae_x_Saccharomyces_eubayanus	GCA_009666185.1	Saccharomyces_cerevisiae_x_Saccharomyces_kudriavzevii	GCA_003004545.1
Saccharomyces	Saccharomyces_cerevisiae_x_Saccharomyces_eubayanus	GCA_009666185.1	Saccharomyces_cerevisiae	GCA_003273395.1
Saccharomyces	Saccharomyces_cerevisiae_x_Saccharomyces_eubayanus	GCA_009666185.1	Saccharomyces_cerevisiae	GCA_003274975.1
Saccharomyces	Saccharomyces_cerevisiae_x_Saccharomyces_eubayanus	GCA_009666185.1	Saccharomyces_cerevisiae	GCA_001739075.1
Saccharomyces	Saccharomyces_cerevisiae_x_Saccharomyces_eubayanus	GCA_009666185.1	Saccharomyces_cerevisiae	GCA_001741555.1
Saccharomyces	Saccharomyces_cerevisiae_x_Saccharomyces_eubayanus	GCA_009666185.1	Saccharomyces_cerevisiae	GCA_001671625.1
Saccharomyces	Saccharomyces_cerevisiae_x_Saccharomyces_eubayanus	GCA_009666185.1	Saccharomyces_cerevisiae	GCA_002250225.1
Saccharomyces	Saccharomyces_cerevisiae_x_Saccharomyces_eubayanus	GCA_009666185.1	Saccharomyces_cerevisiae	GCA_900178365.1
Saccharomyces	Saccharomyces_cerevisiae_x_Saccharomyces_eubayanus	GCA_009666185.1	Saccharomyces_cerevisiae	GCA_001741705.1
Saccharomyces	Saccharomyces_cerevisiae_x_Saccharomyces_eubayanus	GCA_009666185.1	Saccharomyces_cerevisiae	GCA_003272315.1
Saccharomyces	Saccharomyces_cerevisiae_x_Saccharomyces_eubayanus	GCA_009666185.1	Saccharomyces_cerevisiae	GCA_001739105.1
Saccharomyces	Saccharomyces_cerevisiae_x_Saccharomyces_eubayanus	GCA_009665705.1	Saccharomyces_eubayanus_x_Saccharomyces_uvarum	GCA_009666765.1
Saccharomyces	Saccharomyces_cerevisiae_x_Saccharomyces_eubayanus	GCA_009665705.1	Saccharomyces_eubayanus_x_Saccharomyces_uvarum	GCA_009666405.1
Saccharomyces	Saccharomyces_cerevisiae_x_Saccharomyces_eubayanus	GCA_009665705.1	Saccharomyces_eubayanus_x_Saccharomyces_uvarum	GCA_009667275.1
Saccharomyces	Saccharomyces_cerevisiae_x_Saccharomyces_eubayanus	GCA_009665705.1	Saccharomyces_eubayanus_x_Saccharomyces_uvarum	GCA_009666585.1
Saccharomyces	Saccharomyces_cerevisiae_x_Saccharomyces_eubayanus	GCA_009665705.1	Saccharomyces_eubayanus_x_Saccharomyces_uvarum	GCA_009667145.1
Saccharomyces	Saccharomyces_cerevisiae_x_Saccharomyces_eubayanus	GCA_009665705.1	Saccharomyces_eubayanus_x_Saccharomyces_uvarum	GCA_009667075.1
Saccharomyces	Saccharomyces_cerevisiae_x_Saccharomyces_eubayanus	GCA_009665705.1	Saccharomyces_sp_boulardii	GCA_000769245.1
Saccharomyces	Saccharomyces_cerevisiae_x_Saccharomyces_eubayanus	GCA_009665705.1	Saccharomyces_sp_boulardii	GCA_001625055.1
Saccharomyces	Saccharomyces_cerevisiae_x_Saccharomyces_eubayanus	GCA_009665705.1	Saccharomyces_sp_boulardii	GCA_000442675.2
Saccharomyces	Saccharomyces_cerevisiae_x_Saccharomyces_eubayanus	GCA_009665705.1	Saccharomyces_sp_boulardii	GCA_001298375.2
Saccharomyces	Saccharomyces_cerevisiae_x_Saccharomyces_eubayanus	GCA_009665705.1	Saccharomyces_sp_boulardii	GCA_001413975.1
Saccharomyces	Saccharomyces_cerevisiae_x_Saccharomyces_eubayanus	GCA_009665705.1	Saccharomyces_sp_boulardii	GCA_001545905.1
Saccharomyces	Saccharomyces_cerevisiae_x_Saccharomyces_eubayanus	GCA_009665705.1	Saccharomyces_sp_boulardii	GCA_000734875.3
Saccharomyces	Saccharomyces_cerevisiae_x_Saccharomyces_eubayanus	GCA_009665705.1	Saccharomyces_sp_boulardii	GCA_001545975.1
Saccharomyces	Saccharomyces_cerevisiae_x_Saccharomyces_eubayanus	GCA_009665705.1	Saccharomyces_cerevisiae_x_Saccharomyces_eubayanus_x_Saccharomyces_kudriavzevii_x_Saccharomyces_uvarum	GCA_009667055.1
Saccharomyces	Saccharomyces_cerevisiae_x_Saccharomyces_eubayanus	GCA_009665705.1	Saccharomyces_cerevisiae_x_Saccharomyces_eubayanus_x_Saccharomyces_kudriavzevii_x_Saccharomyces_uvarum	GCA_009666875.1
Saccharomyces	Saccharomyces_cerevisiae_x_Saccharomyces_eubayanus	GCA_009665705.1	Saccharomyces_cerevisiae_x_Saccharomyces_eubayanus_x_Saccharomyces_kudriavzevii_x_Saccharomyces_uvarum	GCA_009666495.1
Saccharomyces	Saccharomyces_cerevisiae_x_Saccharomyces_eubayanus	GCA_009665705.1	Saccharomyces_pastorianus	GCA_001483335.1
Saccharomyces	Saccharomyces_cerevisiae_x_Saccharomyces_eubayanus	GCA_009665705.1	Saccharomyces_pastorianus	GCA_001483345.1
Saccharomyces	Saccharomyces_cerevisiae_x_Saccharomyces_eubayanus	GCA_009665705.1	Saccharomyces_pastorianus	GCA_000182115.1
Saccharomyces	Saccharomyces_cerevisiae_x_Saccharomyces_eubayanus	GCA_009665705.1	Saccharomyces_pastorianus	GCA_002557695.1
Saccharomyces	Saccharomyces_cerevisiae_x_Saccharomyces_eubayanus	GCA_009665705.1	Saccharomyces_pastorianus	GCA_000586535.1
Saccharomyces	Saccharomyces_cerevisiae_x_Saccharomyces_eubayanus	GCA_009665705.1	Saccharomyces_pastorianus	GCA_003004515.1
Saccharomyces	Saccharomyces_cerevisiae_x_Saccharomyces_eubayanus	GCA_009665705.1	Saccharomyces_pastorianus	GCA_001515445.2
Saccharomyces	Saccharomyces_cerevisiae_x_Saccharomyces_eubayanus	GCA_009665705.1	Saccharomyces_pastorianus	GCA_001515485.2
Saccharomyces	Saccharomyces_cerevisiae_x_Saccharomyces_eubayanus	GCA_009665705.1	Saccharomyces_pastorianus	GCA_011022315.1
Saccharomyces	Saccharomyces_cerevisiae_x_Saccharomyces_eubayanus	GCA_009665705.1	Saccharomyces_pastorianus	GCA_000586595.1
Saccharomyces	Saccharomyces_cerevisiae_x_Saccharomyces_eubayanus	GCA_009665705.1	Saccharomyces_cerevisiae_x_Saccharomyces_kudriavzevii	GCA_009665985.1
Saccharomyces	Saccharomyces_cerevisiae_x_Saccharomyces_eubayanus	GCA_009665705.1	Saccharomyces_cerevisiae_x_Saccharomyces_kudriavzevii	GCA_000326105.1
Saccharomyces	Saccharomyces_cerevisiae_x_Saccharomyces_eubayanus	GCA_009665705.1	Saccharomyces_cerevisiae_x_Saccharomyces_kudriavzevii	GCA_009667545.1
Saccharomyces	Saccharomyces_cerevisiae_x_Saccharomyces_eubayanus	GCA_009665705.1	Saccharomyces_cerevisiae_x_Saccharomyces_kudriavzevii	GCA_009666265.1
Saccharomyces	Saccharomyces_cerevisiae_x_Saccharomyces_eubayanus	GCA_009665705.1	Saccharomyces_cerevisiae_x_Saccharomyces_kudriavzevii	GCA_009667415.1
Saccharomyces	Saccharomyces_cerevisiae_x_Saccharomyces_eubayanus	GCA_009665705.1	Saccharomyces_cerevisiae_x_Saccharomyces_kudriavzevii	GCA_009665535.1
Saccharomyces	Saccharomyces_cerevisiae_x_Saccharomyces_eubayanus	GCA_009665705.1	Saccharomyces_cerevisiae_x_Saccharomyces_kudriavzevii	GCA_009665545.1
Saccharomyces	Saccharomyces_cerevisiae_x_Saccharomyces_eubayanus	GCA_009665705.1	Saccharomyces_cerevisiae_x_Saccharomyces_kudriavzevii	GCA_003004545.1
Saccharomyces	Saccharomyces_cerevisiae_x_Saccharomyces_eubayanus	GCA_009665705.1	Saccharomyces_cerevisiae	GCA_003273395.1
Saccharomyces	Saccharomyces_cerevisiae_x_Saccharomyces_eubayanus	GCA_009665705.1	Saccharomyces_cerevisiae	GCA_003274975.1
Saccharomyces	Saccharomyces_cerevisiae_x_Saccharomyces_eubayanus	GCA_009665705.1	Saccharomyces_cerevisiae	GCA_001739075.1
Saccharomyces	Saccharomyces_cerevisiae_x_Saccharomyces_eubayanus	GCA_009665705.1	Saccharomyces_cerevisiae	GCA_001741555.1
Saccharomyces	Saccharomyces_cerevisiae_x_Saccharomyces_eubayanus	GCA_009665705.1	Saccharomyces_cerevisiae	GCA_001671625.1
Saccharomyces	Saccharomyces_cerevisiae_x_Saccharomyces_eubayanus	GCA_009665705.1	Saccharomyces_cerevisiae	GCA_002250225.1
Saccharomyces	Saccharomyces_cerevisiae_x_Saccharomyces_eubayanus	GCA_009665705.1	Saccharomyces_cerevisiae	GCA_900178365.1
Saccharomyces	Saccharomyces_cerevisiae_x_Saccharomyces_eubayanus	GCA_009665705.1	Saccharomyces_cerevisiae	GCA_001741705.1
Saccharomyces	Saccharomyces_cerevisiae_x_Saccharomyces_eubayanus	GCA_009665705.1	Saccharomyces_cerevisiae	GCA_003272315.1
Saccharomyces	Saccharomyces_cerevisiae_x_Saccharomyces_eubayanus	GCA_009665705.1	Saccharomyces_cerevisiae	GCA_001739105.1
Saccharomyces	Saccharomyces_cerevisiae_x_Saccharomyces_eubayanus	GCA_009666635.1	Saccharomyces_eubayanus_x_Saccharomyces_uvarum	GCA_009666765.1
Saccharomyces	Saccharomyces_cerevisiae_x_Saccharomyces_eubayanus	GCA_009666635.1	Saccharomyces_eubayanus_x_Saccharomyces_uvarum	GCA_009666405.1
Saccharomyces	Saccharomyces_cerevisiae_x_Saccharomyces_eubayanus	GCA_009666635.1	Saccharomyces_eubayanus_x_Saccharomyces_uvarum	GCA_009667275.1
Saccharomyces	Saccharomyces_cerevisiae_x_Saccharomyces_eubayanus	GCA_009666635.1	Saccharomyces_eubayanus_x_Saccharomyces_uvarum	GCA_009666585.1
Saccharomyces	Saccharomyces_cerevisiae_x_Saccharomyces_eubayanus	GCA_009666635.1	Saccharomyces_eubayanus_x_Saccharomyces_uvarum	GCA_009667145.1
Saccharomyces	Saccharomyces_cerevisiae_x_Saccharomyces_eubayanus	GCA_009666635.1	Saccharomyces_eubayanus_x_Saccharomyces_uvarum	GCA_009667075.1
Saccharomyces	Saccharomyces_cerevisiae_x_Saccharomyces_eubayanus	GCA_009666635.1	Saccharomyces_sp_boulardii	GCA_000769245.1
Saccharomyces	Saccharomyces_cerevisiae_x_Saccharomyces_eubayanus	GCA_009666635.1	Saccharomyces_sp_boulardii	GCA_001625055.1
Saccharomyces	Saccharomyces_cerevisiae_x_Saccharomyces_eubayanus	GCA_009666635.1	Saccharomyces_sp_boulardii	GCA_000442675.2
Saccharomyces	Saccharomyces_cerevisiae_x_Saccharomyces_eubayanus	GCA_009666635.1	Saccharomyces_sp_boulardii	GCA_001298375.2
Saccharomyces	Saccharomyces_cerevisiae_x_Saccharomyces_eubayanus	GCA_009666635.1	Saccharomyces_sp_boulardii	GCA_001413975.1
Saccharomyces	Saccharomyces_cerevisiae_x_Saccharomyces_eubayanus	GCA_009666635.1	Saccharomyces_sp_boulardii	GCA_001545905.1
Saccharomyces	Saccharomyces_cerevisiae_x_Saccharomyces_eubayanus	GCA_009666635.1	Saccharomyces_sp_boulardii	GCA_000734875.3
Saccharomyces	Saccharomyces_cerevisiae_x_Saccharomyces_eubayanus	GCA_009666635.1	Saccharomyces_sp_boulardii	GCA_001545975.1
Saccharomyces	Saccharomyces_cerevisiae_x_Saccharomyces_eubayanus	GCA_009666635.1	Saccharomyces_cerevisiae_x_Saccharomyces_eubayanus_x_Saccharomyces_kudriavzevii_x_Saccharomyces_uvarum	GCA_009667055.1
Saccharomyces	Saccharomyces_cerevisiae_x_Saccharomyces_eubayanus	GCA_009666635.1	Saccharomyces_cerevisiae_x_Saccharomyces_eubayanus_x_Saccharomyces_kudriavzevii_x_Saccharomyces_uvarum	GCA_009666875.1
Saccharomyces	Saccharomyces_cerevisiae_x_Saccharomyces_eubayanus	GCA_009666635.1	Saccharomyces_cerevisiae_x_Saccharomyces_eubayanus_x_Saccharomyces_kudriavzevii_x_Saccharomyces_uvarum	GCA_009666495.1
Saccharomyces	Saccharomyces_cerevisiae_x_Saccharomyces_eubayanus	GCA_009666635.1	Saccharomyces_pastorianus	GCA_001483335.1
Saccharomyces	Saccharomyces_cerevisiae_x_Saccharomyces_eubayanus	GCA_009666635.1	Saccharomyces_pastorianus	GCA_001483345.1
Saccharomyces	Saccharomyces_cerevisiae_x_Saccharomyces_eubayanus	GCA_009666635.1	Saccharomyces_pastorianus	GCA_000182115.1
Saccharomyces	Saccharomyces_cerevisiae_x_Saccharomyces_eubayanus	GCA_009666635.1	Saccharomyces_pastorianus	GCA_002557695.1
Saccharomyces	Saccharomyces_cerevisiae_x_Saccharomyces_eubayanus	GCA_009666635.1	Saccharomyces_pastorianus	GCA_000586535.1
Saccharomyces	Saccharomyces_cerevisiae_x_Saccharomyces_eubayanus	GCA_009666635.1	Saccharomyces_pastorianus	GCA_003004515.1
Saccharomyces	Saccharomyces_cerevisiae_x_Saccharomyces_eubayanus	GCA_009666635.1	Saccharomyces_pastorianus	GCA_001515445.2
Saccharomyces	Saccharomyces_cerevisiae_x_Saccharomyces_eubayanus	GCA_009666635.1	Saccharomyces_pastorianus	GCA_001515485.2
Saccharomyces	Saccharomyces_cerevisiae_x_Saccharomyces_eubayanus	GCA_009666635.1	Saccharomyces_pastorianus	GCA_011022315.1
Saccharomyces	Saccharomyces_cerevisiae_x_Saccharomyces_eubayanus	GCA_009666635.1	Saccharomyces_pastorianus	GCA_000586595.1
Saccharomyces	Saccharomyces_cerevisiae_x_Saccharomyces_eubayanus	GCA_009666635.1	Saccharomyces_cerevisiae_x_Saccharomyces_kudriavzevii	GCA_009665985.1
Saccharomyces	Saccharomyces_cerevisiae_x_Saccharomyces_eubayanus	GCA_009666635.1	Saccharomyces_cerevisiae_x_Saccharomyces_kudriavzevii	GCA_000326105.1
Saccharomyces	Saccharomyces_cerevisiae_x_Saccharomyces_eubayanus	GCA_009666635.1	Saccharomyces_cerevisiae_x_Saccharomyces_kudriavzevii	GCA_009667545.1
Saccharomyces	Saccharomyces_cerevisiae_x_Saccharomyces_eubayanus	GCA_009666635.1	Saccharomyces_cerevisiae_x_Saccharomyces_kudriavzevii	GCA_009666265.1
Saccharomyces	Saccharomyces_cerevisiae_x_Saccharomyces_eubayanus	GCA_009666635.1	Saccharomyces_cerevisiae_x_Saccharomyces_kudriavzevii	GCA_009667415.1
Saccharomyces	Saccharomyces_cerevisiae_x_Saccharomyces_eubayanus	GCA_009666635.1	Saccharomyces_cerevisiae_x_Saccharomyces_kudriavzevii	GCA_009665535.1
Saccharomyces	Saccharomyces_cerevisiae_x_Saccharomyces_eubayanus	GCA_009666635.1	Saccharomyces_cerevisiae_x_Saccharomyces_kudriavzevii	GCA_009665545.1
Saccharomyces	Saccharomyces_cerevisiae_x_Saccharomyces_eubayanus	GCA_009666635.1	Saccharomyces_cerevisiae_x_Saccharomyces_kudriavzevii	GCA_003004545.1
Saccharomyces	Saccharomyces_cerevisiae_x_Saccharomyces_eubayanus	GCA_009666635.1	Saccharomyces_cerevisiae	GCA_003273395.1
Saccharomyces	Saccharomyces_cerevisiae_x_Saccharomyces_eubayanus	GCA_009666635.1	Saccharomyces_cerevisiae	GCA_003274975.1
Saccharomyces	Saccharomyces_cerevisiae_x_Saccharomyces_eubayanus	GCA_009666635.1	Saccharomyces_cerevisiae	GCA_001739075.1
Saccharomyces	Saccharomyces_cerevisiae_x_Saccharomyces_eubayanus	GCA_009666635.1	Saccharomyces_cerevisiae	GCA_001741555.1
Saccharomyces	Saccharomyces_cerevisiae_x_Saccharomyces_eubayanus	GCA_009666635.1	Saccharomyces_cerevisiae	GCA_001671625.1
Saccharomyces	Saccharomyces_cerevisiae_x_Saccharomyces_eubayanus	GCA_009666635.1	Saccharomyces_cerevisiae	GCA_002250225.1
Saccharomyces	Saccharomyces_cerevisiae_x_Saccharomyces_eubayanus	GCA_009666635.1	Saccharomyces_cerevisiae	GCA_900178365.1
Saccharomyces	Saccharomyces_cerevisiae_x_Saccharomyces_eubayanus	GCA_009666635.1	Saccharomyces_cerevisiae	GCA_001741705.1
Saccharomyces	Saccharomyces_cerevisiae_x_Saccharomyces_eubayanus	GCA_009666635.1	Saccharomyces_cerevisiae	GCA_003272315.1
Saccharomyces	Saccharomyces_cerevisiae_x_Saccharomyces_eubayanus	GCA_009666635.1	Saccharomyces_cerevisiae	GCA_001739105.1
Saccharomyces	Saccharomyces_eubayanus_x_Saccharomyces_uvarum	GCA_009667385.1	Saccharomyces_uvarum	GCA_000166995.1
Saccharomyces	Saccharomyces_eubayanus_x_Saccharomyces_uvarum	GCA_009667385.1	Saccharomyces_uvarum	GCA_000732305.1
Saccharomyces	Saccharomyces_eubayanus_x_Saccharomyces_uvarum	GCA_009667385.1	Saccharomyces_uvarum	GCA_002242715.1
Saccharomyces	Saccharomyces_eubayanus_x_Saccharomyces_uvarum	GCA_009667385.1	Saccharomyces_uvarum	GCA_002242635.1
Saccharomyces	Saccharomyces_eubayanus_x_Saccharomyces_uvarum	GCA_009667385.1	Saccharomyces_uvarum	GCA_002242675.1
Saccharomyces	Saccharomyces_eubayanus_x_Saccharomyces_uvarum	GCA_009667385.1	Saccharomyces_uvarum	GCA_002242645.1
Saccharomyces	Saccharomyces_eubayanus_x_Saccharomyces_uvarum	GCA_009667385.1	Saccharomyces_pastorianus	GCA_002557695.1
Saccharomyces	Saccharomyces_eubayanus_x_Saccharomyces_uvarum	GCA_009667385.1	Saccharomyces_pastorianus	GCA_001515445.2
Saccharomyces	Saccharomyces_eubayanus_x_Saccharomyces_uvarum	GCA_009667385.1	Saccharomyces_pastorianus	GCA_000586595.1
Saccharomyces	Saccharomyces_eubayanus_x_Saccharomyces_uvarum	GCA_009666765.1	Saccharomyces_uvarum	GCA_000166995.1
Saccharomyces	Saccharomyces_eubayanus_x_Saccharomyces_uvarum	GCA_009666765.1	Saccharomyces_uvarum	GCA_000732305.1
Saccharomyces	Saccharomyces_eubayanus_x_Saccharomyces_uvarum	GCA_009666765.1	Saccharomyces_uvarum	GCA_002242715.1
Saccharomyces	Saccharomyces_eubayanus_x_Saccharomyces_uvarum	GCA_009666765.1	Saccharomyces_uvarum	GCA_002242635.1
Saccharomyces	Saccharomyces_eubayanus_x_Saccharomyces_uvarum	GCA_009666765.1	Saccharomyces_uvarum	GCA_002242675.1
Saccharomyces	Saccharomyces_eubayanus_x_Saccharomyces_uvarum	GCA_009666765.1	Saccharomyces_uvarum	GCA_002242645.1
Saccharomyces	Saccharomyces_eubayanus_x_Saccharomyces_uvarum	GCA_009666765.1	Saccharomyces_pastorianus	GCA_001483335.1
Saccharomyces	Saccharomyces_eubayanus_x_Saccharomyces_uvarum	GCA_009666765.1	Saccharomyces_pastorianus	GCA_000182115.1
Saccharomyces	Saccharomyces_eubayanus_x_Saccharomyces_uvarum	GCA_009666765.1	Saccharomyces_pastorianus	GCA_002557695.1
Saccharomyces	Saccharomyces_eubayanus_x_Saccharomyces_uvarum	GCA_009666765.1	Saccharomyces_pastorianus	GCA_000586535.1
Saccharomyces	Saccharomyces_eubayanus_x_Saccharomyces_uvarum	GCA_009666765.1	Saccharomyces_pastorianus	GCA_001515445.2
Saccharomyces	Saccharomyces_eubayanus_x_Saccharomyces_uvarum	GCA_009666765.1	Saccharomyces_pastorianus	GCA_001515485.2
Saccharomyces	Saccharomyces_eubayanus_x_Saccharomyces_uvarum	GCA_009666765.1	Saccharomyces_pastorianus	GCA_011022315.1
Saccharomyces	Saccharomyces_eubayanus_x_Saccharomyces_uvarum	GCA_009666765.1	Saccharomyces_pastorianus	GCA_000586595.1
Saccharomyces	Saccharomyces_eubayanus_x_Saccharomyces_uvarum	GCA_009666765.1	Saccharomyces_cerevisiae_x_Saccharomyces_kudriavzevii	GCA_003004545.1
Saccharomyces	Saccharomyces_eubayanus_x_Saccharomyces_uvarum	GCA_009666405.1	Saccharomyces_uvarum	GCA_000166995.1
Saccharomyces	Saccharomyces_eubayanus_x_Saccharomyces_uvarum	GCA_009666405.1	Saccharomyces_uvarum	GCA_000732305.1
Saccharomyces	Saccharomyces_eubayanus_x_Saccharomyces_uvarum	GCA_009666405.1	Saccharomyces_uvarum	GCA_002242715.1
Saccharomyces	Saccharomyces_eubayanus_x_Saccharomyces_uvarum	GCA_009666405.1	Saccharomyces_uvarum	GCA_002242635.1
Saccharomyces	Saccharomyces_eubayanus_x_Saccharomyces_uvarum	GCA_009666405.1	Saccharomyces_uvarum	GCA_002242675.1
Saccharomyces	Saccharomyces_eubayanus_x_Saccharomyces_uvarum	GCA_009666405.1	Saccharomyces_uvarum	GCA_002242645.1
Saccharomyces	Saccharomyces_eubayanus_x_Saccharomyces_uvarum	GCA_009666405.1	Saccharomyces_cerevisiae_x_Saccharomyces_eubayanus_x_Saccharomyces_kudriavzevii_x_Saccharomyces_uvarum	GCA_009667055.1
Saccharomyces	Saccharomyces_eubayanus_x_Saccharomyces_uvarum	GCA_009666405.1	Saccharomyces_cerevisiae_x_Saccharomyces_eubayanus_x_Saccharomyces_kudriavzevii_x_Saccharomyces_uvarum	GCA_009666495.1
Saccharomyces	Saccharomyces_eubayanus_x_Saccharomyces_uvarum	GCA_009666405.1	Saccharomyces_pastorianus	GCA_001483335.1
Saccharomyces	Saccharomyces_eubayanus_x_Saccharomyces_uvarum	GCA_009666405.1	Saccharomyces_pastorianus	GCA_000182115.1
Saccharomyces	Saccharomyces_eubayanus_x_Saccharomyces_uvarum	GCA_009666405.1	Saccharomyces_pastorianus	GCA_002557695.1
Saccharomyces	Saccharomyces_eubayanus_x_Saccharomyces_uvarum	GCA_009666405.1	Saccharomyces_pastorianus	GCA_000586535.1
Saccharomyces	Saccharomyces_eubayanus_x_Saccharomyces_uvarum	GCA_009666405.1	Saccharomyces_pastorianus	GCA_001515445.2
Saccharomyces	Saccharomyces_eubayanus_x_Saccharomyces_uvarum	GCA_009666405.1	Saccharomyces_pastorianus	GCA_001515485.2
Saccharomyces	Saccharomyces_eubayanus_x_Saccharomyces_uvarum	GCA_009666405.1	Saccharomyces_pastorianus	GCA_011022315.1
Saccharomyces	Saccharomyces_eubayanus_x_Saccharomyces_uvarum	GCA_009666405.1	Saccharomyces_pastorianus	GCA_000586595.1
Saccharomyces	Saccharomyces_eubayanus_x_Saccharomyces_uvarum	GCA_009666405.1	Saccharomyces_cerevisiae_x_Saccharomyces_kudriavzevii	GCA_003004545.1
Saccharomyces	Saccharomyces_eubayanus_x_Saccharomyces_uvarum	GCA_009667275.1	Saccharomyces_uvarum	GCA_000166995.1
Saccharomyces	Saccharomyces_eubayanus_x_Saccharomyces_uvarum	GCA_009667275.1	Saccharomyces_uvarum	GCA_000732305.1
Saccharomyces	Saccharomyces_eubayanus_x_Saccharomyces_uvarum	GCA_009667275.1	Saccharomyces_uvarum	GCA_002242715.1
Saccharomyces	Saccharomyces_eubayanus_x_Saccharomyces_uvarum	GCA_009667275.1	Saccharomyces_uvarum	GCA_002242635.1
Saccharomyces	Saccharomyces_eubayanus_x_Saccharomyces_uvarum	GCA_009667275.1	Saccharomyces_uvarum	GCA_002242675.1
Saccharomyces	Saccharomyces_eubayanus_x_Saccharomyces_uvarum	GCA_009667275.1	Saccharomyces_uvarum	GCA_002242645.1
Saccharomyces	Saccharomyces_eubayanus_x_Saccharomyces_uvarum	GCA_009667275.1	Saccharomyces_pastorianus	GCA_000182115.1
Saccharomyces	Saccharomyces_eubayanus_x_Saccharomyces_uvarum	GCA_009667275.1	Saccharomyces_pastorianus	GCA_002557695.1
Saccharomyces	Saccharomyces_eubayanus_x_Saccharomyces_uvarum	GCA_009667275.1	Saccharomyces_pastorianus	GCA_000586535.1
Saccharomyces	Saccharomyces_eubayanus_x_Saccharomyces_uvarum	GCA_009667275.1	Saccharomyces_pastorianus	GCA_001515445.2
Saccharomyces	Saccharomyces_eubayanus_x_Saccharomyces_uvarum	GCA_009667275.1	Saccharomyces_pastorianus	GCA_001515485.2
Saccharomyces	Saccharomyces_eubayanus_x_Saccharomyces_uvarum	GCA_009667275.1	Saccharomyces_pastorianus	GCA_011022315.1
Saccharomyces	Saccharomyces_eubayanus_x_Saccharomyces_uvarum	GCA_009667275.1	Saccharomyces_pastorianus	GCA_000586595.1
Saccharomyces	Saccharomyces_eubayanus_x_Saccharomyces_uvarum	GCA_009667275.1	Saccharomyces_cerevisiae_x_Saccharomyces_kudriavzevii	GCA_003004545.1
Saccharomyces	Saccharomyces_eubayanus_x_Saccharomyces_uvarum	GCA_009666335.1	Saccharomyces_uvarum	GCA_000166995.1
Saccharomyces	Saccharomyces_eubayanus_x_Saccharomyces_uvarum	GCA_009666335.1	Saccharomyces_uvarum	GCA_000732305.1
Saccharomyces	Saccharomyces_eubayanus_x_Saccharomyces_uvarum	GCA_009666335.1	Saccharomyces_uvarum	GCA_002242715.1
Saccharomyces	Saccharomyces_eubayanus_x_Saccharomyces_uvarum	GCA_009666335.1	Saccharomyces_uvarum	GCA_002242635.1
Saccharomyces	Saccharomyces_eubayanus_x_Saccharomyces_uvarum	GCA_009666335.1	Saccharomyces_uvarum	GCA_002242675.1
Saccharomyces	Saccharomyces_eubayanus_x_Saccharomyces_uvarum	GCA_009666335.1	Saccharomyces_uvarum	GCA_002242645.1
Saccharomyces	Saccharomyces_eubayanus_x_Saccharomyces_uvarum	GCA_009666335.1	Saccharomyces_cerevisiae_x_Saccharomyces_eubayanus_x_Saccharomyces_kudriavzevii_x_Saccharomyces_uvarum	GCA_009667055.1
Saccharomyces	Saccharomyces_eubayanus_x_Saccharomyces_uvarum	GCA_009666335.1	Saccharomyces_cerevisiae_x_Saccharomyces_eubayanus_x_Saccharomyces_kudriavzevii_x_Saccharomyces_uvarum	GCA_009666875.1
Saccharomyces	Saccharomyces_eubayanus_x_Saccharomyces_uvarum	GCA_009666335.1	Saccharomyces_cerevisiae_x_Saccharomyces_eubayanus_x_Saccharomyces_kudriavzevii_x_Saccharomyces_uvarum	GCA_009666495.1
Saccharomyces	Saccharomyces_eubayanus_x_Saccharomyces_uvarum	GCA_009666905.1	Saccharomyces_uvarum	GCA_000166995.1
Saccharomyces	Saccharomyces_eubayanus_x_Saccharomyces_uvarum	GCA_009666905.1	Saccharomyces_uvarum	GCA_000732305.1
Saccharomyces	Saccharomyces_eubayanus_x_Saccharomyces_uvarum	GCA_009666905.1	Saccharomyces_uvarum	GCA_002242715.1
Saccharomyces	Saccharomyces_eubayanus_x_Saccharomyces_uvarum	GCA_009666905.1	Saccharomyces_uvarum	GCA_002242635.1
Saccharomyces	Saccharomyces_eubayanus_x_Saccharomyces_uvarum	GCA_009666905.1	Saccharomyces_uvarum	GCA_002242675.1
Saccharomyces	Saccharomyces_eubayanus_x_Saccharomyces_uvarum	GCA_009666905.1	Saccharomyces_uvarum	GCA_002242645.1
Saccharomyces	Saccharomyces_eubayanus_x_Saccharomyces_uvarum	GCA_009666905.1	Saccharomyces_cerevisiae_x_Saccharomyces_eubayanus_x_Saccharomyces_kudriavzevii_x_Saccharomyces_uvarum	GCA_009667055.1
Saccharomyces	Saccharomyces_eubayanus_x_Saccharomyces_uvarum	GCA_009666905.1	Saccharomyces_cerevisiae_x_Saccharomyces_eubayanus_x_Saccharomyces_kudriavzevii_x_Saccharomyces_uvarum	GCA_009666875.1
Saccharomyces	Saccharomyces_eubayanus_x_Saccharomyces_uvarum	GCA_009666905.1	Saccharomyces_cerevisiae_x_Saccharomyces_eubayanus_x_Saccharomyces_kudriavzevii_x_Saccharomyces_uvarum	GCA_009666495.1
Saccharomyces	Saccharomyces_eubayanus_x_Saccharomyces_uvarum	GCA_009666585.1	Saccharomyces_uvarum	GCA_000166995.1
Saccharomyces	Saccharomyces_eubayanus_x_Saccharomyces_uvarum	GCA_009666585.1	Saccharomyces_uvarum	GCA_000732305.1
Saccharomyces	Saccharomyces_eubayanus_x_Saccharomyces_uvarum	GCA_009666585.1	Saccharomyces_uvarum	GCA_002242715.1
Saccharomyces	Saccharomyces_eubayanus_x_Saccharomyces_uvarum	GCA_009666585.1	Saccharomyces_uvarum	GCA_002242635.1
Saccharomyces	Saccharomyces_eubayanus_x_Saccharomyces_uvarum	GCA_009666585.1	Saccharomyces_uvarum	GCA_002242675.1
Saccharomyces	Saccharomyces_eubayanus_x_Saccharomyces_uvarum	GCA_009666585.1	Saccharomyces_uvarum	GCA_002242645.1
Saccharomyces	Saccharomyces_eubayanus_x_Saccharomyces_uvarum	GCA_009666585.1	Saccharomyces_pastorianus	GCA_000182115.1
Saccharomyces	Saccharomyces_eubayanus_x_Saccharomyces_uvarum	GCA_009666585.1	Saccharomyces_pastorianus	GCA_002557695.1
Saccharomyces	Saccharomyces_eubayanus_x_Saccharomyces_uvarum	GCA_009666585.1	Saccharomyces_pastorianus	GCA_000586535.1
Saccharomyces	Saccharomyces_eubayanus_x_Saccharomyces_uvarum	GCA_009666585.1	Saccharomyces_pastorianus	GCA_001515445.2
Saccharomyces	Saccharomyces_eubayanus_x_Saccharomyces_uvarum	GCA_009666585.1	Saccharomyces_pastorianus	GCA_001515485.2
Saccharomyces	Saccharomyces_eubayanus_x_Saccharomyces_uvarum	GCA_009666585.1	Saccharomyces_pastorianus	GCA_011022315.1
Saccharomyces	Saccharomyces_eubayanus_x_Saccharomyces_uvarum	GCA_009666585.1	Saccharomyces_pastorianus	GCA_000586595.1
Saccharomyces	Saccharomyces_eubayanus_x_Saccharomyces_uvarum	GCA_009666585.1	Saccharomyces_cerevisiae_x_Saccharomyces_kudriavzevii	GCA_003004545.1
Saccharomyces	Saccharomyces_eubayanus_x_Saccharomyces_uvarum	GCA_009667145.1	Saccharomyces_uvarum	GCA_000166995.1
Saccharomyces	Saccharomyces_eubayanus_x_Saccharomyces_uvarum	GCA_009667145.1	Saccharomyces_uvarum	GCA_000732305.1
Saccharomyces	Saccharomyces_eubayanus_x_Saccharomyces_uvarum	GCA_009667145.1	Saccharomyces_uvarum	GCA_002242715.1
Saccharomyces	Saccharomyces_eubayanus_x_Saccharomyces_uvarum	GCA_009667145.1	Saccharomyces_uvarum	GCA_002242635.1
Saccharomyces	Saccharomyces_eubayanus_x_Saccharomyces_uvarum	GCA_009667145.1	Saccharomyces_uvarum	GCA_002242675.1
Saccharomyces	Saccharomyces_eubayanus_x_Saccharomyces_uvarum	GCA_009667145.1	Saccharomyces_uvarum	GCA_002242645.1
Saccharomyces	Saccharomyces_eubayanus_x_Saccharomyces_uvarum	GCA_009667145.1	Saccharomyces_pastorianus	GCA_000182115.1
Saccharomyces	Saccharomyces_eubayanus_x_Saccharomyces_uvarum	GCA_009667145.1	Saccharomyces_pastorianus	GCA_002557695.1
Saccharomyces	Saccharomyces_eubayanus_x_Saccharomyces_uvarum	GCA_009667145.1	Saccharomyces_pastorianus	GCA_000586535.1
Saccharomyces	Saccharomyces_eubayanus_x_Saccharomyces_uvarum	GCA_009667145.1	Saccharomyces_pastorianus	GCA_001515445.2
Saccharomyces	Saccharomyces_eubayanus_x_Saccharomyces_uvarum	GCA_009667145.1	Saccharomyces_pastorianus	GCA_001515485.2
Saccharomyces	Saccharomyces_eubayanus_x_Saccharomyces_uvarum	GCA_009667145.1	Saccharomyces_pastorianus	GCA_011022315.1
Saccharomyces	Saccharomyces_eubayanus_x_Saccharomyces_uvarum	GCA_009667145.1	Saccharomyces_pastorianus	GCA_000586595.1
Saccharomyces	Saccharomyces_eubayanus_x_Saccharomyces_uvarum	GCA_009667145.1	Saccharomyces_cerevisiae_x_Saccharomyces_kudriavzevii	GCA_003004545.1
Saccharomyces	Saccharomyces_eubayanus_x_Saccharomyces_uvarum	GCA_009666865.1	Saccharomyces_uvarum	GCA_000166995.1
Saccharomyces	Saccharomyces_eubayanus_x_Saccharomyces_uvarum	GCA_009666865.1	Saccharomyces_uvarum	GCA_000732305.1
Saccharomyces	Saccharomyces_eubayanus_x_Saccharomyces_uvarum	GCA_009666865.1	Saccharomyces_uvarum	GCA_002242715.1
Saccharomyces	Saccharomyces_eubayanus_x_Saccharomyces_uvarum	GCA_009666865.1	Saccharomyces_uvarum	GCA_002242635.1
Saccharomyces	Saccharomyces_eubayanus_x_Saccharomyces_uvarum	GCA_009666865.1	Saccharomyces_uvarum	GCA_002242675.1
Saccharomyces	Saccharomyces_eubayanus_x_Saccharomyces_uvarum	GCA_009666865.1	Saccharomyces_uvarum	GCA_002242645.1
Saccharomyces	Saccharomyces_eubayanus_x_Saccharomyces_uvarum	GCA_009666865.1	Saccharomyces_cerevisiae_x_Saccharomyces_eubayanus_x_Saccharomyces_kudriavzevii_x_Saccharomyces_uvarum	GCA_009667055.1
Saccharomyces	Saccharomyces_eubayanus_x_Saccharomyces_uvarum	GCA_009666865.1	Saccharomyces_cerevisiae_x_Saccharomyces_eubayanus_x_Saccharomyces_kudriavzevii_x_Saccharomyces_uvarum	GCA_009666875.1
Saccharomyces	Saccharomyces_eubayanus_x_Saccharomyces_uvarum	GCA_009666865.1	Saccharomyces_cerevisiae_x_Saccharomyces_eubayanus_x_Saccharomyces_kudriavzevii_x_Saccharomyces_uvarum	GCA_009666495.1
Saccharomyces	Saccharomyces_eubayanus_x_Saccharomyces_uvarum	GCA_009667075.1	Saccharomyces_uvarum	GCA_000166995.1
Saccharomyces	Saccharomyces_eubayanus_x_Saccharomyces_uvarum	GCA_009667075.1	Saccharomyces_uvarum	GCA_000732305.1
Saccharomyces	Saccharomyces_eubayanus_x_Saccharomyces_uvarum	GCA_009667075.1	Saccharomyces_uvarum	GCA_002242715.1
Saccharomyces	Saccharomyces_eubayanus_x_Saccharomyces_uvarum	GCA_009667075.1	Saccharomyces_uvarum	GCA_002242635.1
Saccharomyces	Saccharomyces_eubayanus_x_Saccharomyces_uvarum	GCA_009667075.1	Saccharomyces_uvarum	GCA_002242675.1
Saccharomyces	Saccharomyces_eubayanus_x_Saccharomyces_uvarum	GCA_009667075.1	Saccharomyces_uvarum	GCA_002242645.1
Saccharomyces	Saccharomyces_eubayanus_x_Saccharomyces_uvarum	GCA_009667075.1	Saccharomyces_pastorianus	GCA_001483335.1
Saccharomyces	Saccharomyces_eubayanus_x_Saccharomyces_uvarum	GCA_009667075.1	Saccharomyces_pastorianus	GCA_000182115.1
Saccharomyces	Saccharomyces_eubayanus_x_Saccharomyces_uvarum	GCA_009667075.1	Saccharomyces_pastorianus	GCA_002557695.1
Saccharomyces	Saccharomyces_eubayanus_x_Saccharomyces_uvarum	GCA_009667075.1	Saccharomyces_pastorianus	GCA_000586535.1
Saccharomyces	Saccharomyces_eubayanus_x_Saccharomyces_uvarum	GCA_009667075.1	Saccharomyces_pastorianus	GCA_001515445.2
Saccharomyces	Saccharomyces_eubayanus_x_Saccharomyces_uvarum	GCA_009667075.1	Saccharomyces_pastorianus	GCA_001515485.2
Saccharomyces	Saccharomyces_eubayanus_x_Saccharomyces_uvarum	GCA_009667075.1	Saccharomyces_pastorianus	GCA_011022315.1
Saccharomyces	Saccharomyces_eubayanus_x_Saccharomyces_uvarum	GCA_009667075.1	Saccharomyces_pastorianus	GCA_000586595.1
Saccharomyces	Saccharomyces_eubayanus_x_Saccharomyces_uvarum	GCA_009667075.1	Saccharomyces_cerevisiae_x_Saccharomyces_kudriavzevii	GCA_003004545.1
Saccharomyces	Saccharomyces_uvarum	GCA_000166995.1	Saccharomyces_cerevisiae_x_Saccharomyces_eubayanus_x_Saccharomyces_kudriavzevii_x_Saccharomyces_uvarum	GCA_009667055.1
Saccharomyces	Saccharomyces_uvarum	GCA_000166995.1	Saccharomyces_cerevisiae_x_Saccharomyces_eubayanus_x_Saccharomyces_kudriavzevii_x_Saccharomyces_uvarum	GCA_009666875.1
Saccharomyces	Saccharomyces_uvarum	GCA_000166995.1	Saccharomyces_cerevisiae_x_Saccharomyces_eubayanus_x_Saccharomyces_kudriavzevii_x_Saccharomyces_uvarum	GCA_009666495.1
Saccharomyces	Saccharomyces_uvarum	GCA_000732305.1	Saccharomyces_cerevisiae_x_Saccharomyces_eubayanus_x_Saccharomyces_kudriavzevii_x_Saccharomyces_uvarum	GCA_009667055.1
Saccharomyces	Saccharomyces_uvarum	GCA_000732305.1	Saccharomyces_cerevisiae_x_Saccharomyces_eubayanus_x_Saccharomyces_kudriavzevii_x_Saccharomyces_uvarum	GCA_009666875.1
Saccharomyces	Saccharomyces_uvarum	GCA_000732305.1	Saccharomyces_cerevisiae_x_Saccharomyces_eubayanus_x_Saccharomyces_kudriavzevii_x_Saccharomyces_uvarum	GCA_009666495.1
Saccharomyces	Saccharomyces_uvarum	GCA_002242715.1	Saccharomyces_cerevisiae_x_Saccharomyces_eubayanus_x_Saccharomyces_kudriavzevii_x_Saccharomyces_uvarum	GCA_009667055.1
Saccharomyces	Saccharomyces_uvarum	GCA_002242715.1	Saccharomyces_cerevisiae_x_Saccharomyces_eubayanus_x_Saccharomyces_kudriavzevii_x_Saccharomyces_uvarum	GCA_009666875.1
Saccharomyces	Saccharomyces_uvarum	GCA_002242715.1	Saccharomyces_cerevisiae_x_Saccharomyces_eubayanus_x_Saccharomyces_kudriavzevii_x_Saccharomyces_uvarum	GCA_009666495.1
Saccharomyces	Saccharomyces_uvarum	GCA_002242635.1	Saccharomyces_cerevisiae_x_Saccharomyces_eubayanus_x_Saccharomyces_kudriavzevii_x_Saccharomyces_uvarum	GCA_009667055.1
Saccharomyces	Saccharomyces_uvarum	GCA_002242635.1	Saccharomyces_cerevisiae_x_Saccharomyces_eubayanus_x_Saccharomyces_kudriavzevii_x_Saccharomyces_uvarum	GCA_009666875.1
Saccharomyces	Saccharomyces_uvarum	GCA_002242635.1	Saccharomyces_cerevisiae_x_Saccharomyces_eubayanus_x_Saccharomyces_kudriavzevii_x_Saccharomyces_uvarum	GCA_009666495.1
Saccharomyces	Saccharomyces_uvarum	GCA_002242675.1	Saccharomyces_cerevisiae_x_Saccharomyces_eubayanus_x_Saccharomyces_kudriavzevii_x_Saccharomyces_uvarum	GCA_009667055.1
Saccharomyces	Saccharomyces_uvarum	GCA_002242675.1	Saccharomyces_cerevisiae_x_Saccharomyces_eubayanus_x_Saccharomyces_kudriavzevii_x_Saccharomyces_uvarum	GCA_009666875.1
Saccharomyces	Saccharomyces_uvarum	GCA_002242675.1	Saccharomyces_cerevisiae_x_Saccharomyces_eubayanus_x_Saccharomyces_kudriavzevii_x_Saccharomyces_uvarum	GCA_009666495.1
Saccharomyces	Saccharomyces_uvarum	GCA_002242645.1	Saccharomyces_cerevisiae_x_Saccharomyces_eubayanus_x_Saccharomyces_kudriavzevii_x_Saccharomyces_uvarum	GCA_009667055.1
Saccharomyces	Saccharomyces_uvarum	GCA_002242645.1	Saccharomyces_cerevisiae_x_Saccharomyces_eubayanus_x_Saccharomyces_kudriavzevii_x_Saccharomyces_uvarum	GCA_009666875.1
Saccharomyces	Saccharomyces_uvarum	GCA_002242645.1	Saccharomyces_cerevisiae_x_Saccharomyces_eubayanus_x_Saccharomyces_kudriavzevii_x_Saccharomyces_uvarum	GCA_009666495.1
Saccharomyces	Saccharomyces_sp_boulardii	GCA_000769245.1	Saccharomyces_cerevisiae_x_Saccharomyces_eubayanus_x_Saccharomyces_kudriavzevii_x_Saccharomyces_uvarum	GCA_009667055.1
Saccharomyces	Saccharomyces_sp_boulardii	GCA_000769245.1	Saccharomyces_cerevisiae_x_Saccharomyces_eubayanus_x_Saccharomyces_kudriavzevii_x_Saccharomyces_uvarum	GCA_009666875.1
Saccharomyces	Saccharomyces_sp_boulardii	GCA_000769245.1	Saccharomyces_cerevisiae_x_Saccharomyces_eubayanus_x_Saccharomyces_kudriavzevii_x_Saccharomyces_uvarum	GCA_009666495.1
Saccharomyces	Saccharomyces_sp_boulardii	GCA_000769245.1	Saccharomyces_pastorianus	GCA_001483335.1
Saccharomyces	Saccharomyces_sp_boulardii	GCA_000769245.1	Saccharomyces_pastorianus	GCA_001483345.1
Saccharomyces	Saccharomyces_sp_boulardii	GCA_000769245.1	Saccharomyces_pastorianus	GCA_000182115.1
Saccharomyces	Saccharomyces_sp_boulardii	GCA_000769245.1	Saccharomyces_pastorianus	GCA_000586535.1
Saccharomyces	Saccharomyces_sp_boulardii	GCA_000769245.1	Saccharomyces_pastorianus	GCA_003004515.1
Saccharomyces	Saccharomyces_sp_boulardii	GCA_000769245.1	Saccharomyces_pastorianus	GCA_001515445.2
Saccharomyces	Saccharomyces_sp_boulardii	GCA_000769245.1	Saccharomyces_pastorianus	GCA_001515485.2
Saccharomyces	Saccharomyces_sp_boulardii	GCA_000769245.1	Saccharomyces_pastorianus	GCA_011022315.1
Saccharomyces	Saccharomyces_sp_boulardii	GCA_000769245.1	Saccharomyces_pastorianus	GCA_000586595.1
Saccharomyces	Saccharomyces_sp_boulardii	GCA_000769245.1	Saccharomyces_cerevisiae_x_Saccharomyces_kudriavzevii	GCA_009665985.1
Saccharomyces	Saccharomyces_sp_boulardii	GCA_000769245.1	Saccharomyces_cerevisiae_x_Saccharomyces_kudriavzevii	GCA_000326105.1
Saccharomyces	Saccharomyces_sp_boulardii	GCA_000769245.1	Saccharomyces_cerevisiae_x_Saccharomyces_kudriavzevii	GCA_009667545.1
Saccharomyces	Saccharomyces_sp_boulardii	GCA_000769245.1	Saccharomyces_cerevisiae_x_Saccharomyces_kudriavzevii	GCA_009666265.1
Saccharomyces	Saccharomyces_sp_boulardii	GCA_000769245.1	Saccharomyces_cerevisiae_x_Saccharomyces_kudriavzevii	GCA_009667415.1
Saccharomyces	Saccharomyces_sp_boulardii	GCA_000769245.1	Saccharomyces_cerevisiae_x_Saccharomyces_kudriavzevii	GCA_009665535.1
Saccharomyces	Saccharomyces_sp_boulardii	GCA_000769245.1	Saccharomyces_cerevisiae_x_Saccharomyces_kudriavzevii	GCA_009665545.1
Saccharomyces	Saccharomyces_sp_boulardii	GCA_000769245.1	Saccharomyces_cerevisiae_x_Saccharomyces_kudriavzevii	GCA_003004545.1
Saccharomyces	Saccharomyces_sp_boulardii	GCA_000769245.1	Saccharomyces_cerevisiae	GCA_003273395.1
Saccharomyces	Saccharomyces_sp_boulardii	GCA_000769245.1	Saccharomyces_cerevisiae	GCA_003274975.1
Saccharomyces	Saccharomyces_sp_boulardii	GCA_000769245.1	Saccharomyces_cerevisiae	GCA_001739075.1
Saccharomyces	Saccharomyces_sp_boulardii	GCA_000769245.1	Saccharomyces_cerevisiae	GCA_001741555.1
Saccharomyces	Saccharomyces_sp_boulardii	GCA_000769245.1	Saccharomyces_cerevisiae	GCA_001671625.1
Saccharomyces	Saccharomyces_sp_boulardii	GCA_000769245.1	Saccharomyces_cerevisiae	GCA_002250225.1
Saccharomyces	Saccharomyces_sp_boulardii	GCA_000769245.1	Saccharomyces_cerevisiae	GCA_900178365.1
Saccharomyces	Saccharomyces_sp_boulardii	GCA_000769245.1	Saccharomyces_cerevisiae	GCA_001741705.1
Saccharomyces	Saccharomyces_sp_boulardii	GCA_000769245.1	Saccharomyces_cerevisiae	GCA_003272315.1
Saccharomyces	Saccharomyces_sp_boulardii	GCA_000769245.1	Saccharomyces_cerevisiae	GCA_001739105.1
Saccharomyces	Saccharomyces_sp_boulardii	GCA_001625055.1	Saccharomyces_cerevisiae_x_Saccharomyces_eubayanus_x_Saccharomyces_kudriavzevii_x_Saccharomyces_uvarum	GCA_009667055.1
Saccharomyces	Saccharomyces_sp_boulardii	GCA_001625055.1	Saccharomyces_cerevisiae_x_Saccharomyces_eubayanus_x_Saccharomyces_kudriavzevii_x_Saccharomyces_uvarum	GCA_009666875.1
Saccharomyces	Saccharomyces_sp_boulardii	GCA_001625055.1	Saccharomyces_cerevisiae_x_Saccharomyces_eubayanus_x_Saccharomyces_kudriavzevii_x_Saccharomyces_uvarum	GCA_009666495.1
Saccharomyces	Saccharomyces_sp_boulardii	GCA_001625055.1	Saccharomyces_pastorianus	GCA_001483335.1
Saccharomyces	Saccharomyces_sp_boulardii	GCA_001625055.1	Saccharomyces_pastorianus	GCA_001483345.1
Saccharomyces	Saccharomyces_sp_boulardii	GCA_001625055.1	Saccharomyces_pastorianus	GCA_000182115.1
Saccharomyces	Saccharomyces_sp_boulardii	GCA_001625055.1	Saccharomyces_pastorianus	GCA_000586535.1
Saccharomyces	Saccharomyces_sp_boulardii	GCA_001625055.1	Saccharomyces_pastorianus	GCA_003004515.1
Saccharomyces	Saccharomyces_sp_boulardii	GCA_001625055.1	Saccharomyces_pastorianus	GCA_001515445.2
Saccharomyces	Saccharomyces_sp_boulardii	GCA_001625055.1	Saccharomyces_pastorianus	GCA_001515485.2
Saccharomyces	Saccharomyces_sp_boulardii	GCA_001625055.1	Saccharomyces_pastorianus	GCA_011022315.1
Saccharomyces	Saccharomyces_sp_boulardii	GCA_001625055.1	Saccharomyces_pastorianus	GCA_000586595.1
Saccharomyces	Saccharomyces_sp_boulardii	GCA_001625055.1	Saccharomyces_cerevisiae_x_Saccharomyces_kudriavzevii	GCA_009665985.1
Saccharomyces	Saccharomyces_sp_boulardii	GCA_001625055.1	Saccharomyces_cerevisiae_x_Saccharomyces_kudriavzevii	GCA_000326105.1
Saccharomyces	Saccharomyces_sp_boulardii	GCA_001625055.1	Saccharomyces_cerevisiae_x_Saccharomyces_kudriavzevii	GCA_009667545.1
Saccharomyces	Saccharomyces_sp_boulardii	GCA_001625055.1	Saccharomyces_cerevisiae_x_Saccharomyces_kudriavzevii	GCA_009666265.1
Saccharomyces	Saccharomyces_sp_boulardii	GCA_001625055.1	Saccharomyces_cerevisiae_x_Saccharomyces_kudriavzevii	GCA_009667415.1
Saccharomyces	Saccharomyces_sp_boulardii	GCA_001625055.1	Saccharomyces_cerevisiae_x_Saccharomyces_kudriavzevii	GCA_009665535.1
Saccharomyces	Saccharomyces_sp_boulardii	GCA_001625055.1	Saccharomyces_cerevisiae_x_Saccharomyces_kudriavzevii	GCA_009665545.1
Saccharomyces	Saccharomyces_sp_boulardii	GCA_001625055.1	Saccharomyces_cerevisiae_x_Saccharomyces_kudriavzevii	GCA_003004545.1
Saccharomyces	Saccharomyces_sp_boulardii	GCA_001625055.1	Saccharomyces_cerevisiae	GCA_003273395.1
Saccharomyces	Saccharomyces_sp_boulardii	GCA_001625055.1	Saccharomyces_cerevisiae	GCA_003274975.1
Saccharomyces	Saccharomyces_sp_boulardii	GCA_001625055.1	Saccharomyces_cerevisiae	GCA_001739075.1
Saccharomyces	Saccharomyces_sp_boulardii	GCA_001625055.1	Saccharomyces_cerevisiae	GCA_001741555.1
Saccharomyces	Saccharomyces_sp_boulardii	GCA_001625055.1	Saccharomyces_cerevisiae	GCA_001671625.1
Saccharomyces	Saccharomyces_sp_boulardii	GCA_001625055.1	Saccharomyces_cerevisiae	GCA_002250225.1
Saccharomyces	Saccharomyces_sp_boulardii	GCA_001625055.1	Saccharomyces_cerevisiae	GCA_900178365.1
Saccharomyces	Saccharomyces_sp_boulardii	GCA_001625055.1	Saccharomyces_cerevisiae	GCA_001741705.1
Saccharomyces	Saccharomyces_sp_boulardii	GCA_001625055.1	Saccharomyces_cerevisiae	GCA_003272315.1
Saccharomyces	Saccharomyces_sp_boulardii	GCA_001625055.1	Saccharomyces_cerevisiae	GCA_001739105.1
Saccharomyces	Saccharomyces_sp_boulardii	GCA_000442675.2	Saccharomyces_cerevisiae_x_Saccharomyces_eubayanus_x_Saccharomyces_kudriavzevii_x_Saccharomyces_uvarum	GCA_009667055.1
Saccharomyces	Saccharomyces_sp_boulardii	GCA_000442675.2	Saccharomyces_cerevisiae_x_Saccharomyces_eubayanus_x_Saccharomyces_kudriavzevii_x_Saccharomyces_uvarum	GCA_009666875.1
Saccharomyces	Saccharomyces_sp_boulardii	GCA_000442675.2	Saccharomyces_cerevisiae_x_Saccharomyces_eubayanus_x_Saccharomyces_kudriavzevii_x_Saccharomyces_uvarum	GCA_009666495.1
Saccharomyces	Saccharomyces_sp_boulardii	GCA_000442675.2	Saccharomyces_pastorianus	GCA_001483335.1
Saccharomyces	Saccharomyces_sp_boulardii	GCA_000442675.2	Saccharomyces_pastorianus	GCA_001483345.1
Saccharomyces	Saccharomyces_sp_boulardii	GCA_000442675.2	Saccharomyces_pastorianus	GCA_000182115.1
Saccharomyces	Saccharomyces_sp_boulardii	GCA_000442675.2	Saccharomyces_pastorianus	GCA_000586535.1
Saccharomyces	Saccharomyces_sp_boulardii	GCA_000442675.2	Saccharomyces_pastorianus	GCA_003004515.1
Saccharomyces	Saccharomyces_sp_boulardii	GCA_000442675.2	Saccharomyces_pastorianus	GCA_001515445.2
Saccharomyces	Saccharomyces_sp_boulardii	GCA_000442675.2	Saccharomyces_pastorianus	GCA_001515485.2
Saccharomyces	Saccharomyces_sp_boulardii	GCA_000442675.2	Saccharomyces_pastorianus	GCA_011022315.1
Saccharomyces	Saccharomyces_sp_boulardii	GCA_000442675.2	Saccharomyces_pastorianus	GCA_000586595.1
Saccharomyces	Saccharomyces_sp_boulardii	GCA_000442675.2	Saccharomyces_cerevisiae_x_Saccharomyces_kudriavzevii	GCA_009665985.1
Saccharomyces	Saccharomyces_sp_boulardii	GCA_000442675.2	Saccharomyces_cerevisiae_x_Saccharomyces_kudriavzevii	GCA_000326105.1
Saccharomyces	Saccharomyces_sp_boulardii	GCA_000442675.2	Saccharomyces_cerevisiae_x_Saccharomyces_kudriavzevii	GCA_009667545.1
Saccharomyces	Saccharomyces_sp_boulardii	GCA_000442675.2	Saccharomyces_cerevisiae_x_Saccharomyces_kudriavzevii	GCA_009666265.1
Saccharomyces	Saccharomyces_sp_boulardii	GCA_000442675.2	Saccharomyces_cerevisiae_x_Saccharomyces_kudriavzevii	GCA_009667415.1
Saccharomyces	Saccharomyces_sp_boulardii	GCA_000442675.2	Saccharomyces_cerevisiae_x_Saccharomyces_kudriavzevii	GCA_009665535.1
Saccharomyces	Saccharomyces_sp_boulardii	GCA_000442675.2	Saccharomyces_cerevisiae_x_Saccharomyces_kudriavzevii	GCA_009665545.1
Saccharomyces	Saccharomyces_sp_boulardii	GCA_000442675.2	Saccharomyces_cerevisiae_x_Saccharomyces_kudriavzevii	GCA_003004545.1
Saccharomyces	Saccharomyces_sp_boulardii	GCA_000442675.2	Saccharomyces_cerevisiae	GCA_003273395.1
Saccharomyces	Saccharomyces_sp_boulardii	GCA_000442675.2	Saccharomyces_cerevisiae	GCA_003274975.1
Saccharomyces	Saccharomyces_sp_boulardii	GCA_000442675.2	Saccharomyces_cerevisiae	GCA_001739075.1
Saccharomyces	Saccharomyces_sp_boulardii	GCA_000442675.2	Saccharomyces_cerevisiae	GCA_001741555.1
Saccharomyces	Saccharomyces_sp_boulardii	GCA_000442675.2	Saccharomyces_cerevisiae	GCA_001671625.1
Saccharomyces	Saccharomyces_sp_boulardii	GCA_000442675.2	Saccharomyces_cerevisiae	GCA_002250225.1
Saccharomyces	Saccharomyces_sp_boulardii	GCA_000442675.2	Saccharomyces_cerevisiae	GCA_900178365.1
Saccharomyces	Saccharomyces_sp_boulardii	GCA_000442675.2	Saccharomyces_cerevisiae	GCA_001741705.1
Saccharomyces	Saccharomyces_sp_boulardii	GCA_000442675.2	Saccharomyces_cerevisiae	GCA_003272315.1
Saccharomyces	Saccharomyces_sp_boulardii	GCA_000442675.2	Saccharomyces_cerevisiae	GCA_001739105.1
Saccharomyces	Saccharomyces_sp_boulardii	GCA_001298375.2	Saccharomyces_cerevisiae_x_Saccharomyces_eubayanus_x_Saccharomyces_kudriavzevii_x_Saccharomyces_uvarum	GCA_009667055.1
Saccharomyces	Saccharomyces_sp_boulardii	GCA_001298375.2	Saccharomyces_cerevisiae_x_Saccharomyces_eubayanus_x_Saccharomyces_kudriavzevii_x_Saccharomyces_uvarum	GCA_009666875.1
Saccharomyces	Saccharomyces_sp_boulardii	GCA_001298375.2	Saccharomyces_cerevisiae_x_Saccharomyces_eubayanus_x_Saccharomyces_kudriavzevii_x_Saccharomyces_uvarum	GCA_009666495.1
Saccharomyces	Saccharomyces_sp_boulardii	GCA_001298375.2	Saccharomyces_pastorianus	GCA_001483335.1
Saccharomyces	Saccharomyces_sp_boulardii	GCA_001298375.2	Saccharomyces_pastorianus	GCA_001483345.1
Saccharomyces	Saccharomyces_sp_boulardii	GCA_001298375.2	Saccharomyces_pastorianus	GCA_000182115.1
Saccharomyces	Saccharomyces_sp_boulardii	GCA_001298375.2	Saccharomyces_pastorianus	GCA_000586535.1
Saccharomyces	Saccharomyces_sp_boulardii	GCA_001298375.2	Saccharomyces_pastorianus	GCA_003004515.1
Saccharomyces	Saccharomyces_sp_boulardii	GCA_001298375.2	Saccharomyces_pastorianus	GCA_001515445.2
Saccharomyces	Saccharomyces_sp_boulardii	GCA_001298375.2	Saccharomyces_pastorianus	GCA_001515485.2
Saccharomyces	Saccharomyces_sp_boulardii	GCA_001298375.2	Saccharomyces_pastorianus	GCA_011022315.1
Saccharomyces	Saccharomyces_sp_boulardii	GCA_001298375.2	Saccharomyces_pastorianus	GCA_000586595.1
Saccharomyces	Saccharomyces_sp_boulardii	GCA_001298375.2	Saccharomyces_cerevisiae_x_Saccharomyces_kudriavzevii	GCA_009665985.1
Saccharomyces	Saccharomyces_sp_boulardii	GCA_001298375.2	Saccharomyces_cerevisiae_x_Saccharomyces_kudriavzevii	GCA_000326105.1
Saccharomyces	Saccharomyces_sp_boulardii	GCA_001298375.2	Saccharomyces_cerevisiae_x_Saccharomyces_kudriavzevii	GCA_009667545.1
Saccharomyces	Saccharomyces_sp_boulardii	GCA_001298375.2	Saccharomyces_cerevisiae_x_Saccharomyces_kudriavzevii	GCA_009666265.1
Saccharomyces	Saccharomyces_sp_boulardii	GCA_001298375.2	Saccharomyces_cerevisiae_x_Saccharomyces_kudriavzevii	GCA_009667415.1
Saccharomyces	Saccharomyces_sp_boulardii	GCA_001298375.2	Saccharomyces_cerevisiae_x_Saccharomyces_kudriavzevii	GCA_009665535.1
Saccharomyces	Saccharomyces_sp_boulardii	GCA_001298375.2	Saccharomyces_cerevisiae_x_Saccharomyces_kudriavzevii	GCA_009665545.1
Saccharomyces	Saccharomyces_sp_boulardii	GCA_001298375.2	Saccharomyces_cerevisiae_x_Saccharomyces_kudriavzevii	GCA_003004545.1
Saccharomyces	Saccharomyces_sp_boulardii	GCA_001298375.2	Saccharomyces_cerevisiae	GCA_003273395.1
Saccharomyces	Saccharomyces_sp_boulardii	GCA_001298375.2	Saccharomyces_cerevisiae	GCA_003274975.1
Saccharomyces	Saccharomyces_sp_boulardii	GCA_001298375.2	Saccharomyces_cerevisiae	GCA_001739075.1
Saccharomyces	Saccharomyces_sp_boulardii	GCA_001298375.2	Saccharomyces_cerevisiae	GCA_001741555.1
Saccharomyces	Saccharomyces_sp_boulardii	GCA_001298375.2	Saccharomyces_cerevisiae	GCA_001671625.1
Saccharomyces	Saccharomyces_sp_boulardii	GCA_001298375.2	Saccharomyces_cerevisiae	GCA_002250225.1
Saccharomyces	Saccharomyces_sp_boulardii	GCA_001298375.2	Saccharomyces_cerevisiae	GCA_900178365.1
Saccharomyces	Saccharomyces_sp_boulardii	GCA_001298375.2	Saccharomyces_cerevisiae	GCA_001741705.1
Saccharomyces	Saccharomyces_sp_boulardii	GCA_001298375.2	Saccharomyces_cerevisiae	GCA_003272315.1
Saccharomyces	Saccharomyces_sp_boulardii	GCA_001298375.2	Saccharomyces_cerevisiae	GCA_001739105.1
Saccharomyces	Saccharomyces_sp_boulardii	GCA_001413975.1	Saccharomyces_cerevisiae_x_Saccharomyces_eubayanus_x_Saccharomyces_kudriavzevii_x_Saccharomyces_uvarum	GCA_009667055.1
Saccharomyces	Saccharomyces_sp_boulardii	GCA_001413975.1	Saccharomyces_cerevisiae_x_Saccharomyces_eubayanus_x_Saccharomyces_kudriavzevii_x_Saccharomyces_uvarum	GCA_009666875.1
Saccharomyces	Saccharomyces_sp_boulardii	GCA_001413975.1	Saccharomyces_cerevisiae_x_Saccharomyces_eubayanus_x_Saccharomyces_kudriavzevii_x_Saccharomyces_uvarum	GCA_009666495.1
Saccharomyces	Saccharomyces_sp_boulardii	GCA_001413975.1	Saccharomyces_pastorianus	GCA_001483335.1
Saccharomyces	Saccharomyces_sp_boulardii	GCA_001413975.1	Saccharomyces_pastorianus	GCA_001483345.1
Saccharomyces	Saccharomyces_sp_boulardii	GCA_001413975.1	Saccharomyces_pastorianus	GCA_000182115.1
Saccharomyces	Saccharomyces_sp_boulardii	GCA_001413975.1	Saccharomyces_pastorianus	GCA_000586535.1
Saccharomyces	Saccharomyces_sp_boulardii	GCA_001413975.1	Saccharomyces_pastorianus	GCA_003004515.1
Saccharomyces	Saccharomyces_sp_boulardii	GCA_001413975.1	Saccharomyces_pastorianus	GCA_001515445.2
Saccharomyces	Saccharomyces_sp_boulardii	GCA_001413975.1	Saccharomyces_pastorianus	GCA_001515485.2
Saccharomyces	Saccharomyces_sp_boulardii	GCA_001413975.1	Saccharomyces_pastorianus	GCA_011022315.1
Saccharomyces	Saccharomyces_sp_boulardii	GCA_001413975.1	Saccharomyces_pastorianus	GCA_000586595.1
Saccharomyces	Saccharomyces_sp_boulardii	GCA_001413975.1	Saccharomyces_cerevisiae_x_Saccharomyces_kudriavzevii	GCA_009665985.1
Saccharomyces	Saccharomyces_sp_boulardii	GCA_001413975.1	Saccharomyces_cerevisiae_x_Saccharomyces_kudriavzevii	GCA_000326105.1
Saccharomyces	Saccharomyces_sp_boulardii	GCA_001413975.1	Saccharomyces_cerevisiae_x_Saccharomyces_kudriavzevii	GCA_009667545.1
Saccharomyces	Saccharomyces_sp_boulardii	GCA_001413975.1	Saccharomyces_cerevisiae_x_Saccharomyces_kudriavzevii	GCA_009666265.1
Saccharomyces	Saccharomyces_sp_boulardii	GCA_001413975.1	Saccharomyces_cerevisiae_x_Saccharomyces_kudriavzevii	GCA_009667415.1
Saccharomyces	Saccharomyces_sp_boulardii	GCA_001413975.1	Saccharomyces_cerevisiae_x_Saccharomyces_kudriavzevii	GCA_009665535.1
Saccharomyces	Saccharomyces_sp_boulardii	GCA_001413975.1	Saccharomyces_cerevisiae_x_Saccharomyces_kudriavzevii	GCA_009665545.1
Saccharomyces	Saccharomyces_sp_boulardii	GCA_001413975.1	Saccharomyces_cerevisiae_x_Saccharomyces_kudriavzevii	GCA_003004545.1
[truncated: 428 more rows]
